# Supplementary material for: A new biogeochemical modelling framework (FLaMe v1.0) for lake methane emissions on the regional scale: Development and application to the European domain
Source: Copernicus journal article supplement (doi:10.5194/egusphere-2025-1306), 2025-03-28
Supplement: Supplementary file [file Manuscript_20250715_submit_plain.pdf › Reply to Reviewer 1/Manuscript_20250715_submit_plain.pdf]

1 **A new biogeochemical modelling framework (FLaMe-v1.0) for lake methane**  
2 **emissions on the regional scale: Development and application to the European**  
3 **domain**

4 Manon Maisonnier<sup>1</sup>, Maoyuan Feng<sup>1\*</sup>, David Bastviken<sup>2</sup>, Sandra Arndt<sup>1</sup>, Ronny Lauerwald<sup>3</sup>, Aidin  
5 Jabbari<sup>4</sup>, Goulven Gildas Laruelle<sup>1</sup>, Murray D. MacKay<sup>5</sup>, Zeli Tan<sup>6</sup>, Wim Thiery<sup>7</sup>, Pierre Regnier<sup>1</sup>

6 <sup>1</sup>Biogeochemistry and Modelling of the Earth System-BGEOSYS, Department of Geoscience,  
7 Environment and Society, Université Libre de Bruxelles, Brussels, Belgium

8 <sup>2</sup>Linköping University, Department of Thematic Studies, Tema Environmental Change, Sweden

9 <sup>3</sup>Université Paris-Saclay, INRAE, AgroParisTech, UMR Ecosys, Palaiseau, France

10 <sup>4</sup>Environmental Fluid Dynamics Laboratory, Department of Civil Engineering, Queen's University,  
11 Kingston, ON, Canada

12 <sup>5</sup>Science and Technology Branch, Environment and Climate Change Canada, Toronto, M3H5T4,  
13 Canada

14 <sup>6</sup>Pacific Northwest National Laboratory, Richland, WA, USA

15 <sup>7</sup>Department of Water and Climate, Vrije Universiteit Brussel, Brussels, Belgium

16

17 \*Correspondence to Maoyuan Feng ([maoyuan.feng@ulb.be](mailto:maoyuan.feng@ulb.be))

## 18    **Abstract**

19        This study presents a new physical-biogeochemical modelling framework for simulating lake  
20 methane (CH<sub>4</sub>) emissions at regional scales. The new model, FLaMe-v1.0 (**F**luxes of **L**ake **M**ethane),  
21 rests on an innovative, computationally efficient lake clustering approach that enables the simulation  
22 of CH<sub>4</sub> emissions across a large number of lakes. Building on the Canadian Small Lake Model (CSLM)  
23 that simulates the lake physics, we develop a suite of biogeochemical modules to simulate transient  
24 dynamics of organic Carbon (C), Oxygen (O<sub>2</sub>), and CH<sub>4</sub>. We first test the performance of FLaMe-  
25 v1.0 by analyzing physical and biogeochemical processes in two theoretical lakes with characteristics  
26 that can be considered representative for many lakes (an oligotrophic, deep lake driven by cold  
27 climate *versus* a eutrophic, shallow lake driven by warm climate). Next, we evaluate the model by  
28 comparing simulated and observed timeseries of CH<sub>4</sub> emissions in four well-surveyed lakes. We then  
29 apply FLaMe-v1.0 at the European scale to evaluate simulated diffusive and ebullitive lake CH<sub>4</sub>  
30 fluxes against *in-situ* measurements in both boreal and central European regions. Finally, we provide  
31 a first assessment of the spatio-temporal variability in CH<sub>4</sub> emissions from European lakes with a  
32 surface area comprised between 0.1–1000 km<sup>2</sup> (n=108407, total area = 1.33x10<sup>5</sup> km<sup>2</sup>), indicating a  
33 total emission of 0.97±0.23 Tg CH<sub>4</sub> yr<sup>-1</sup>, with the uncertainty constrained by combining FLaMe-v1.0  
34 and machine learning techniques. Moreover, 30% and 70% of these CH<sub>4</sub> emissions are through  
35 diffusive and ebullitive pathways, respectively. Annually averaged CH<sub>4</sub> emission rates per unit lake  
36 area during 2010–2016 have a South-to-North decreasing gradient, resulting in a mean over the  
37 European domain as 7.39 g CH<sub>4</sub> m<sup>-2</sup> yr<sup>-1</sup>. Our simulations reveal a strong seasonality (with ice-  
38 blocking effects accounted for) in European lake CH<sub>4</sub> emissions, with nearly ten times higher  
39 emissions during late summer than during winter. This pronounced seasonal variation highlights the  
40 importance of accounting for the sub-annual variability in CH<sub>4</sub> emissions to accurately constrain  
41 regional CH<sub>4</sub> budgets. In the future, FLaMe-v1.0 could be embedded into Earth System Models to  
42 investigate the feedback between climate warming and global lake CH<sub>4</sub> emissions.

## 43 1. Introduction

44 Methane (CH<sub>4</sub>) is the second most important greenhouse gas after carbon dioxide (CO<sub>2</sub>), with a  
45 Global Warming Potential (GWP) per mass ~28 times higher than that of CO<sub>2</sub> over a 100-year horizon  
46 (Saunois *et al.*, 2020). Over the last centuries, the atmospheric CH<sub>4</sub> concentration has increased from  
47 722 ppb in the pre-industrial period (year 1750) to 1923 ppb in year 2023 (Saunois, *et al.*, 2020;  
48 Dlugokencky, 2022; Forster *et al.*, 2024) and this increase is expected to continue in the future. The  
49 critical role of CH<sub>4</sub> in global warming has called for the establishment of a comprehensive global  
50 CH<sub>4</sub> budget, which embraces both natural and anthropogenic sources (Saunois *et al.*, 2016; 2020;  
51 2024). This budget identified inland freshwaters (lakes, reservoirs, ponds, rivers, etc.) as an important,  
52 yet highly uncertain atmospheric CH<sub>4</sub> source (Jackson *et al.*, 2020, 2024; Saunois, *et al.*, 2020,  
53 Canadell *et al.*, 2021). Global lake CH<sub>4</sub> emissions, which has been estimated to account for ~5 to 20%  
54 of total CH<sub>4</sub> emissions (576 TgCH<sub>4</sub> yr<sup>-1</sup>), are the largest contributors to this inland water source  
55 (Jackson *et al.*, 2020; Saunois *et al.*, 2020). However, estimates of its magnitude vary depending on  
56 the assessment methods, with discrepancies of up to a factor of four (Saunois *et al.*, 2020; DelSontro  
57 and John 2018; Rosentreter *et al.*, 2021; Bastviken *et al.*, 2011; Deemer *et al.*, 2016; Johnson *et al.*,  
58 2021; Holgerson and Raymond 2016; Stavert *et al.* 2022). This variability in global estimates also  
59 manifests itself at the continental scale. For instance, estimates of European lake methane emissions  
60 range from 0.9 to 2.5 Tg CH<sub>4</sub> yr<sup>-1</sup> (Petrescu *et al.* 2021, 2023; Lauerwald *et al.*, 2023).

61 Observation-based upscaling approaches are highly dependent on the availability and quality of  
62 *in-situ* measurements, which are unevenly distributed across the globe and biased towards summer  
63 months (Canadell *et al.*, 2021; Johnson *et al.*, 2022). Although the number of CH<sub>4</sub> emission  
64 measurements from lakes has increased considerably in recent decades, the two largest current

65 databases together contain only 1081 records from 575 lakes worldwide (Rosentreter *et al.*, 2021;  
66 Johnson *et al.*, 2022). This relatively small data compilation is unlikely to capture the full diversity  
67 of physical and biogeochemical patterns of >1.4 million lakes worldwide, which vary by morphology,  
68 climate, trophic status, and underlying sediment characteristics (Rinta *et al.*, 2017; Bastviken 2004,  
69 2022; Deemer and Holgerson 2021; Johnson *et al.*, 2022). Even more critically, the underlying data  
70 collection was not designed to capture the inter-annual and decadal variability in CH<sub>4</sub> emissions  
71 driven by climate change and nutrient dynamics, hence rendering the decomposition of the total lake  
72 CH<sub>4</sub> fluxes into natural and human-induced components challenging (Saunois *et al.*, 2020). Finally,  
73 although current instruments and techniques can effectively capture CH<sub>4</sub> fluxes through diffusive  
74 (driven by gradients of aqueous CH<sub>4</sub> concentrations) and ebullitive (via gas bubbles in the sediments  
75 due to oversaturation) emission pathways, measurements related to lake turnover events (release of  
76 previously accumulated CH<sub>4</sub> due to stratification and ice cover) and transport through vegetation  
77 aerenchyma remain highly challenging (Denfeld *et al.*, 2018; Mayr *et al.*, 2020; Zimmermann *et al.*,  
78 2019). These limitations induce large uncertainties in observation-based upscaling methods. In this  
79 context, process-based modelling approaches – that rely on detailed representations of lake physical  
80 and biogeochemical processes informed and tested with the available observational data – offer  
81 complementary strategies to help reduce these uncertainties.

82 Process-based biogeochemical models provide powerful tools to upscale scarce observations,  
83 both in space and in time. In combination with the available observational datasets, they can help  
84 deliver regional and global estimates of lake CH<sub>4</sub> emissions from daily to decadal timescales, as well  
85 as future projections. These mechanistic models can also help identify the drivers such as climate,  
86 land-use and atmospheric composition changes responsible for the complex temporal dynamics of

lake CH<sub>4</sub> emissions. Over the last decades, several process-based models have thus emerged, e.g., LAKE 2.0 (Stepanenko *et al.* 2016), bLake4Me (Tan *et al.*, 2015), and ALBM (Tan *et al.*, 2018; 2024), to estimate lake CH<sub>4</sub> emissions to the atmosphere. These models explicitly account for the physical and biogeochemical processes that govern lake CH<sub>4</sub> dynamics and resulting emissions. For instance, using ALBM, Zhuang *et al.* (2023) recently estimated that global lakes (larger than 0.1 km<sup>2</sup>) emit  $24.0 \pm 8.4$  Tg CH<sub>4</sub> yr<sup>-1</sup>, which is at the lower end of the range reported by Saunois *et al.* (2020) and represents 11% of total global CH<sub>4</sub> emissions from natural sources as estimated from atmospheric inversions. Yet, these process-based models also have limitations that need to be addressed. A central limitation is the omission of lake phytoplankton productivity, which is one of the most reactive organic C sources and thus substrates for CH<sub>4</sub> production. In most of existing models, this key process and the associated microbial degradation of organic C is not simulated explicitly but taken as prescribed model inputs. If phytoplankton productivity and associated contributions of methane substrates can be incorporated in lake CH<sub>4</sub> models, this would allow capturing the impacts of environmental conditions beyond the commonly included direct temperature effects on organic matter decomposition and CH<sub>4</sub> production. Such additional important impacts include feedback of C metabolism on lake oxygen (O<sub>2</sub>) cycling along with eutrophication effects on CH<sub>4</sub> emissions (Del Sontro *et al.*, 2018; Rosentreter *et al.*, 2021; Stavert *et al.*, 2022). However, it is challenging to explicitly describe the suite of key physical and biogeochemical processes controlling the coupled C-O<sub>2</sub>-CH<sub>4</sub> cycles while at the same time maintaining model complexity, as well as the needs for observational data and computational costs for regional and global scale applications with tractable bounds. In addition, it also requires the quantification of nutrient inputs from the surrounding catchments, which exert a key control on lake productivity.

109 To tackle these challenges, we here develop a new process-based model framework of  
110 intermediate complexity, FLaMe-v1.0 (**F**luxes of **L**ake **M**ethane version 1.0,) that couples the C-O<sub>2</sub>-  
111 CH<sub>4</sub> cycles in lakes using a one-dimensional representation. Specifically, FLaMe-v1.0 builds upon  
112 the existing physical lake model CSLM (Canadian Small Lake Model–MacKay, 2012; MacKay *et*  
113 *al.*, 2017), and extends with a novel biogeochemical module that captures the production, oxidation,  
114 storage, transport and emissions of CH<sub>4</sub> in/from lakes. Importantly, FLaMe-v1.0 introduces lake  
115 primary production and turnover of autochthonous organic carbon as a major driver of lake O<sub>2</sub> and  
116 CH<sub>4</sub> dynamics. The coupled, mechanistic lake model is then embedded in a computationally efficient  
117 clustering approach that allows for the application of the new, coupled, mechanistic lake model for  
118 (i) large parameter/input ensemble runs on regional/global scales for uncertainty assessments, (ii)  
119 long-term model projections for the assessment of future climate change and its feedback on the Earth  
120 system, (iii) a potential coupling to Earth System Models (ESMs) in subsequent stages of its  
121 development.

122 The structure of this paper is described as follows. In section 2, we provide a general description  
123 of the lake model with a focus on a detailed description of the novel biogeochemical modules, as well  
124 as the parameter choices and numerical solutions. In section 3, we first test the overall behavior of  
125 FLaMe-v1.0 using two representative lakes (an oligotrophic, deep lake driven by cold climate *versus*  
126 a trophic, shallow lake driven by warm climate), and then evaluate the simulated temporal variations  
127 of CH<sub>4</sub> fluxes against observational data at four well-surveyed lakes in the real world. Next, we apply  
128 FLaMe-v1.0 at the European scale and evaluate the results against *in-situ* measurements in boreal and  
129 central European lakes compiled by Rinta *et al.* (2017). Finally, we provide a spatio-temporally  
130 resolved estimate of CH<sub>4</sub> emissions from European lakes (2010–2016), assess their sensitivity to key

131 model parameters, and constrain their uncertainty range using a machine-learning approach. In  
132 section 4, we discuss model limitations and potential directions for further research. Main conclusions  
133 and outlooks are drawn in section 5.

## 134 **2. Methodology**

### 135 **2.1 General model approach**

136 We developed a new process-based physical-biogeochemical model, FLaMe-v1.0 (Fluxes of  
137 Lake Methane), to simulate lake CH<sub>4</sub> production and emission at large spatial scales. FLaMe-v1.0  
138 resolves the interplay of physical and biogeochemical processes that governs organic matter ( $C_{OC,auto}$ ),  
139 oxygen (O<sub>2</sub>), and methane (CH<sub>4</sub>) dynamics to estimate (diffusive and ebullitive) lake CH<sub>4</sub> emissions,  
140 as well as CH<sub>4</sub> storage fluxes due to lake turnover and ice melting. To enable a continental-scale  
141 application of FLaMe-v1.0 (e.g., in Europe,  $n=108407$  and total area =  $1.33 \times 10^5$  km<sup>2</sup> for lakes with  
142  $0.1 \leq A_0 \leq 1000$  km<sup>2</sup> according to Messenger *et al.*, 2016;  $A_0$  is the lake surface area), we here propose  
143 a lake clustering strategy to reduce the computational and data/input costs (Fig. 1) while resolving  
144 the variability in lake sizes, morphology, and trophic status as well as climate conditions across  
145 Europe. Within each grid cell ( $2.5^\circ \times 2.5^\circ$ ), lakes are binned into four classes arbitrarily according to  
146 surface area (0.1–1 km<sup>2</sup>, 1–10 km<sup>2</sup>, 10–100 km<sup>2</sup>, 100–1000 km<sup>2</sup>). We then run a FLaMe-v1.0  
147 simulation for one representative lake per size class within each grid cell, using the arithmetic means  
148 of lake area, depth and trophic status of all lakes pertaining to the respective size class across the  
149 respective grid cell. Note that the areas and depths of all lakes are available from HydroLAKES  
150 database (Messenger *et al.*, 2016) while trophic status is derived from outputs of the GlobalNEWS  
151 model (Mayorga *et al.*, 2010; Lauerwald *et al.*, 2019). The total emission flux from a given size class

152 can be obtained by multiplying the CH<sub>4</sub> emission rates simulated by FLaMe-v1.0 with the total lake  
 153 area of this size class (Fig. 1).

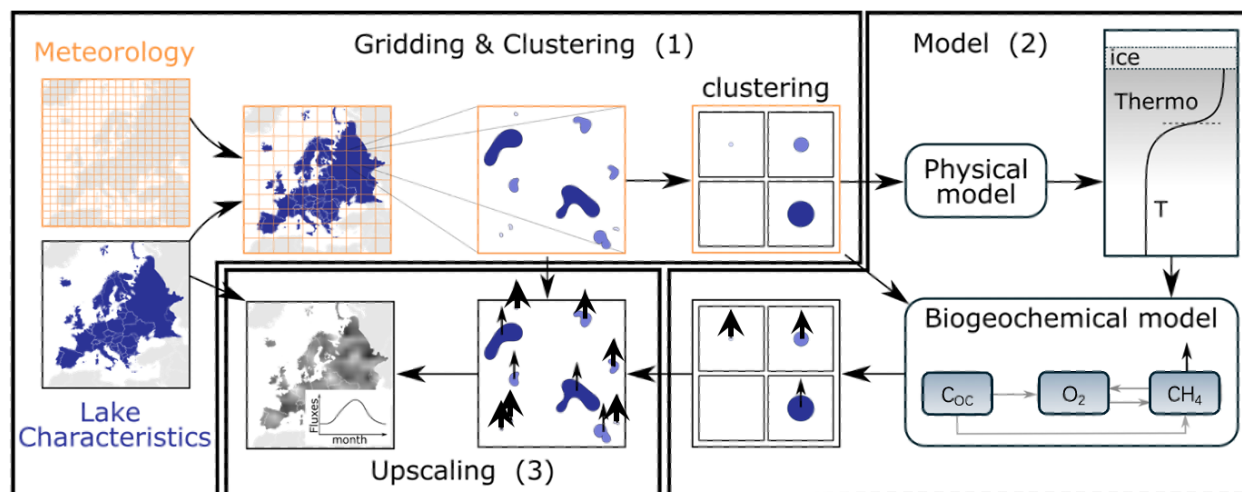

154

155 **Fig. 1. Illustration of the lake clustering and upscaling strategy for the continental application of FLaMe-v1.0**  
 156 **(Europe as an example). (1) Gridding and clustering:** The European domain was divided into grid cells at a coarse  
 157 **spatial resolution of 2.5°×2.5°.** Within each grid cell, lakes are clustered into four classes according to their surface  
 158 **areas. (2) FLaMe-v1.0 parallelization:** FLaMe-v1.0 simulates the lake metabolic dynamics, vertically resolved  
 159 **concentration and rate profiles of the coupled O<sub>2</sub>-CH<sub>4</sub> cycle as well as diffusive and ebullitive CH<sub>4</sub> fluxes through**  
 160 **the water-air interface. The model was parallelized under transient conditions for each grid cell and each lake**  
 161 **class. (3) Upscaling:** The areal rates (i.e., fluxes per unit lake surface area) simulated by FLaMe-v1.0 were then  
 162 **multiplied by the total surface area of each lake class within each grid cell (available from HydroLAKES) and**  
 163 **aggregated at the monthly timescale. The arrows pertaining to clustered and original lakes represent the CH<sub>4</sub>**  
 164 **emissions and the arrow size represent the magnitude of the flux (i.e., a lower flux for larger lakes).**

## 165 2.2 Model description

166 FLaMe-v1.0 builds on an online coupling approach between the Canadian Small Lake Model  
 167 (CSLM; MacKay, 2012; MacKay *et al.*, 2017) – a widely used lake physics model (Garnaud *et al.*,



2022; Versegny and MacKay, 2017; William *et al.*, 2014) – and a set of newly developed biogeochemical modules that resolve lake OC, O<sub>2</sub> and CH<sub>4</sub> dynamics. We selected the CSLM as the basis of the representation of lake physical processes in FLaMe-v1.0 because CSLM was designed for small lakes that accounts for >90 % of lakes (by number, mean depth <7.8 m) but contribute disproportionately to lake CH<sub>4</sub> emissions in the European domain (HydroLAKES; Messenger *et al.*, 2016), as well as due to the expertise in our research team. CSLM simulates the following physical variables: temperature profile ( $T$ ), thermocline depth ( $h_{mix}$ , at which the vertical temperature gradient reaches its maximum), photic depth ( $h_{phot}$ , down to which the sunlight can penetrate, with radiation density of at least 1% of that at the lake surface), and ice cover, which will be used to force the biogeochemical modules (Fig. 2). In turn, the biogeochemical module will later modify the photic depth simulated by CSLM to account for the effect of phytoplankton growth and self-shading on light penetration, thus resolving the feedback between lake biogeochemical processes and lake physical dynamics, hence forming a complete feedback loop. A detailed description of the well-established CSLM model can be found in MacKay (2012) and MacKay *et al.* (2017) and is also briefly presented in Supplementary Text S1. Compared with other lake models (Table S1), the most important improvements in FLaMe-v1.0 are the adoption of a “valley” shape lake set up and the incorporation of autochthonous carbon dynamics (i.e., explicit simulation of primary production, decomposition, and oxygen processes) and its phosphorus limitation, which have been shown to be key control factors of CH<sub>4</sub> dynamics (Søndergaard *et al.*, 2017; Guildford and Heckay, 2000; Schindler, 1977). In what follows, we provide a detailed description of the vertically resolved 1D model set-up (section 2.2.1) used here, as well as of the novel biogeochemical modules (section 2.2.2). All the involved model parameters, their values, and ranges are summarized in Table 1 (section 2.3).

### 2.2.1 Model Scope: Idealized representation of lake morphology

Figure 2 illustrates the vertically resolved, one-dimensional model set-up of FLAME-v1.0 that is used for both the physical and biogeochemical modules. The original version of CSLM usually adopts a “bucket” shaped morphology which assumes a constant area ( $A$ ) versus water depth ( $z$ ), i.e.,  $A(z) = A_0$ , where  $A_0$  is the lake surface area at  $z = 0$  m. However, this morphology is unsuitable for the simulation of biogeochemical processes, especially when variations in water depth within each lake are important. Therefore, we, instead, adopted a “valley” shaped lake morphology, with lake area  $A(z)$  given by:

$$A(z) = \frac{A_0}{2s} (s + \operatorname{arctanh}((1 - 2(z/h_{\max}))\tanh(s))) \quad (1)$$

where  $A$  is the lake area ( $\text{m}^2$ ),  $z$  is the water depth (m),  $s$  is a shape parameter that controls the slope of the lakebed (a larger  $s$  indicates a steeper slope), and  $h_{\max}$  is the maximum lake depth. To ensure that the volume (and hence heat exchange) is conserved between the “bucket” and “valley” shape set-ups, the maximum depth of the valley-shape lake,  $h_{\max}$ , must be twice that of the mean depth of the bucket-shape lake,  $h_{\text{mean}}$  (i.e.,  $h_{\max} = 2h_{\text{mean}}$ ), which was extracted from the global HydroLAKES database compiled by Messenger *et al.* (2016). The bottom temperature profiles simulated by CSLM were then extended to the maximal depth of the valley shape lake.

Physical processes in the water column are simulated by CSLM, on a one-dimensional, vertically resolved, evenly distributed grid with a grid spacing of 50 cm. Each layer of the water column is connected to a vertically integrated lake sediment column of 5 m depth ( $h_s$ , m) (Langenegger *et al.*, 2019) (Fig. 2). Since the  $\text{CH}_4$  production rate decreases exponentially with sediment depth (not applicable to thermokarst lakes), it is typically negligible at 5 m within the sediment column

211 (Langenegger *et al.*, 2019), thus ensuring that the total, depth-integrated benthic  $\text{CH}_4$  production  
 212 becomes insensitive to this arbitrary choice. The surface area of each sediment column in contact  
 213 with the water column is determined by difference in the widths of two adjacent water layers  $A(z)$   
 214 (Eq. (1)). In addition, it should be noted that we assume no **horizontal** material exchanges ( $\text{O}_2$  and  
 215  $\text{CH}_4$ ) between the sediments and water columns (i.e., across the interface where left and right edges  
 216 of a water layer touch the sediment box; Fig. 2) because of its relatively minor magnitude compared  
 217 to the vertical exchanges (Stepanenko *et al.*, 2016; Tan *et al.*, 2024) as well as the lack of  
 218 observational data. Therefore, only the vertical exchanges are simulated in this first version of the  
 219 model (see details in the following sections).

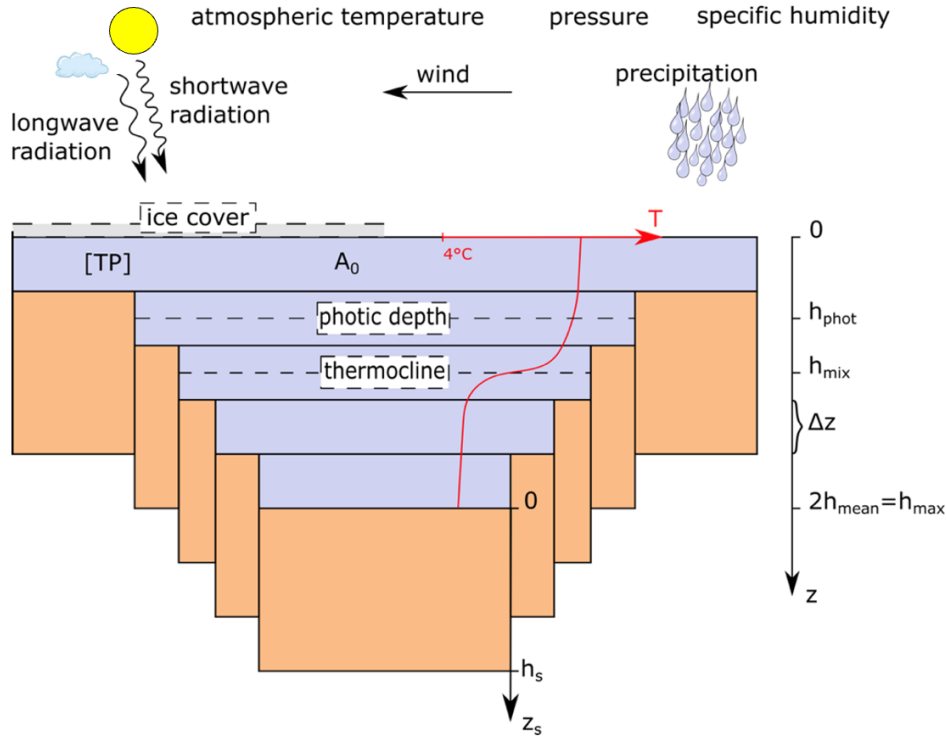

220

221 **Fig. 2. Schematic representation of the lake morphology in FLaMe-v1.0. The lake is represented by a “valley”**  
 222 **shape (denoted by Eq. (1)).  $A_0$  denotes the lake surface area,  $A$  is the area of each water layer, and  $h_{\text{max}}$  is the**  
 223 **maximal water column depth.  $z$  represents the depth of a water column down to the surface of a sediment column**

224 while  $z_s$  stands for the depth inside a sediment column ( $z_s = 0$  at the sediment water interface). The physical model  
225 is forced by longwave and shortwave radiation, near-surface wind, precipitation, atmospheric temperature,  
226 pressure, and specific humidity. Purple color indicates the water layers, and orange color indicates the sediment  
227 columns.

## 228 2.2.2 Biogeochemical Modules

### 229 2.2.2.1 Organic carbon module

230 Following the approach of Maavara *et al.* (2017), FLaMe-v1.0 does not resolve the vertical  
231 distribution of labile (i.e., microbial degradable) organic carbon (OC) concentrations ( $[C_{OC,auto}]$ )  
232 produced by in-lake primary production, but only simulates the temporal dynamics of the volume-  
233 integrated autochthonous OC stock ( $\overline{C_{OC,auto}}$ , g C) (the overbar here indicates a volume-integrated  
234 value).  $\overline{C_{OC,auto}}$  should be understood as a simple indicator or an overall reflection of the resulting  
235 lake trophic status, itself controlled by the combined effects of climate and nutrient loads from the  
236 catchment. The allochthonous C inputs delivered from surrounding catchments are more refractory  
237 and generally have a slower decomposition rate (Grasset *et al.*, 2018; Guillemette *et al.*, 2017;  
238 DelSontro *et al.*, 2018), although  $CH_4$  production from allochthonous OC has in some instances been  
239 reported to be higher than from autochthonous compounds in laboratory incubations (Grasset *et al.*,  
240 2018). Thus, we consider the allochthonous OC as less important substrates for  $CH_4$  production, and  
241 consider the autochthonous primary production as the only labile OC source in this first model version;  
242 the allochthonous OC contribution will be added in the future upgrade of the model.

243 The temporal evolution of volume-integrated labile OC stock is determined by the interplay  
244 between autochthonous primary production, pelagic and benthic mineralization and burial fluxes  
245 (Maavara *et al.*, 2017):

$$\frac{\partial \overline{C_{OC,auto}}}{\partial t} = \overline{F_{PP}} - \overline{F_{Min}} - \overline{F_{Bur}} \quad (2)$$

where  $t$  is time (day), and  $\overline{C_{OC,auto}}$  is the volume-integrated OC stock (g C).  $\overline{F_{PP}}$ ,  $\overline{F_{Min}}$  and  $\overline{F_{Bur}}$  are the volume-integrated primary production, mineralization, and sedimentary burial fluxes (g C d<sup>-1</sup>), respectively. Following Maavara et al. (2017), we assume that autochthonous primary production rates are controlled by the light regime, water temperature, and the lake total phosphorus (TP) concentration ([TP], g P m<sup>-3</sup>) (Reynolds, 2006). The volume-integrated  $\overline{F_{PP}}$  can then be expressed using a classical Michaelis-Menten formulation (Mavaara *et al.*, 2017):

$$\overline{F_{PP}} = B P_{Chl,max} M(T_{mean}) \frac{[TP]}{K_{s,P} + [TP]} V_{phot} \quad (3)$$

where  $B$  is the phytoplankton biomass (expressed as chlorophyll-a concentration, g Chl-a m<sup>-3</sup>) in the photic zone (Eq. (5)),  $P_{Chl,max}$  is the maximum carbon fixation rate per unit of chlorophyll-a (g C (g Chl-a)<sup>-1</sup> h<sup>-1</sup>),  $M$  is a dimensionless metabolic correction factor that depends on the mean lake water temperature in photic zone  $T_{mean}$  (°C) (see Eq. (4)),  $K_{s,P}$  is the half-saturation constant for phosphorus limitation (g P m<sup>-3</sup>), and  $V_{phot}$  is the water volume above the photic depth (m<sup>3</sup>). Parameters  $P_{Chl,max}$  and  $K_{s,P}$  are constrained based on published observations (see section 2.3), while the metabolic factor  $M$  is given by:

$$M(T_{mean}) = \begin{cases} 1, & T_{mean} \geq 28^\circ\text{C} \\ Q_{10,prod}^{\frac{T_{mean}-28}{10}}, & T_{mean} < 28^\circ\text{C} \end{cases} \quad (4)$$

where  $Q_{10,prod}$  is the temperature sensitivity for primary production, quantifying the increases of the metabolic factor per 10 degree increase in temperature. Surface water phytoplankton biomass,  $B$ , is approximated by a function of the photosynthetically active radiation ( $PAR$ ), which is determined by shortwave radiation and light extinction in the water column:

$$B = \left(\frac{1}{k_c}\right) \left(0.75 \left(\frac{PP}{RP}\right) \ln \left(\frac{0.7PAR_0}{0.5PAR_k}\right) \left(\frac{1}{h_{prod}}\right) - (K_{dw} + K_{dp} + K_{dg})\right) \quad (5)$$

where  $k_c$  is the absorbance of  $PAR$  per unit of chlorophyll-a ( $m^2 (g \text{ Chl-a})^{-1}$ ), and  $PP/RP$  is the ratio of maximum gross photosynthesis to respiration per unit chlorophyll-a.  $PAR_0$  is the  $PAR$  at the lake surface ( $\mu\text{mol m}^{-2} \text{ s}^{-1}$ ), determined by the incoming shortwave radiation, as well as the daytime that is specified by lake latitude and phenology (represented by the day of the year).  $PAR_k$  is the  $PAR$  at the onset of photosaturation ( $\mu\text{mol m}^{-2} \text{ s}^{-1}$ ). The productive depth  $h_{prod}$  is determined as the maximum of the thermocline and the photic depth simulated by the physical model.  $K_{dw}$ ,  $K_{dp}$ , and  $K_{dg}$  represent nonalgal  $PAR$  attenuations, due to pure water, inorganic suspended particulate matter, and labile carbon, respectively. Following Lewis (2011),  $K_{dg}$  is calculated as a function of  $[C_{OC,auto}]$  as:

$$\ln(K_{dg}) = -4.44 + 1.80\ln([C_{OC,auto}]) - 0.149(\ln([C_{OC,auto}]))^2. \quad (6)$$

Eq. (5) was derived based on the assumption of a balance between production and respiration (Reynolds, 2006; Lewis, 2011). Here we slightly relax this assumption and assume near-equilibrium conditions for given climate conditions at the monthly timescale, allowing us to simulate seasonal variations of primary production and associated biogeochemical processes. Note that this assumption is only used for biogeochemical variables related to primary production, while physical variables simulated by CSLM are resolved at a sub-daily time step.

Following Hanson *et al.* (2011; 2014) and Maavara *et al.* (2019), the volume-integrated mineralization rate is simulated as a function of temperature and labile OC availability:

$$\overline{F_{Min}} = k_{20} \theta^{T_{mean}-20} \overline{C_{OC,auto}} \quad (7)$$

286 where  $k_{20}$  is a first-order rate constant for the mineralization of  $\overline{C_{labile}}$  at 20 °C ( $d^{-1}$ ).  $T_{mean}$  is the  
 287 mean water temperature (°C) in photic zone, and  $\theta$  is the temperature dependence of mineralization  
 288 of organic matter (Hanson *et al.*, 2014).

289 Following Maavara *et al.* (2019), the burial flux  $\overline{F_{Bur}}$  is represented by a first order process  
 290 driven by the labile OC stock  $\overline{C_{OC,auto}}$ :

$$291 \quad \overline{F_{Bur}} = k_{bur} \overline{C_{OC,auto}} \quad (8)$$

292 where  $k_{bur}$  is the burial rate constant and here set as half of the mineralization rate constant following  
 293 the ratios between these two processes reported in the global lake dataset ( $n=230$ ) assembled by  
 294 Mendonça *et al.* (2017). This ratio is likely an upper bound because it accounts for contributions of  
 295 both autochthonous and allochthonous carbon sources in the dataset, while allochthonous inputs  
 296 should have higher burial/decomposition ratios than autochthonous ones (Mendonça *et al.*, 2017;  
 297 Guillemette *et al.*, 2017).

#### 298 **2.2.2.2 Methane module**

299 The methane module simulates the dynamics of  $CH_4$  concentration in both sediment and water  
 300 columns as controlled by  $CH_4$  production, aerobic  $CH_4$  oxidation, and diffusive and ebullitive  
 301 transport from sediment to water and atmosphere (Fig. 3). Since the observational evidence suggests  
 302 that benthic  $CH_4$  production is the dominant  $CH_4$  source in lakes (Tan *et al.*, 2015; Bastviken, 2022),  
 303 we neglect the  $CH_4$  production within the lake's water column in the model.

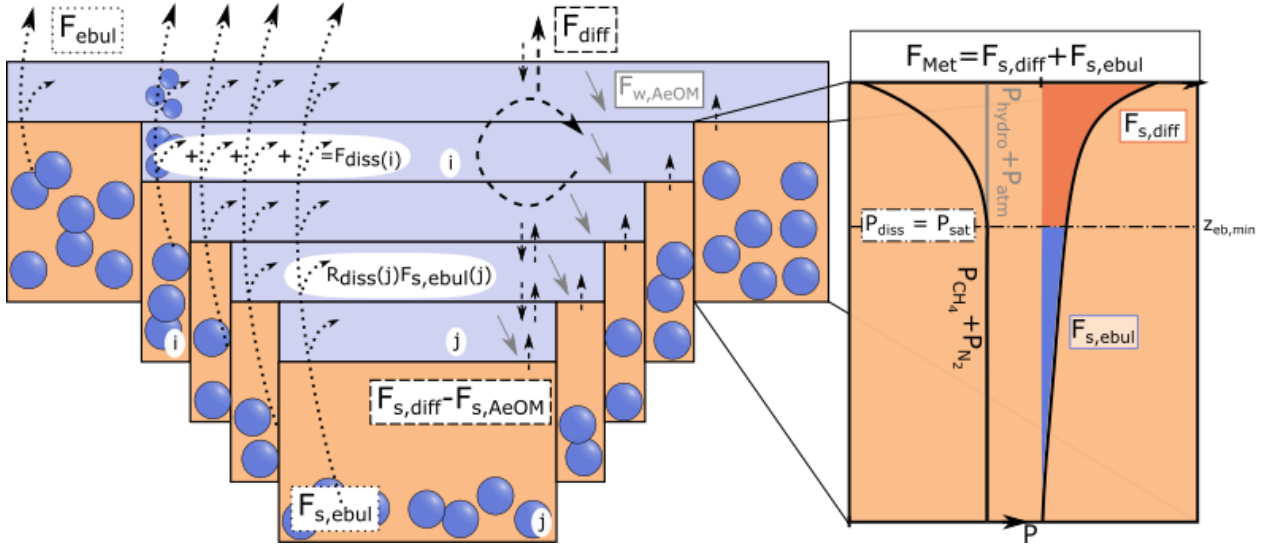

**Fig. 3. Illustration of the methane (CH<sub>4</sub>) module of FLAME with a zoom into benthic CH<sub>4</sub> dynamics (zoom modified from Langenegger *et al.*, 2019). Benthic CH<sub>4</sub> production (zoom) assumes an exponential decrease in CH<sub>4</sub> production rate ( $F_{Met}$ ) with depth. The CH<sub>4</sub> and N<sub>2</sub> partial pressures ( $P_{CH_4} + P_{N_2}$ ) is mainly driven by the CH<sub>4</sub> production and follows the black curve profile, which starts to exceed the sum of the hydrostatic and atmospheric pressure ( $P_{hydro} + P_{atm} - P_{H_2O}$ , grey line) at  $z_{eb,min}$ . Thus, this depth ( $z_{eb,min}$ ) divides  $F_{Met}$  into a diffusive ( $F_{s,diff}$ , red filled region) and an ebullitive ( $F_{s,ebul}$ , cyan filled region) flux.  $F_{s,AeOM}$  and  $F_{w,AeOM}$  are the CH<sub>4</sub> oxidation in the sediment and water column, respectively.  $F_{diss}$  is the dissolution of the gas bubbles during transport through the water column.  $F_{diff}$  and  $F_{ebul}$  are diffusive and ebullitive CH<sub>4</sub> fluxes through the water-air interface, respectively. *i* and *j* are the indexes of water layers and sediment columns. Note that the sediment column pertaining to a particular water layer has the same index as that water layer.**

Within the lake sediment, CH<sub>4</sub> dynamics are determined by the balance between CH<sub>4</sub> production via methanogenesis and CH<sub>4</sub> migration to the water column through diffusive and ebullitive transport:

$$\frac{\partial \overline{CH_{4,s}}(z)}{\partial t} = \overline{F_{Met}}(z) - \overline{F_{s,diff}}(z) - \overline{F_{s,ebul}}(z) \quad (9)$$



$$\widetilde{F_{Met}}(z) = f_{mm} \frac{M_{CH4}}{M_C} \overline{F_{Min}} \frac{V_s(z)}{V_{s,tot}} \quad (10)$$

where the tilde overbar here represents the volume-integrated stocks or fluxes in the sediment column, which is different from the straight overbar for volume-integrated values in the water column. Note that we have sediment columns at different water depths, such that the stocks and fluxes are represented as a function of water depth  $z$ , which is characterized by the valley-shape model set-up and different from the conventional bucket shape set-up.  $\widetilde{CH_{4,s}}(z)$  is thus the volume-integrated  $CH_4$  stock for the sediment column with the sediment-water interface positioned at depth  $z$  (g  $CH_4$ ).  $\widetilde{F_{Met}}(z)$  is the volume-integrated flux of  $CH_4$  production through the entire sediment column with a sediment-water interface at depth  $z$  (g  $CH_4$  d<sup>-1</sup>), and  $\widetilde{F_{s,diff}}(z)$  and  $\widetilde{F_{s,ebul}}(z)$  are volume-integrated diffusive and ebullition fluxes (g  $CH_4$  d<sup>-1</sup>) through the sediment-water interface at depth  $z$ , respectively.  $f_{mm}$  denotes the fraction of organic matter mineralization that proceeds via methanogenesis according to data compiled by Hanson *et al.* (2014) and Bastviken (2022).  $M_{CH4}/M_C$  is a conversion factor corresponding to the molar ratio of  $CH_4$  to  $C_{OC,auto}$ . As  $f_{mm} \frac{M_{CH4}}{M_C} \overline{F_{Min}}$  is the total  $CH_4$  production flux integrated over the whole water column, we assume that the fractions of  $CH_4$  production occurring in different sediment columns are set according to their volume proportions, i.e.,  $\frac{V_s(z)}{V_{s,tot}}$ .

The partitioning of  $CH_4$  production into ebullitive and diffusive fluxes depends on the porewater  $CH_4$  concentration or its partial pressure, which relies mainly on the vertical distribution of  $CH_4$  production rate in the sediment as well as the oxygen concentration (but is of second-order importance). Based on the observation-based assumption that the organic carbon concentration and thus mineralization rates exponentially decrease with sediment depth, we here assume an

340 exponentially decreasing relationship between methanogenesis rate versus depth (Fig. 3), following  
 341 Langenegger *et al.* (2019):

$$342 \quad f_{met}(z, z_s) = F_{Met,0}(z) \exp(-\alpha z_s) \quad (11)$$

343 where  $f_{met}(z, z_s)$  is the methanogenesis rate ( $\text{g CH}_4 \text{ m}^{-3} \text{ d}^{-1}$ ) at sediment depth  $z_s$  for the sediment  
 344 column with the sediment-water interface positioned at depth  $z$ .  $F_{Met,0}(z)$  is the maximum  $\text{CH}_4$   
 345 production at the sediment-water interface ( $\text{g CH}_4 \text{ m}^{-3} \text{ d}^{-1}$ ) at depth  $z$ , and  $\alpha$  is a shape parameter  
 346 ( $\text{m}^{-1}$ ) that controls the decrease of methanogenesis rate with depth. As the shape of this curve  
 347 typically depends on the flux of labile carbon settling on the lake bottom, and thus, lake trophic  
 348 status, the parameter  $\alpha$  is here scaled by the  $F_{PP}$  empirically:

$$349 \quad \alpha = \alpha_{min} + \beta \cdot F_{PP} \frac{V_w}{V_{phot}} \quad (12)$$

350 where  $\alpha_{min}$  is the minimum or base value, and  $\beta$  is the dependence of  $\alpha$  on  $F_{PP}$ . The values of  $\alpha_{min}$   
 351 and  $\beta$  are determined based on the measurements in lakes of different trophic status reported by  
 352 Langenegger *et al.* (2019).

353 To determine the maximum  $\text{CH}_4$  production  $F_{Met,0}(z)$ , the integral of  $\text{CH}_4$  production rate over  
 354 sediment column should equal to the volume-integrated  $\text{CH}_4$  production flux  $\widetilde{F_{Met}}(z)$  as specified  
 355 by Eq. (10):

$$356 \quad A_s(z) \int_0^{h_s} f_{met}(z, z_s) dz_s = \widetilde{F_{Met}}(z) \quad (13)$$

357 where  $A_s(z)$  is the surface area of sediment column in contact with the water layer at lake depth  $z$   
 358 and is determined by difference in the areas of two adjacent water layers  $A(z)$  (Eq. (1)). The

359 maximum CH<sub>4</sub> production at depth  $z$ ,  $F_{Met,0}(z)$ , can be obtained by combining Equations (10), (11)  
 360 and (13):

$$361 \quad F_{Met,0}(z) = \frac{\widetilde{F_{Met}}(z)}{A_s(z)} \frac{\alpha}{1 - \exp(-\alpha h_s)} \quad (14)$$

362

363 Since CH<sub>4</sub> production increases the *in-situ* CH<sub>4</sub> concentration as the sediment depth increases,  
 364 the CH<sub>4</sub> concentration may exceed its solubility concentration and methane gas bubbles may start  
 365 forming (Fig. 3). To constrain the partitioning of CH<sub>4</sub> production between diffusion and ebullition,  
 366 the threshold sediment depth,  $z_{eb,min}$ , at which CH<sub>4</sub> concentration starts to exceed the solubility limit,  
 367 is determined based on the equilibrium pressure condition following Langenegger *et al.* (2019) (see  
 368 details in Supplementary Text S2). In the upper portion of the sediment column ( $z_s < z_{eb,min}$ ), the  
 369 produced CH<sub>4</sub> will diffuse into water; however, a fraction of the diffusing CH<sub>4</sub> will be oxidized in  
 370 the transit through the upper sediment column, and only the remaining CH<sub>4</sub> will reach the sediment-  
 371 water interface. The volume-integrated CH<sub>4</sub> oxidation in the sediment at depth  $z$ ,  $\widetilde{F_{s,AeOM}}(z)$ , is here  
 372 assumed to be controlled by the O<sub>2</sub> concentration in the overlying bottom water, and is represented  
 373 by a Michaelis-Menten function:

$$374 \quad \widetilde{F_{s,AeOM}}(z) = \widetilde{F_{Met}}(z) \frac{[O_2]_z}{K_{s,O_2} + [O_2]_z} \quad (15)$$

375 where  $K_{s,O_2}$  is the half-saturation constant of O<sub>2</sub> for the sedimentary CH<sub>4</sub> oxidation. As a result, the  
 376 diffusive flux passing through the sediment-water interface is determined as follows:

$$377 \quad \widetilde{F_{s,diff}}(z) = A_s(z) \int_0^{z_{eb,min}} F_{Met,0}(z) \exp(-\alpha z_s) dz_s - \widetilde{F_{s,AeOM}}(z) \quad (16)$$

378 In the lower portion of the sediment column ( $z_s > z_{eb,min}$ ; where oversaturation occurs), the  
 379 produced  $CH_4$  feeds the ebullitive flux, with the volume-integrated value  $\widetilde{F_{s,ebul}}(z)$  (g  $CH_4$  d<sup>-1</sup>) as  
 380 given by:

$$381 \quad \widetilde{F_{s,ebul}}(z) = A_s(z) \int_{z_{eb,min}}^{h_s} F_{Met,0}(z) \exp(-\alpha z_s) dz_s \quad (17)$$

382 Note that Equations. (16) and (17) implicitly imply that, at the monthly resolution of our model, the  
 383  $CH_4$  dynamics in the sediment is at steady state and all the  $CH_4$  produced during this time interval  
 384 is either oxidized or released through the water column via diffusive and ebullitive pathways.

385

386 Pelagic, dissolved  $CH_4$  diffuses in the water column and its concentration is determined by the  
 387 diffusive  $CH_4$  flux passing through the sediment-water interface (acting as a source for each water  
 388 layer), by aerobic  $CH_4$  oxidation in the water column, and by the re-dissolution of the ebullitive  $CH_4$   
 389 fluxes during transit through the water column. The mass conservation equation of dissolved  $CH_4$  is  
 390 then given by:

$$391 \quad \frac{\partial [CH_4]_w}{\partial t} = \frac{\partial}{\partial z} \left( K_{diff} \frac{\partial [CH_4]_w}{\partial z} \right) + \widetilde{F_{s,diff}}(z) \frac{1}{A(z)dz} - F_{w,AeOM}(z) + F_{diss}(z) \quad (18)$$

392 where  $[CH_4]_w$  is the pelagic  $CH_4$  concentration (g  $CH_4$  m<sup>-3</sup>) and  $K_{diff}$  is the eddy diffusion coefficient  
 393 of  $CH_4$  in water (m<sup>2</sup> d<sup>-1</sup>).  $\widetilde{F_{s,diff}}(z) \frac{1}{A(z)dz}$  is the change of  $CH_4$  concentration induced by diffusive  
 394 inputs from the sediment columns, the term  $A(z)dz$  being the volume of the water layer connected  
 395 to the corresponding sediment column.  $F_{w,AeOM}(z)$  is the aerobic  $CH_4$  oxidation rate in the water  
 396 column, and is described through double Michaelis-Menten reaction kinetics (Stepanenko *et al.*,  
 397 2016; Liikanen *et al.*, 2002; Thottathil and Prairie, 2019):

$$F_{w, AeOM}(z) = k_{max} Q_{10, ox}^{\frac{T-T_r}{10}} \frac{[CH_4]_{w,z}}{K_{s, CH_4} + [CH_4]_{w,z}} \frac{[O_2]_z}{K_{s, O_2} + [O_2]_z} \quad (19)$$

where  $k_{max}$  is the maximum CH<sub>4</sub> oxidation rate (Liikanen et al. 2002),  $T$  is the water temperature,  $T_r$  is the reference temperature, and  $Q_{10, ox}$  expresses the temperature dependency of the CH<sub>4</sub> oxidation rate.  $K_{s, CH_4}$  and  $K_{s, O_2}$  are the half-saturation constants for CH<sub>4</sub> and O<sub>2</sub>, respectively.

To constrain the redissolution of gas bubbles ( $F_{diss}(z)$ ), we follow the approach proposed by McGinnis *et al.* (2006) where a function ( $f_{bdiss}(z)$ ) is used to represent the fraction of the benthic ebullitive CH<sub>4</sub> flux that redissolves in the water column during gas ascent. This fraction is a function of water depth and gas bubble diameter, and the latter was set to 5 mm following Delwiche and Hemond (2017). With this function  $f_{bdiss}(z)$ , the redissolved CH<sub>4</sub> fluxes from sediment column at depth  $z$  are assumed to be evenly redistributed in the water layers above the sediment, i.e.,

$$f_{rediss}(z) = \frac{f_{bdiss}(z) \widetilde{F_{s,ebul}}(z)}{\int_0^z A(z) dz} \quad (20)$$

where  $\int_0^z A(z) dz$  is the water volume above the sediment layer at the depth of interest  $z$ . Then, at this particular depth  $z$ , the redissolution flux ( $F_{diss}$ , g CH<sub>4</sub> m<sup>-3</sup> d<sup>-1</sup>) is thus determined as follows:

$$F_{diss}(z) = \int_z^{h_{max}} f_{rediss}(z) dz \quad (21)$$

where  $\int_z^{h_{max}} f_{rediss}(z) dz$  represents the integral of all re-dissolved ebullitive fluxes from sediment columns below  $z$ .

By deducing this dissolution flux from the ebullitive flux released from lake sediments, the resultant ebullitive flux reaching the atmosphere ( $F_{ebul}$ ; g CH<sub>4</sub> m<sup>-2</sup> d<sup>-1</sup>) is calculated as:

$$F_{ebul} = \frac{1}{A_0} \int_0^{h_{max}} \left(1 - f_{bdiss}(z)\right) \widetilde{F_{s,ebul}}(z) dz \quad (22)$$

417 where  $A_0$  is the lake surface area, and  $(1-f_{bdiss}(z))\widetilde{F_{s,ebul}}(z)$  is the component of ebullitive flux at  
418 depth  $z$  that reaches the atmosphere.

419 In addition to diffusive and ebullitive pathways, FLaMe-v1.0 also calculates a storage flux ( $F_{stor}$ )  
420 that encapsulates the changes in the total  $\text{CH}_4$  mass stored in hypolimnion due to the weakening of  
421 lake stratification or turnover events when the lake surface temperature approaches the critical  
422 temperature  $4^\circ\text{C}$  (MacKay, 2012; MacKay *et al.*, 2017). This results in a full mixing of the lake that  
423 releases the previously accumulated  $\text{CH}_4$  in the anoxic portion of the lake and concomitantly fully  
424 aerates the water column. Lake turnovers thus lead to a complete homogenization of  $\text{O}_2$  and  $\text{CH}_4$   
425 concentration across the vertically resolved water column. Before lake turnover, the lake water is  
426 highly stratified, blocking the material exchange between upper and lower water layers, such that  
427 bottom water has high  $\text{CH}_4$  concentration (even oversaturated) and low  $\text{O}_2$ , while the upper water  
428 has high  $\text{O}_2$  concentration and low  $\text{CH}_4$  concentration. Upon full mixing, remobilization of larger  
429  $\text{CH}_4$  stocks that accumulated in the hypolimnion abruptly increase the  $\text{CH}_4$  concentration near the  
430 lake surface, and hence strongly enhance the diffusive flux through the air-water interface; in the  
431 meantime,  $\text{O}_2$  in the upper layers can penetrate to deep water layers and start oxidizing the  $\text{CH}_4$   
432 throughout the entire water column. After full mixing, the  $\text{CH}_4$  emissions and oxidation are both  
433 simulated based on  $\text{O}_2$  and  $\text{CH}_4$  concentrations within each water layers. That is, the storage flux in  
434 FLaMe-v1.0 is not simulated separately but it is implicitly incorporated into the diffusive flux  $F_{diff}$   
435 which increases dramatically following the formation of a very sharp  $\text{CH}_4$  concentration gradient at  
436 the lake surface.

### 437 2.2.2.3 Oxygen module

438 The oxygen module is needed to simulate the lake methane processes (section 2.2.2.2). It  
 439 represents the O<sub>2</sub> cycle within the water column, driven by O<sub>2</sub> production by photosynthesis, O<sub>2</sub>  
 440 consumption by pelagic and benthic OC mineralization, and aerobic pelagic and benthic CH<sub>4</sub>  
 441 oxidation. These processes are coupled to the vertical diffusive transport of O<sub>2</sub> through water column  
 442 (Fig. 4). The one-dimensional conservation equation for O<sub>2</sub> concentration in the water column is  
 443 thus given by:

$$444 \quad \frac{\partial [O_2]}{\partial t} = \frac{\partial}{\partial z} \left( K_{diff} \frac{\partial [O_2]}{\partial z} \right) + OF_{PP}(z) - OF_{w,Aer}(z) - \frac{1}{A(z)dz} \widetilde{OF_{s,Aer}}(z) - OF_{w,AeOM}(z) - OF_{s,AeOM}(z) \quad (23)$$

445 where [O<sub>2</sub>] is the O<sub>2</sub> concentration in the water (g O<sub>2</sub> m<sup>-3</sup>), and  $K_{diff}$  is the eddy diffusion coefficient  
 446 of O<sub>2</sub> (m<sup>2</sup> d<sup>-1</sup>), assumed identical to that of CH<sub>4</sub>.  $OF_{PP}(z)$  is the oxygen production through primary  
 447 production (g O<sub>2</sub> m<sup>-3</sup> d<sup>-1</sup>) at depth  $z$ .  $OF_{w,Aer}(z)$  is the O<sub>2</sub> consumption by heterotrophic respiration  
 448 (g O<sub>2</sub> m<sup>-3</sup> d<sup>-1</sup>) in the water column at depth  $z$ , while  $\widetilde{OF_{s,Aer}}(z)$  is the volume-integrated O<sub>2</sub>  
 449 consumption by heterotrophic respiration in the sediment (g O<sub>2</sub> m<sup>-3</sup> d<sup>-1</sup>), and  $A(z)dz$  is the volume  
 450 of the water layer connected to the corresponding sediment column.  $OF_{w,AeOM}(z)$  and  $OF_{s,AeOM}(z)$  are  
 451 the aerobic CH<sub>4</sub> oxidation in the water column and sediment (g O<sub>2</sub> m<sup>-3</sup> d<sup>-1</sup>), respectively, at depth  
 452  $z$ .

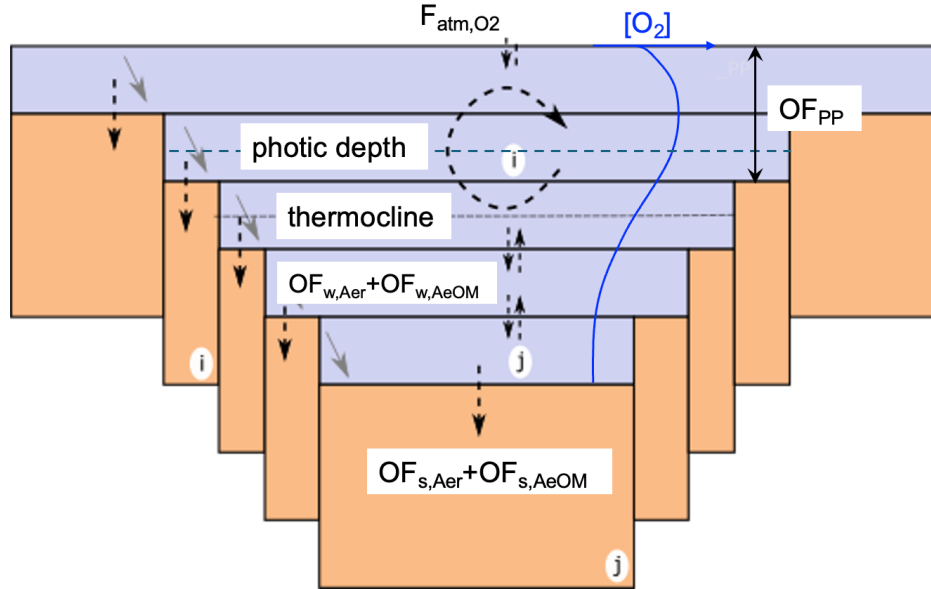

**Fig. 4. Illustration of the oxygen ( $O_2$ ) module in the FLAME-v1.0. The  $O_2$  production due to primary production occurs only in the photic zone ( $OF_{PP}$ ), while the  $O_2$  consumption by heterotrophic respiration occurs in both the entire pelagic zone and benthic zone ( $OF_{w,Aer}$  and  $OF_{s,Aer}$ ). The  $O_2$  consumption due to  $CH_4$  oxidation occurs also in both pelagic and benthic zones ( $OF_{w,AeOM}$  and  $OF_{s,AeOM}$ ). In this figure, the dotted arrows crossing the sediment-water interface represent the  $O_2$  demands in sediments ( $OF_{s,Aer}$  and  $OF_{s,AeOM}$ ), the dashed arrows represent the eddy diffusion of  $O_2$  between water layers and through the water-air interface, and the tilted grey arrows represent the aerobic oxidation of  $CH_4$  in the water column. As a result, the blue curve depicts a typical vertical profile of  $O_2$  concentration under lake water stratification.**

Photosynthesis occurs only in the photic zone, and the amount of  $O_2$  produced by primary production  $\overline{OF_{PP}}$  (volume-integrated value;  $g\ O_2\ d^{-1}$ ) can be determined according to the stoichiometric ratio  $M_{O_2}/M_C$ , where  $M_{O_2}$  and  $M_C$  are the molar masses of oxygen and carbon, respectively. To resolve the vertical  $O_2$  profile, the  $O_2$  produced during primary production is assumed to be evenly redistributed within the water layers above the photic depth (Fig. 4):



$$OF_{PP}(z) = \begin{cases} \overline{F_{PP}} \frac{1}{V_{phot}} \frac{M_{O_2}}{M_C}, & z < z_{phot} \\ 0, & z \geq z_{phot} \end{cases} \quad (24)$$

where  $V_{phot}$  is the photic volume.

The oxygen consumption induced by  $CH_4$  oxidation in the sediment and water column can be calculated from corresponding  $CH_4$  fluxes (Eqs. (15) and (19), respectively) and the stoichiometry of the reactions involved:

$$OF_{s,AeOM}(z) = \frac{2M_{O_2}}{M_{CH_4}} F_{s,AeOM}(z) \quad (25)$$

$$OF_{w,AeOM}(z) = \frac{2M_{O_2}}{M_{CH_4}} F_{w,AeOM}(z) \quad (26)$$

As in Eq. (10), a fraction of the mineralized organic carbon (represented by  $f_{mm}$ ) is channeled into the methanogenesis pathway according to the data compiled by Hanson *et al.* (2014) and Bastviken (2009). Thus, the remaining fraction ( $1-f_{mm}$ ) of the total mineralization  $\overline{F_{Min}}$  is channeled into the aerobic metabolic pathway ( $F_{Aer}$ ). As a result, the *bulk volumetric rate* of oxygen consumption due to the aerobic metabolic activity ( $OF_{Aer}$ ) can be represented by the fraction  $1-f_{mm}$  and the volume-integrated mineralization  $\overline{F_{Min}}$ :

$$OF_{Aer} = (1-f_{mm}) \overline{F_{Min}} \frac{1}{V_w} \frac{M_{O_2}}{M_C} \quad (27)$$

In the sediment, the aerobic mineralization occurs only in the upper oxic layer. The thickness of this aerobic layer is limited by the oxygen penetration depth  $z_{ox}$ . Following Ruardij and Van Raaphorst (1995), this depth  $z_{ox}$  can be derived by solving the steady-state reaction-diffusion equation for  $O_2$  in the sediment:

$$z_{ox} = \sqrt{\frac{2K_{s,diff}}{OF_{s,AeOM} + OF_{Aer}}} \quad (28)$$

486 where  $K_{s,diff}$  is the molecular diffusion coefficient within the sediment, which is dependent on the  
 487 temperature (Ruudij and Van Raaphorst, 1995). The amount of  $O_2$  consumed within the oxic layers  
 488 of the sediment can thus be determined as:

$$489 \quad \widetilde{OF_{s,Aer}}(z) = OF_{Aer} A_s(z) z_{ox} \quad (29)$$

490 where  $A_s(z)$  is the area of the corresponding sediment column at depth  $z$ . To ensure a mass balance,  
 491 the volumetric rate of  $O_2$  consumption due to aerobic metabolism in water can then be calculated  
 492 as follows:

$$493 \quad OF_{w,Aer}(z) = OF_{Aer} - \widetilde{OF_{s,Aer}}(z) \frac{1}{A(z)dz} \quad (30)$$

494 where  $A(z)dz$  is the volume of the water layer connected to the corresponding sediment column, and  
 495 it is used here to convert the sedimentary  $O_2$  consumption into a volumetric rate in the water column.  
 496 Furthermore, following Martin *et al.* (1987), Carlson *et al.* (1994) and Aristegui *et al.* (2003), we  
 497 redistribute the respiration ( $OF_{w,Aer}$ ) within the water column, assuming that 80% of the respiration  
 498 occurs in the photic zone, with the remaining 20%, sustained by the export production, occurs in the  
 499 deeper water layers where it can further degrade.

### 500 2.2.3 Boundary conditions for the transport module

501 The partial differential equations (18) and (23) require boundary conditions to constrain the  
 502 diffusive transport (i.e., the first term on the right-hand side of both equations). At the sediment-  
 503 water interface, a zero-flux boundary condition is imposed, because the diffusive exchanges of  $CH_4$   
 504 and  $O_2$  between the sediment columns and the overlying waters are already included as source/sink  
 505 terms in Eq. (18) and (23). This choice was guided by the valley-shape configuration of our lake set-  
 506 up, and thus by the presence of diffusive  $CH_4$  and  $O_2$  exchange fluxes with sediment in each water

507 layer of our model, a situation in stark contrast from a bucket shape model where only a single  
 508 sediment column would be connected to the bottom water layer.

509 At the lake surface ( $z = 0$  m), the boundary conditions are determined by the  $\text{CH}_4$  and  $\text{O}_2$   
 510 exchange fluxes with the atmosphere, as given by (Wanninkhof et al., 2009; Cole and Caraco, 1998):

$$511 \quad F_{\text{atm},\text{CH}_4} = k_{ge}([\text{CH}_4] - f_{\text{CH}_4,\text{atm}} P_{\text{atm}} M_{\text{CH}_4} K_{H,\text{CH}_4} \exp(\frac{\partial \ln(K_{H,\text{CH}_4})}{\partial T} (\frac{1}{T_l} - \frac{1}{298.15}))) \quad (31)$$

$$512 \quad F_{\text{atm},\text{O}_2} = k_{ge}([\text{O}_2] - f_{\text{O}_2,\text{atm}} P_{\text{atm}} M_{\text{O}_2} K_{H,\text{O}_2} \exp(\frac{\partial \ln(K_{H,\text{O}_2})}{\partial T} (\frac{1}{T_l} - \frac{1}{298.15}))) \quad (32)$$

513 where  $F_{\text{atm},\text{CH}_4}$  and  $F_{\text{atm},\text{O}_2}$  are diffusive fluxes of  $\text{CH}_4$  ( $\text{g CH}_4 \text{ m}^{-2} \text{ d}^{-1}$ ) and  $\text{O}_2$  ( $\text{g O}_2 \text{ m}^{-2} \text{ d}^{-1}$ ) through  
 514 the air-water interface of the lake, respectively.  $f_{\text{CH}_4,\text{atm}}$  and  $f_{\text{O}_2,\text{atm}}$  are molar fractions of  $\text{CH}_4$  and  $\text{O}_2$   
 515 in the atmosphere, respectively, and  $P_{\text{atm}}$  is the atmospheric pressure.  $K_{H,\text{CH}_4}$  and  $K_{H,\text{O}_2}$  are Henry's  
 516 constants of  $\text{CH}_4$  and  $\text{O}_2$  at 298.15 K and  $k_{ge}$  is the piston velocity ( $\text{m s}^{-1}$ ), here constrained from the  
 517 empirical equation reported by Cole and Caraco (1998), as in Tan *et al.* (2015; 2018) and Stepanenko  
 518 *et al.* (2016):

$$519 \quad k_{ge} = (C_{k1} + C_{k2} v_{a,10}^n) \sqrt{\frac{600}{S_{CX}}} \quad (33)$$

520 where  $C_{k1}$ ,  $C_{k2}$  and  $n$  are empirical constants (Cole and Caraco, 1998).  $v_{a,10}$  is the absolute wind  
 521 velocity measured at 10 m above the lake surface ( $\text{m s}^{-1}$ ), and  $S_{c,\text{CH}_4}$  and  $S_{c,\text{O}_2}$  are the Schmidt number  
 522 of  $\text{CH}_4$  and  $\text{O}_2$ , respectively (Wanninkhof *et al.* 2009). Note that more recent formulations of  $k_{ge}$  have  
 523 been published in the last decade (Wanninkhof *et al.* 2014; McIntire et al., 2020) but we here choose  
 524 to use Eq. (33) to be consistent with previous lake modelling studies (Tan et al., 2015; Stepanenko *et*  
 525 *al.* 2016; Tan *et al.*, 2018).

## 526 2.3 Parameter values

527 Table 1 summarizes all physical and biogeochemical parameters, their values, as well as the  
528 original references from which they were extracted. Most of these parameters were either directly  
529 taken from relevant modelling studies or constrained based on comprehensive literature reviews. In  
530 addition, several key parameters of the FLame-v1.0, highlighted in Table 1, were adjusted by  
531 calibrating the model based on observations of lake C fluxes (i.e.,  $F_{PP}$ , diffusive and ebullitive  $\text{CH}_4$   
532 emissions). For instance, the parameters  $P_{\text{Chl,max}}$  and  $K_{s,P}$  control the lake primary production and  
533 were tuned to reproduce broad global patterns of primary production rates across the full range of  
534 lake trophic status (Wetzel, 2001). The mineralization  $k_{20}$  and burial constants  $k_{bur}$  were adjusted  
535 based on the observed fraction of  $C_{\text{OC,auto}}$  that settles onto the lake sediment, either to be decomposed  
536 in anaerobic or oxic conditions or accumulated in the sediment (Hanson *et al.*, 2011, 2014; Maavara  
537 *et al.*, 2019; Mendonça *et al.*, 2017). The temperature dependence of mineralization  $\theta$  was fine-  
538 tuned to reproduce the observational ranges of temperature dependence of net- $\text{CH}_4$  emissions (Aben  
539 *et al.*, 2017).  $f_{mm}$  specifies the fraction of mineralization that channels to the methanogenesis pathway,  
540 which is adjusted to produce the observational patterns of  $\text{CH}_4$  emissions.  $\alpha_{min}$  is the base value of  
541 the exponentially decreasing rate of  $\text{CH}_4$  production versus sediment depth, and controls the split of  
542  $\text{CH}_4$  production between diffusive and ebullitive pathways, which was calibrated to reproduce  
543 observed broad trends of  $F_{tot}$ ,  $F_{ebul}$  and  $F_{diff}$  from the literature (Rinta *et al.*, 2017). The parameter  
544 values listed in Table 1 provide the reference setup for the simulation of lake  $\text{CH}_4$  emissions, and  
545 the sensitivity and uncertainty analyses regarding the key model parameters (indicated by asterisks  
546 in Table 1) is carried out using wide ranges of values covering most possible lake conditions from  
547 the real world (see section 3.3.3).

## 548    **2.4 Numerical solution**

549        In FLAME-v1.0, the physical (i.e., CSLM) and biogeochemical (OC, CH<sub>4</sub> and O<sub>2</sub>) modules are  
550    coupled online. For the dynamics of volume-integrated OC and CH<sub>4</sub> in sediments, the involved  
551    ordinary differential equations are solved using a forward Euler scheme. For the dynamics of  
552    dissolved O<sub>2</sub> and CH<sub>4</sub> concentrations in the water column, the partial differential equations (Eqs.  
553    (18) and (23)) are solved numerically using an explicit central difference scheme for depth and Euler  
554    forward scheme for time. The diffusion coefficient  $K_{diff}$  for both O<sub>2</sub> and CH<sub>4</sub> is set as depth-  
555    dependent (Table 1) to capture the reduced transport when the temperature gradient from the  
556    epilimnion, metalimnion and hypolimnion is well pronounced (Dong et al. 2020; Imboden and  
557    Wuest 1995; Imberger 1985; Bohrer and Schultze 2008).

Table 1. Model parameters of FLAME v1.0 and the choice of their values

| Main processes                              | Key model parameters | Physical meanings (units)                                                                                 | Values                  | Ranges                        | Equations | References                       |
|---------------------------------------------|----------------------|-----------------------------------------------------------------------------------------------------------|-------------------------|-------------------------------|-----------|----------------------------------|
| Lake morphology                             | $s$                  | Steepness of lakebed (-)                                                                                  | 2                       | /                             | (1)       | -                                |
| Primary production                          | $P_{chl,max}$        | Maximum carbon fixing rate per unit of Chlorophyll-a (mg C (mg Chl-a) <sup>-1</sup> h <sup>-1</sup> )     | 0.5*                    | 0.5–6                         | (3)       | Behrenfeld and Falkowski (1997)  |
|                                             | $K_{s,P}$            | Half saturation coefficient of total dissolved phosphorus for the primary production (g m <sup>-3</sup> ) | 0.09*                   | 0.006–0.18                    | (3)       | Maavara <i>et al.</i> , (2017)   |
|                                             | $Q_{10,prod}$        | Temperature sensitivity for the primary production                                                        | 2                       | 1.8–2.25                      | (4)       | Lewis (2001) and Reynolds (2006) |
|                                             | $k_c$                | Absorbance of PAR per unit of chlorophyll-a (m <sup>2</sup> (g Chl-a) <sup>-1</sup> )                     | 0.014 × 10 <sup>3</sup> | (0.01–0.02) × 10 <sup>3</sup> | (5)       | Lewis (2001) and Reynolds (2006) |
|                                             | $PP/RP$              | ratio of maximum gross photosynthesis to respiration per unit chlorophyll-a (-)                           | 15                      | /                             | (5)       | Lewis (2001) and Reynolds (2006) |
|                                             | $PAR_k$              | PAR at the onset of photo saturation (μmol m <sup>-2</sup> s <sup>-1</sup> )                              | 120                     | 90–250                        | (5)       | Lewis (2001) and Reynolds (2006) |
|                                             | $K_{dw}$             | PAR attenuations due to pure water (m <sup>-1</sup> )                                                     | 0.13                    | 0.12–0.20                     | (5)       | Lewis (2001) and Reynolds (2006) |
|                                             | $K_{dp}$             | PAR attenuations due to suspended particulate matter (m <sup>-1</sup> )                                   | 0.06                    | 0.05–4                        | (5)       | Lewis (2001) and Reynolds (2006) |
| Mineralization and burial of organic carbon | $k_{20}$             | Mineralization rate at a reference temperature of 20 °C (d <sup>-1</sup> )                                | 0.008*                  | 0.003–0.015                   | (7)       | Maavara <i>et al.</i> , (2017)   |
|                                             | $\theta$             | Temperature dependence of mineralization                                                                  | 1.02*                   | 1.01–1.07                     | (7)       | Maavara <i>et al.</i> , (2017)   |

|                                                                 |                |                                                                                                                  |                                                                                                      |                              |               |  |                                               |
|-----------------------------------------------------------------|----------------|------------------------------------------------------------------------------------------------------------------|------------------------------------------------------------------------------------------------------|------------------------------|---------------|--|-----------------------------------------------|
|                                                                 | $k_{bur}$      | Carbon burial rate in the lake ( $d^{-1}$ )                                                                      | 0.004*                                                                                               | $1/2k_{20}$                  | (8)           |  | Mendonca <i>et al.</i> , (2017)               |
|                                                                 | $f_{mm}$       | Fraction of mineralization that channels to the methanogenesis pathway                                           | 1/4*                                                                                                 | 1/6–1/2                      | (10) and (27) |  | Hanson <i>et al.</i> (2014); Bastviken (2009) |
| <b>CH<sub>4</sub> oxidation</b>                                 | $k_{max}$      | Maximal rate of CH <sub>4</sub> oxidation ( $g\ CH_4\ m^{-3}\ d^{-1}$ )                                          | 0.69                                                                                                 | 0.19–7.68                    | (19)          |  | Liikanen <i>et al.</i> (2002)                 |
|                                                                 | $Q_{10,ox}$    | Temperature dependence of CH <sub>4</sub> oxidation (-)                                                          | 1.2                                                                                                  | 1.1–2.0                      | (19)          |  | Liikanen <i>et al.</i> (2002)                 |
|                                                                 | $K_{s,CH4}$    | Half-saturation constant for CH <sub>4</sub> ( $g\ CH_4\ m^{-3}$ )                                               | 0.6                                                                                                  | /                            | (19)          |  | Stepanenko <i>et al.</i> (2016)               |
|                                                                 | $K_{s,O2}$     | Half-saturation constant for O <sub>2</sub> ( $g\ O_2\ m^{-3}$ )                                                 | 0.67                                                                                                 | /                            | (19)          |  | Liikanen <i>et al.</i> (2002)                 |
| <b>Shape parameter of sedimentary CH<sub>4</sub> production</b> | $\alpha_{min}$ | Base value of the exponentially decreasing rate of CH <sub>4</sub> production versus sediment depth ( $m^{-1}$ ) | 10*                                                                                                  | 10–70                        | (12)          |  | Langenegger <i>et al.</i> , (2019)            |
| <b>Gas transport in the water column and exchange with air</b>  | $K_{diff}$     | Depth-dependent eddy-diffusion coefficient ( $m^2\ d^{-1}$ )                                                     | 8.64 (epilimnion), $8.64 \times 10^{-3}$ at the thermocline, and $8.64 \times 10^{-1}$ (hypolimnion) | $8.64 \times 10^{-2}$ –1.728 | (18) and (23) |  | Stefan and Fang (1994)                        |
|                                                                 | $C_{k1}$       | Empirical constant for piston velocity ( $m\ s^{-1}$ )                                                           | $5.75 \times 10^{-6}$                                                                                | /                            | (33)          |  | Cole and Caraco, (1998)                       |
|                                                                 | $C_{k2}$       | Empirical constant for piston velocity ( $m\ s^{-1}$ )                                                           | $5.97 \times 10^{-7}$                                                                                | /                            | (33)          |  | Cole and Caraco, (1998)                       |
|                                                                 | $n$            | Empirical constant for piston velocity                                                                           | 1.7                                                                                                  | /                            | (33)          |  | Cole and Caraco, (1998)                       |
|                                                                 | $S_{c,CH4}$    | Schmidt number of CH <sub>4</sub> (-)                                                                            | 677                                                                                                  | /                            | (33)          |  | Wanninkhof <i>et al.</i> (2009)               |

|  |                |                                                   |                        |   |      |                                    |
|--|----------------|---------------------------------------------------|------------------------|---|------|------------------------------------|
|  | $S_{c,O_2}$    | Schmidt number of O <sub>2</sub> (-)              | 589                    | / | (33) | Wanninkhof<br><i>et al.</i> (2009) |
|  | $f_{CH_4,atm}$ | Atmospheric molar fractions<br>of CH <sub>4</sub> | $0.18 \times 10^{-13}$ | / | (31) | Lan <i>et al.</i><br>(2024)        |
|  | $f_{O_2,atm}$  | Atmospheric molar fractions<br>of O <sub>2</sub>  | 0.2095                 | / | (32) | Gatley <i>et al.</i><br>(2008)     |

559

\* indicates that the original parameter values are from the literature, and further adjusted by calibration

560

versus observations. Moreover, their values are varied for the sensitivity analysis in section 3.3.3.

561

/ indicates that the ranges of the parameter values are not reported.



## 562 2.5 Case studies

563 We implemented three case studies to assess the performance of FLaMe-v1.0 in simulating lake  
564 CH<sub>4</sub> emissions, as well as its application to the European scale. First, we present theoretical  
565 simulations for two representative cases (methodological details in section 2.5.1) to assess the general  
566 behaviors of FLaMe-v1.0 in capturing the physical-biogeochemical patterns of contrasted lakes. Then,  
567 we perform the simulations for four well-surveyed real lakes to assess the model's capability in  
568 capturing the observed temporal variations of CH<sub>4</sub> fluxes (section 2.5.2). Next, we apply FLaMe-v1.0  
569 to the entire European domain to assess the model's capability in reproducing the spatial patterns and  
570 seasonal variations of CH<sub>4</sub> fluxes at continental scale (section 2.5.3). The European scale application  
571 can be considered as a “proof of concept” in support of our proposed modeling strategy. Finally, we  
572 examine the sensitivity to key model parameters and assess the uncertainty of the continental-scale  
573 emissions using the samples produced by sensitivity analysis, combined with a machine learning  
574 approach (section 2.5.4).

### 575 2.5.1 Two theoretical representative lakes for testing FLaMe-v1.0 performance

576 To test if the FLaMe-v1.0 can capture the contrast patterns in physical-biogeochemical behaviors  
577 across shallow vs. deep, eutrophic vs. oligotrophic and warm vs. cold lakes, we set-up the model for  
578 two theoretical representative lakes: a “deep oligotrophic” lake ( $h_{max} = 35$  m or  $h_{mean} = 17.5$  m and  
579  $[TP] = 3 \mu\text{g } P \text{ L}^{-1}$ ) driven by a “cold” climate ( $63.75^\circ N$ ,  $26.25^\circ E$ ; Fig. S1) and a “shallow eutrophic”  
580 lake ( $h_{max} = 10$  m or  $h_{mean} = 5$  m and  $[TP] = 80 \mu\text{g } P \text{ L}^{-1}$ ) driven by a “warm” climate ( $43.75^\circ N$ , -  
581  $6.25^\circ E$ ; Fig. S2). The lake areas of these two theoretical lakes were set as  $5 \text{ km}^2$ , which was tested to  
582 have limited effects on the simulation results. For these two theoretical representative cases, FLaMe-  
583 v1.0 simulates the spatio-temporal evolutions of physical and biogeochemical variables and fluxes,

including primary production and mineralization fluxes, and labile autochthonous OC stocks as well as the vertically resolved gradients of temperature, CH<sub>4</sub> and O<sub>2</sub> concentrations. Furthermore, we also compared the seasonal patterns of CH<sub>4</sub> productions and emissions for these two contrasting lakes. To investigate further how environmental factors affect the model behavior, we further decompose the collective responses of shallow and deep lakes into individual effects induced by trophic level, climate (Fig. S1–S3) and lake depth using hypothetical numerical simulations, i.e., (i) changing the maximal lake depth ( $h_{max}$ ) from 5 to 25 m; (ii) increasing the [TP] levels from 8 to 80  $\mu\text{g P L}^{-1}$ ; and (iii) changing the climate from warm (43.75°N, -6.25°E; Fig. S1) to cold conditions (63.75°N, 26.25°E; Fig. S2).

### 2.5.2 Simulations of temporal patterns for four well-surveyed lakes

To evaluate the ability of FLaMe-v1.0 to reproduce the observed temporal patterns of CH<sub>4</sub> fluxes, we selected four lakes from the Inter-Sectoral Impact Model Intercomparison Project (ISIMIP) lake datasets for which monthly resolved temporal CH<sub>4</sub> fluxes were available (Tan *et al.*, 2024). These lakes cover different lake depths, areas, climate conditions and trophic statuses, as summarized in Table 2. Since *in-situ* measurements of climatic drivers are not available for these lakes, we extracted them from the 0.5°x0.5° GSWP3-W5E5 global climate forcings released by the ISIMIP3a project as an approximation. The measurements of CH<sub>4</sub> fluxes for these lakes were mostly collected during the first 20 years of the 21<sup>st</sup> century, and we thus selected the climate forcings for the period 1991–2019, using the period 1991–1999 as spin-up phase. Since the lack of concomitant *in-situ* measurements of climatic drivers and variations in lake water levels affect the model’s ability to capture the full variability in the time-series of observed CH<sub>4</sub> emission time series, we here focus our evaluation on the magnitudes and broad seasonal patterns in observed CH<sub>4</sub> emissions, following what can be

606 achieved for regional and global scale applications. Thus, we evaluated the simulated statistics (mean  
607 and SD represented by boxplots) of CH<sub>4</sub> fluxes over the annual cycle against the observational data.

608

609 **Table 2. Characteristic information for the four well-surveyed lakes from ISIMIP**  
610 **datasets**

| Lake                | Coordinates         | Lake depth                     | Lake area<br>(km <sup>2</sup> ) | Climate              | Trophic status | Temporal coverage | Spatio-temporal resolution |
|---------------------|---------------------|--------------------------------|---------------------------------|----------------------|----------------|-------------------|----------------------------|
| <b>Klöntal</b>      | 47.026N,<br>8.981E  | 21.4m (mean),<br>45m (max)     | 2.25                            | Temperate            | Oligotrophic   | Annual mean       | Site; monthly              |
| <b>Erssjön</b>      | 58.371N,<br>12.162E | 1.3m<br>(mean), 4.75m<br>(max) | 0.062                           | Temperate-<br>Boreal | Mesotrophic    | 2012–<br>2013     | Site; bi-weekly            |
| <b>Upper Mystic</b> | 42.434N,<br>71.150W | 11.7m (mean),<br>25m (max)     | 0.58                            | Temperate            | Eutrophic      | 2007–<br>2008     | Site; weekly               |
| <b>Villasjön</b>    | 68.35N,<br>19.03E   | 1.3 m (max)                    | 0.17                            | Boreal               | Oligotrophic   | 2010–<br>2017     | Site; daily                |

### 611 2.5.3 Implementation of FLaMe-v1.0 at continental scale

612 To implement the model at the scale of Europe (25°W–60°E, 36°–71°N), we extracted the  
613 natural lakes (type I) within this domain from the HydroLAKES database (Messenger *et al.*, 2016;  
614 n=108407, total area = 1.33x10<sup>5</sup> km<sup>2</sup> for lakes with 0.1≤A<sub>0</sub>≤1000 km<sup>2</sup> within the European domain).  
615 Following our clustering strategy, we subdivided, within each grid cell, all lakes into four classes  
616 based on their surface area (0.1 < A<sub>0</sub> < 1 km<sup>2</sup>, 1 < A<sub>0</sub> < 10 km<sup>2</sup>, 10 < A<sub>0</sub> < 100 km<sup>2</sup>, and 100 < A<sub>0</sub> < 1000  
617 km<sup>2</sup>). As FLaMe-v1.0 was derived from the small lake physics model CSLM, we here only  
618 considered the lakes with an area smaller than 1000 km<sup>2</sup>, and excluded the very large lakes (A<sub>0</sub> > 1000  
619 km<sup>2</sup>) that account for 40% of the total European lake surface area (but only consist of 21 lakes).

620 Within our model domain, we have 108407 lakes with a surface area larger than  $0.1 \text{ km}^2$ , which at  
621 spatial resolution of  $2.5^\circ$  (Fig. S4–S5) result in 365 grid cells and 953 representative lakes  
622 (hence reducing computation cost by more than a factor of 100 compared to a case where each  
623 individual lake would be simulated). By parallelizing the model simulations on a high-performance  
624 cluster, the implementation of FLaMe-v1.0 for the entire European domain consumes approximately  
625 365 CPU hours for a single run covering 10 years.

626 The FLaMe-v1.0 was forced by meteorological conditions from the GSWP3-W5E5 reanalysis  
627 product under ISIMIP3a (Frieler *et al.*, 2024) (Fig. S6), including shortwave solar radiation ( $\text{W m}^{-2}$ ),  
628 longwave solar radiation ( $\text{W m}^{-2}$ ), precipitation ( $\text{mm s}^{-1}$ ), near surface air temperature (at 10 m  
629 height,  $^\circ\text{C}$ ), specific humidity ( $\text{kg kg}^{-1}$ ), near surface wind velocity (at 10m,  $\text{m s}^{-1}$ ), and atmospheric  
630 pressure (Pa). As these forcings were provided at a finer spatial resolution of  $0.5^\circ$ , we only applied  
631 the values in the central  $0.5^\circ$  grid cell of our larger  $2.5^\circ$  grid. In addition, the FLaMe-v1.0 was also  
632 driven by the TP in the representative lakes (Fig. S7–S8), which was estimated by dividing the TP  
633 mass outflow by the water discharge reported in HydroLAKES, hence assuming that the lake water  
634 is well mixed. The TP mass outflow from each lake in HydroLAKES was obtained by routing the  
635 TP loads (extracted from the GlobalNEWS model; Mayorga *et al.*, (2010)) from the watershed (point  
636 and non-point terrestrial sources) into the river network, following the procedure outlined in  
637 Lauerwald *et al.* (2019) and topological information provided by the HydroSHEDS drainage  
638 network. More details related to the TP routing can be found in Bouwman and Billen (2009), Van  
639 Drecht *et al.* (2009), and Mayorga *et al.* (2010).

640 To validate the FLAME-v1.0 for European lakes, we will evaluate the simulated  $F_{PP}$  and  $\text{CH}_4$   
641 emission rates against the ranges/values reported in the literature and/or from observations. First,  
642 the simulated  $F_{PP}$  will be evaluated against empirical ranges reported by Wetzell (2001) for lakes  
643 from ultraoligotrophic ( $0\text{--}5\ \mu\text{gP L}^{-1}$ ), oligotrophic ( $5\text{--}10\ \mu\text{gP L}^{-1}$ ), mesotrophic ( $10\text{--}30\ \mu\text{gP L}^{-1}$ ), to  
644 eutrophic ( $>30\ \mu\text{gP L}^{-1}$ ) conditions. Next, the simulated diffusive and ebullitive  $\text{CH}_4$  emission rates  
645 will be evaluated against *in-situ* measurements compiled by Rinta et al. (2017) from 17 boreal lakes  
646 (in southern Finland and Sweden) and 30 central European lakes (in The Netherlands, Germany and  
647 Switzerland). This dataset is adopted because it can not only differentiate the ebullitive and diffusive  
648  $\text{CH}_4$  fluxes during late summer (August and September, 2010–2011) but also provides information  
649 regarding environmental conditions of the study area (mean annual air temperature, annual  
650 precipitation, percentage of forests and managed land in the catchment) and water chemistry of the  
651 studied lakes (temperature, conductivity, pH, absorbance, TP and TN in surface water, and average  
652 TP and TN in the water column), which are helpful for understanding the lake methane dynamics  
653 within these two contrasted regions. However, this dataset of 47 lakes still has some important  
654 limitations, in particular as it presents only summer-time observations, and not time-series which  
655 would comprise the full seasonal cycle including turnover events and other hot moments. In addition,  
656 it contains potential biases induced by the calculation methods used for separating the measured  
657  $\text{CH}_4$  fluxes into diffusive and ebullitive pathways. In particular, Rinta et al. (2017) used floating  
658 chambers over a relatively short duration (6hr), which might not be able to detect sporadic ebullition  
659 events, and did not employ bubble traps to estimate the ebullitive flux.

#### 660 2.5.4 Sensitivity and uncertainty analysis

661 To explore how model parameterization affects the European-scale assessments of lake CH<sub>4</sub>  
662 emissions, we conducted a sensitivity analysis encompassing the parameters whose variations  
663 induce the largest changes in lake CH<sub>4</sub> dynamics (with the involved parameters indicated by  
664 asterisks in Table 1). The sensitivity was conducted by varying a parameter once at a time: only one  
665 parameter is varied with the other parameters kept unchanged. All these parameters were assumed  
666 to have Gaussian distributions, with their SDs specified as 50% of their original values, except the  
667 temperature dependency  $Q_{10,ox}$  and  $\theta$  whose SDs were specified as 50% of their deviation to unity.  
668 More specifically, we tested the sensitivity within the ranges of mean $\pm$ SD at four points, i.e., +SD,  
669 +0.5SD, -0.5SD, and -SD.

670 To constrain uncertainties in European scale CH<sub>4</sub> emissions, we complemented the sensitivity  
671 analysis (n=36) with another 28 scenarios under several extreme cases and different combinations  
672 of variations in key parameters. With these 64 assessments taken as samples, we then used a machine  
673 learning approach to assess the uncertainty associated with our estimation of European lake CH<sub>4</sub>  
674 fluxes. Specifically, we trained a Random Forest (RF) model that capture nonlinear relationships  
675 between our key model parameters and European lake CH<sub>4</sub> emissions, i.e., the key parameters are  
676 taken as predictors and the European lake CH<sub>4</sub> emissions are taken as target variable. Next, we  
677 produced 1000 Gaussian-distributed random samples within the parameter space and estimated an  
678 ensemble of CH<sub>4</sub> emissions using the trained RF model.

### 679 3. Results

#### 680 3.1 Assessing the performance of FLaMe-v1.0 in capturing patterns of CH<sub>4</sub> dynamics across 681 different lake types

682 The FLaMe-v1.0 is shown to be able to well capture the typically observed, contrasting physical  
683 and biogeochemical behaviors for two representative cases (Fig. 5 and Fig. S9–17; more details in  
684 Supplementary Text S3): shallow vs. deep, eutrophic vs. oligotrophic and warm vs. cold lakes. In the  
685 deep oligotrophic lake, the mean temperature reveals a lower and narrower seasonal variability ( $\sim 3\text{--}8^\circ$   
686 C) compared to the shallow eutrophic lake ( $5\text{--}15^\circ\text{C}$ ) (Fig. 5a vs. 5b). Large temperature variations  
687 in the latter are mainly driven by the smaller water volume and thus faster mean temperature response  
688 to fluctuations in atmospheric temperature. In addition, the annual averaged  $F_{PP}$  in the shallow  
689 eutrophic lake ( $490\text{ gC m}^{-2}\text{ yr}^{-1}$ ) is approximately 38 times higher than that in the deep oligotrophic  
690 lake ( $13\text{ gC m}^{-2}\text{ yr}^{-1}$ ) (Fig. 5c vs. 5d). This difference can be explained by the differences in water  
691 volume (energy exchange), trophic status, and climate forcings. The higher  $F_{PP}$  of the shallow  
692 eutrophic lake also translates into higher  $C_{OC,auto}$  concentration ( $\sim 110$  times) which persist over longer  
693 periods (Fig. 5e vs. 5f), despite substantially higher  $F_{min}$  rates.

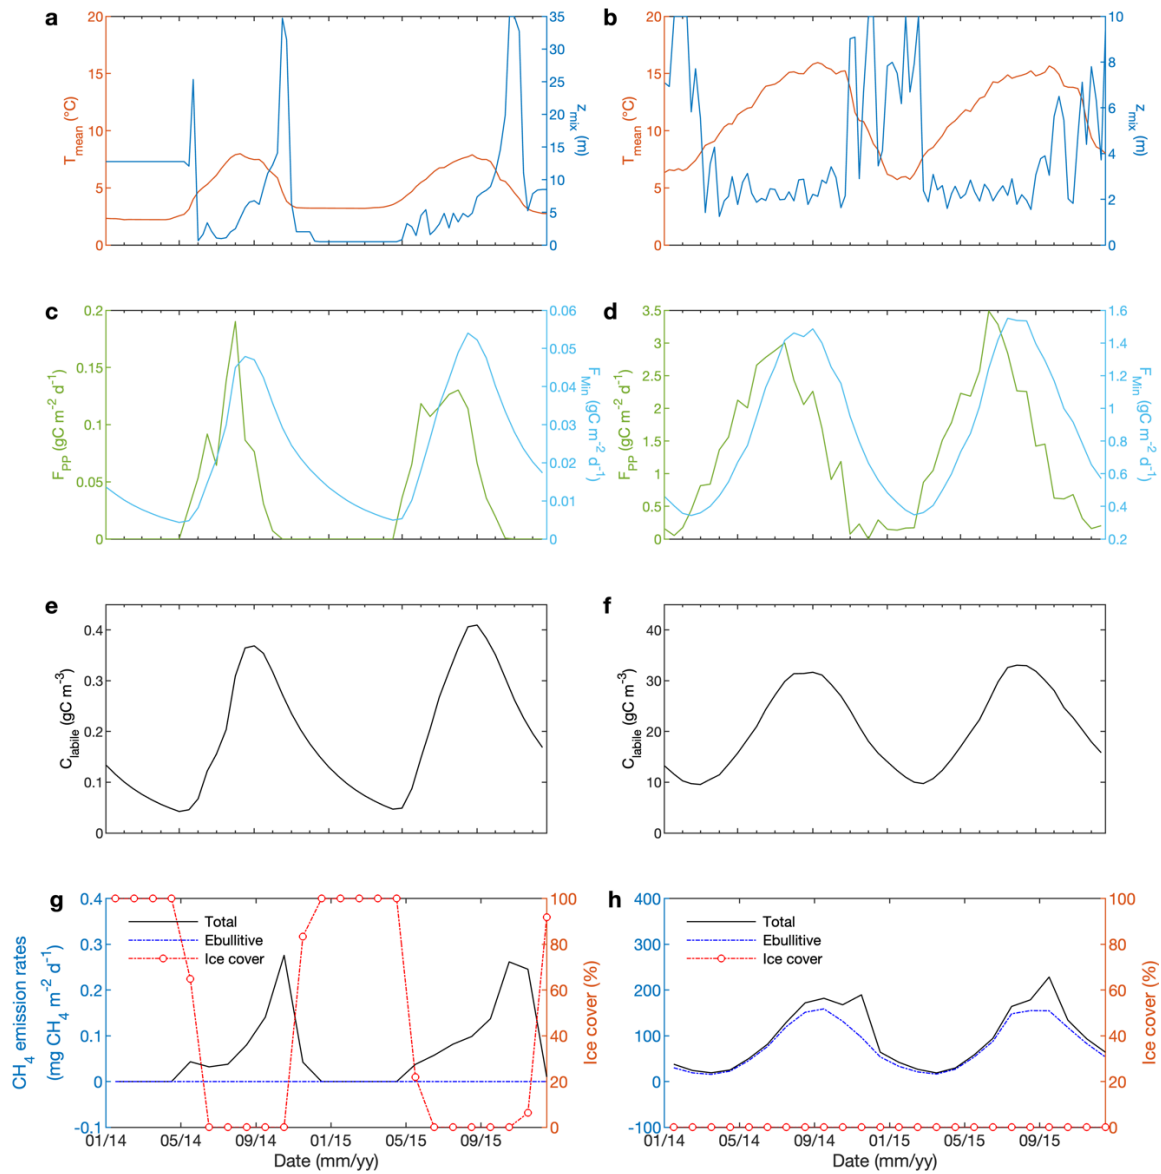

**Fig. 5. Depth-integrated temporal evolution of variables and processes in two theoretical representative lakes.**

The deep oligotrophic lake (left) has a maximal depth of 35 m and [TP] of  $3 \mu\text{gP L}^{-1}$ , and is driven by the climate forcings at the location of  $63.75^{\circ}\text{N}$ ,  $26.25^{\circ}\text{E}$ . The shallow eutrophic lake (right) has a maximal depth of 10 m and [TP] of  $80 \mu\text{gP L}^{-1}$ , and is driven by the climate forcings at the location  $43.75^{\circ}\text{N}$ ,  $-6.25^{\circ}\text{E}$ . (a) and (b) show the evolution of lake mean temperature and mixing depth; (c) and (d) show the evolution of primary production ( $F_{\text{PP}}$ ) and mineralization rate ( $F_{\text{Min}}$ ); (e) and (f) show the evolution of concentration of autochthonous organic carbon ( $C_{\text{OC,auto}}$ ); (g) and (h) show the evolution of  $\text{CH}_4$  emission rates and ice cover.

Note the difference scales between the left and right panels.



703 In the deep oligotrophic lake, the simulated vertical temperature profiles indicate an almost  
704 permanently maintained stratification that is only interrupted by short but intense turnover events  
705 during late falls (Fig. S9a). Lake stratification (e.g., lake turnover and O<sub>2</sub> concentrations that depend  
706 mostly on solubility and hence, temperature) dominates the spatio-temporal pattern of O<sub>2</sub> such that  
707 O<sub>2</sub> concentration is near-saturated during most of the year (Fig. S9c). The oligotrophic status, together  
708 with the well oxygenated conditions, results in extremely low CH<sub>4</sub> concentrations. Higher CH<sub>4</sub>  
709 concentrations are only simulated near the lake bottom following the productive season, i.e., late  
710 summer/fall transition (Fig. S9e). In contrast, in the shallow eutrophic lake, the weaker stratification  
711 results in a less pronounced vertical temperature gradient (Fig. S9b). The vertical lake O<sub>2</sub> profile is  
712 not only controlled by the lake physics (temperature and O<sub>2</sub> solubility) but also by intense  
713 biogeochemical processes (Fig. S9d). During summer, O<sub>2</sub> concentrations in the upper portion of the  
714 lake are slightly supersaturated due to photosynthetic activity, followed by a gradual decrease in O<sub>2</sub>  
715 concentration as mineralization rates exceed primary production rates. Due to the high primary  
716 production in the eutrophic lake, large amounts of OC are exported below the thermocline, where  
717 heterotrophic activity progressively depletes O<sub>2</sub>, leading to the development of anoxic conditions in  
718 the hypolimnion. The combination of high  $F_{Min}$  and low O<sub>2</sub> concentrations drive the accumulation of  
719 CH<sub>4</sub> in late summer at the bottom of the lake (Fig. S9f), with maximal CH<sub>4</sub> concentration (3.0 g CH<sub>4</sub>  
720 m<sup>-3</sup>) exceeding those simulated in the deep oligotrophic lake by a factor of 600 (Fig. S9e).

721 By aggregating CH<sub>4</sub> fluxes over time, we obtained distinct seasonal patterns of CH<sub>4</sub> production  
722 and emission for these two representative lakes (Fig. 5g and 5h; Fig. S10). In the cold, deep  
723 oligotrophic lake (Fig. 5g and Fig. S10a), winter to early spring ice cover (December–April) blocks  
724 CH<sub>4</sub> emissions such that lake CH<sub>4</sub> emissions are limited to the period between May and November.

725 CH<sub>4</sub> production is highest (0.8 mg CH<sub>4</sub> m<sup>-2</sup> d<sup>-1</sup>) in August and lowest (0.08 mg CH<sub>4</sub> m<sup>-2</sup> d<sup>-1</sup>) in April.  
726 Almost all the produced CH<sub>4</sub> escapes the sediment via diffusion as gas bubbles do not form due to  
727 low CH<sub>4</sub> production rates and high-water pressure. However, the benthic CH<sub>4</sub> flux is subsequently  
728 largely oxidized in the well oxygenated deep water column. As a result, total lake CH<sub>4</sub> emissions are  
729 low (0 to 0.24 mg CH<sub>4</sub> m<sup>-2</sup> d<sup>-1</sup>) with a slight peak in October. In the shallow eutrophic lake (Fig. 5h  
730 and Fig. S10b), the warmer climate prevents ice formation on the lake surface, leading to an emission  
731 season about twice as long as under colder climatic conditions. CH<sub>4</sub> production (20 to 350 mg CH<sub>4</sub>  
732 m<sup>-2</sup> d<sup>-1</sup>) is >1000 times higher than that in cold, deep oligotrophic lake due to the higher nutrient loads,  
733 lower O<sub>2</sub> levels, higher irradiance as well as higher temperature (Fig. 5b). Higher CH<sub>4</sub> production  
734 rates, together with lower water pressure, drive the formation of gas bubbles, leading to a higher  
735 fraction of CH<sub>4</sub> emissions via the ebullitive pathway. The weaker stratification and the shorter  
736 transport time scale in the shallow lake limits CH<sub>4</sub> oxidation during diffusive transport, leading to  
737 ~900 times higher total CH<sub>4</sub> emissions compared to the deep, oligotrophic lake. Total lake CH<sub>4</sub>  
738 emissions are highest (210 mg CH<sub>4</sub> m<sup>-2</sup> d<sup>-1</sup>) in September and lowest (20 mg CH<sub>4</sub> m<sup>-2</sup> d<sup>-1</sup>) in February.

739 By decomposing the collective responses of shallow and deep lakes into individual effects  
740 induced by trophic level, climate and lake depth using additional theoretical numerical simulations,  
741 we found that the trophic level exerts the most important control on CH<sub>4</sub> dynamics, followed by  
742 climate, and finally, lake depth (Fig. S11–S14). Specifically, the yearly mean CH<sub>4</sub> production is  
743 increased by a factor of 30 (from 3 to 89 mg CH<sub>4</sub> m<sup>-2</sup> d<sup>-1</sup>), and the yearly mean CH<sub>4</sub> emission is  
744 increased by a factor of 44 (from 1.3 to 57 mg CH<sub>4</sub> m<sup>-2</sup> d<sup>-1</sup>) from oligotrophic to eutrophic status (i.e.,  
745 [TDP] increased by 10 times) (Fig. S12). From cold to warm climate, the yearly mean CH<sub>4</sub> production  
746 and emission increase by a factor of 6 (9.4 to 59 mg CH<sub>4</sub> m<sup>-2</sup> d<sup>-1</sup>) (Fig. S13), and a factor of 5 (5.7 to

747 30 g CH<sub>4</sub> m<sup>-2</sup> d<sup>-1</sup>), respectively. By increasing lake depth from 15 m to 35 m (Fig. S14), the CH<sub>4</sub>  
748 production rates remain almost the same, i.e., 20 mg CH<sub>4</sub> m<sup>-2</sup> d<sup>-1</sup> for the yearly mean and 60 mg CH<sub>4</sub>  
749 m<sup>-2</sup> d<sup>-1</sup> for the peak, while the CH<sub>4</sub> emissions are overall lower (35 to 22 mg CH<sub>4</sub> m<sup>-2</sup> d<sup>-1</sup> for the peak  
750 without considering the storage flux) for the deeper lake.

### 751 **3.2 Evaluation of simulated temporal lake CH<sub>4</sub> emissions against observations from four well-** 752 **surveyed lakes**

753 In Klöntal and Erssjön Lakes (Table 2, Fig. 6a and 6b), FLaMe-v1.0 captures the observed  
754 seasonal cycles of CH<sub>4</sub> emissions well, albeit with almost a one-month delay. As a result, the  
755 simulated CH<sub>4</sub> fluxes are slightly lower in the first half of the year and slightly higher in the second  
756 half. This lag between observations and model results is likely due to the use of idealized climate  
757 forcings but could also be attributed to the unresolved changes in water levels and in-lake TDP  
758 dynamics. In the Klöntal Lake (Fig. 6a), the observed CH<sub>4</sub> fluxes are exceptionally high in April (1.64  
759 mg CH<sub>4</sub> m<sup>-2</sup> d<sup>-1</sup>) and July (5.03 mg CH<sub>4</sub> m<sup>-2</sup> d<sup>-1</sup>), interrupting the normal seasonal cycles. These abrupt  
760 observed emissions might reflect the contributions from storage fluxes that are not well captured by  
761 FLaMe-v1.0. Apart from these two months with exceptionally high fluxes, the observational data  
762 indicates peak emissions of 3.18 mg CH<sub>4</sub> m<sup>-2</sup> d<sup>-1</sup> in August and no emissions during the ice-covered  
763 period. FLaMe-v1.0 simulates similar fluxes, with a peak of 3.4 mg CH<sub>4</sub> m<sup>-2</sup> d<sup>-1</sup> in September (and  
764 3.17 mg CH<sub>4</sub> m<sup>-2</sup> d<sup>-1</sup> in August), and a null flux in January–February when the model predicts ice  
765 formation. In the Erssjön Lake (Fig. 6b), observational data report a peak in CH<sub>4</sub> emission reaching  
766 13.48 mg CH<sub>4</sub> m<sup>-2</sup> d<sup>-1</sup> in July and no emissions during the ice-covered period, whereas FLaMe-v1.0  
767 simulates a peak emission of 18.76 mg CH<sub>4</sub> m<sup>-2</sup> d<sup>-1</sup> in August (and 12.82 mg CH<sub>4</sub> m<sup>-2</sup> d<sup>-1</sup> in July), and  
768 no flux in February. Moreover, the simulated CH<sub>4</sub> fluxes are exceptionally high in April (11.10 mg

769  $\text{CH}_4 \text{ m}^{-2} \text{ d}^{-1}$ ) due to the release of a storage fluxes that does not seem to be recorded by the  
770 observations. These high  $\text{CH}_4$  fluxes attributed to storage and lake turnover are usually associated  
771 with large variability, i.e., in Klöntal Lake (Fig. 6a), the observed variability (standard deviation, SD)  
772 in  $\text{CH}_4$  flux in July is almost 8-fold larger than the simulated one, whereas in Erssjön Lake (Fig. 6b),  
773 the simulated SD in  $\text{CH}_4$  flux in April is almost 6-fold larger than that of the observed one. This  
774 suggests that both *in-situ* measurements and FLaMe-v1.0 struggle to accurately capture the storage  
775 fluxes. Apart from these storage fluxes, we found that the SDs of  $\text{CH}_4$  fluxes simulated by FLaMe-  
776 v1.0 are lower than those observed for most months, indicating a more stable behavior in the  
777 simulations compared to the observations across the multi-year period considered here.

778 For the Upper Mystic and Villasjön Lakes (Fig. 6c and 6d), the observed temporal patterns of  
779  $\text{CH}_4$  fluxes appear more erratic, either due to the dominant role of short-term water level fluctuations  
780 or due to the complex ice cover dynamics. For the Upper Mystic Lake (Fig. 6c), the observed  $\text{CH}_4$   
781 fluxes are irregular or fluctuating ( $0\text{--}17.6 \text{ mg CH}_4 \text{ m}^{-2} \text{ d}^{-1}$ ) over the year, a pattern which was  
782 explained by dynamic variations of lake water levels (Varadharajan, 2009). Since *in-situ* water level  
783 measurements are lacking and the lake area and depth are set as constant in the model, the simulated  
784 temporal variations cannot capture these observed erratic patterns well. Our model produces a  
785 smoother seasonal cycle of monthly-mean  $\text{CH}_4$  fluxes over the year, i.e., high fluxes ( $10.02\text{--}13.38$   
786  $\text{mg CH}_4 \text{ m}^{-2} \text{ d}^{-1}$ ) during the productive season (August–October), and low fluxes ( $0.02\text{--}7.56 \text{ mg CH}_4$   
787  $\text{m}^{-2} \text{ d}^{-1}$ ) during the other months. Moreover, the model predicts a weak storage flux occurring in  
788 November ( $10.20 \text{ mg CH}_4 \text{ m}^{-2} \text{ d}^{-1}$ ). For the Villasjön Lake (Fig. 6d), the observed  $\text{CH}_4$  fluxes are  
789 limited to the period of June–October, due to the long ice cover period induced by the cold climate.  
790 FLaMe-v1.0 captures the observed ice-cover period well and produces similar seasonal cycles of  $\text{CH}_4$

791 fluxes. The simulated means and SDs are very close to observations in June and July, but both, means  
792 and SDs, are much lower than observations in August, September, and October.

793 In summary, despite the use of idealized climatic forcing and neglecting variations in lake area  
794 and water level, FLaMe-v1.0 broadly captures the observed temporal patterns of monthly mean  
795 emissions, albeit sometimes with small delays or diverging extents of high emissions periods. The  
796 SDs of simulated CH<sub>4</sub> fluxes are also usually lower than the observed values, which is to be expected  
797 considering that our model is not designed to capture high-frequency fluctuations of CH<sub>4</sub> fluxes. The  
798 largest biases can be found in the estimations of storage fluxes (timing and magnitude), probably due  
799 to 1) the difficulty of capturing these fluxes with existing measurement instruments and techniques,  
800 2) the possibility of methane oxidation with greater than expected values during turnover and ice-out  
801 (Mayr *et al.*, 2020; Zimmermann *et al.*, 2019; Pajala *et al.*, 2022) and 3) the lack of *in-situ*  
802 measurements of climate conditions, dynamical water levels, and dynamic TDP concentrations  
803 (Denfeld *et al.*, 2018). Resolving these issues will require to assemble a much larger dataset of  
804 observed long time-series of CH<sub>4</sub> fluxes and associated physical and biogeochemical variables, such  
805 as those reported by Velasco *et al.* (2024) and Natchimuthu *et al.* (2016). To help further calibrate  
806 and evaluate the model, this much larger pool of observations should span a broader range of  
807 environmental conditions to be more representative of the lake CH<sub>4</sub> dynamics on the continental to  
808 global scales. Overall, given the scarce spatiotemporal observations and the limited possibility to  
809 validate current knowledge on process regulation in fields, it is difficult for all existing models to  
810 produce the details of the CH<sub>4</sub> dynamics in specific single lakes. Hence, the temporal patterns of CH<sub>4</sub>  
811 fluxes simulated by FLaMe-v1.0 are seen as acceptable, as its main focus is to capture the broad

spatio-temporal patterns of CH<sub>4</sub> emissions across the thousands of lakes that need to be accounted for in large-scale applications (see section 3.3).

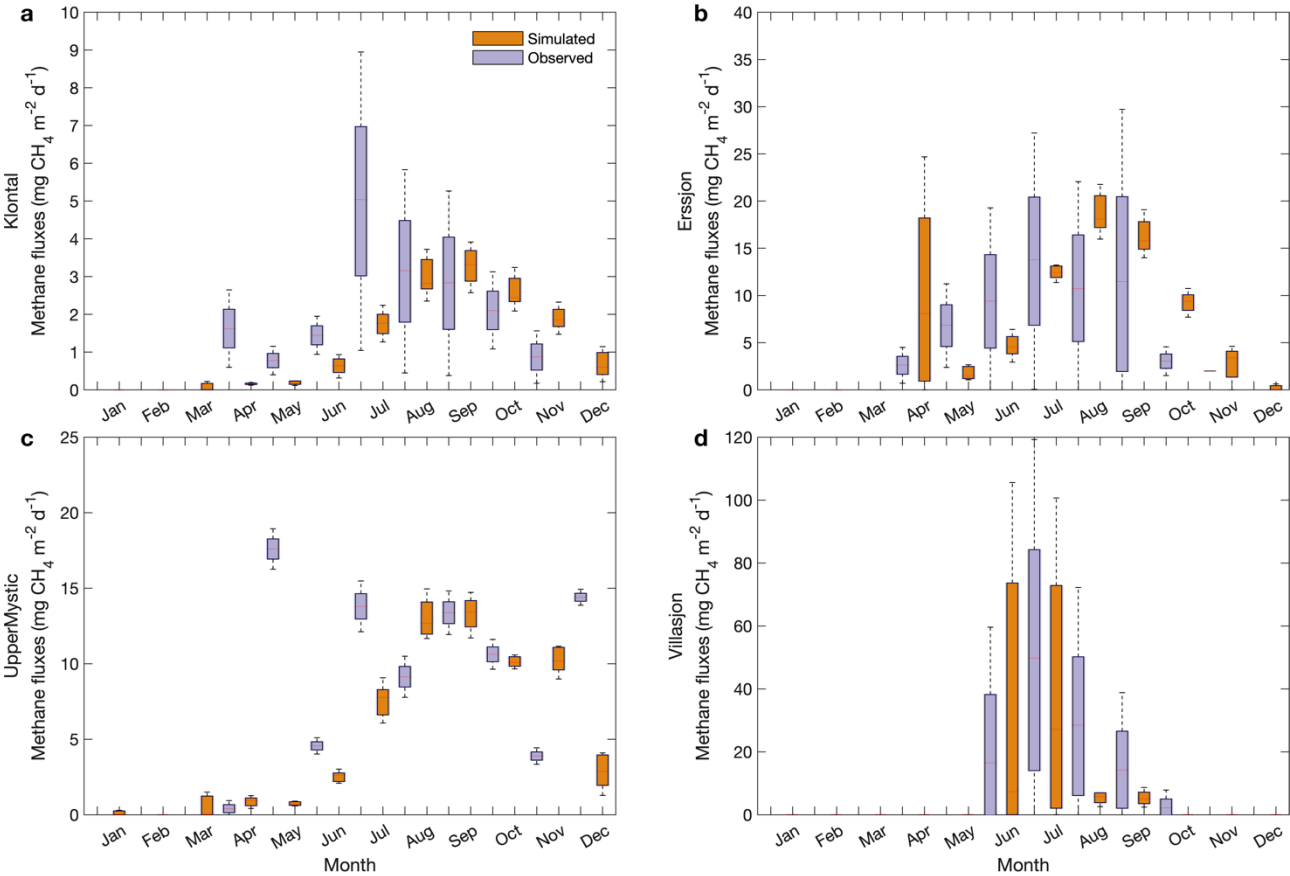

**Fig. 6. Evaluation of FLaMe-v1.0 against monthly mean CH<sub>4</sub> fluxes recorded in long time-series of observations in four real lakes. (a) Klöntal, (b) Erssjön, (c) Upper Mystic, and (d) Villasjön. The detailed lake characteristics are listed in Table 2. The climate forcings for these four lakes are extracted from GSWP3-W5E5 model from ISIMIP3a. Note the different scales of CH<sub>4</sub> emissions in each lake.**

### 820 3.3 FLaMe-v1.0 application on the European domain

#### 821 3.3.1 Evaluation of FLaMe-v1.0 in European lakes

822 In the European scale application of FLaMe-v1.0, we first evaluated the simulated  $F_{PP}$  against  
823 the empirical ranges reported by Wetzell (2001) for lakes under ultraoligotrophic (0–5  $\mu\text{gP L}^{-1}$ ),  
824 oligotrophic (5–10  $\mu\text{gP L}^{-1}$ ), mesotrophic (10–30  $\mu\text{gP L}^{-1}$ ), and eutrophic ( $>30 \mu\text{gP L}^{-1}$ ) conditions  
825 (Fig. 7 and Fig. S18). Figure 7 shows that, under different trophic status, the means and medians of  
826  $F_{PP}$  simulated by FLaMe-v1.0 (for 953 representative lakes) fall well within the reported ranges.  
827 Slight deviations could only be observed in ultraoligotrophic lake for which the model tends to  
828 slightly overestimate  $F_{PP}$  (Fig. 7a). Ultraoligotrophic and oligotrophic lakes reveal very similar mean  
829 and median of  $F_{PP}$  that fall at the higher ends of the ranges specified by Wetzell (2001) or even exceed  
830 it in the case of ultraoligotrophic lakes. In turn, mesotrophic and eutrophic lakes reveal mean and  
831 median  $F_{PP}$  that fall at the lower ends of the ranges specified by Wetzell (2001). This slight difference  
832 of simulated versus observed  $F_{PP}$  in lakes with different trophic conditions can be explained by the  
833 relatively low value of  $K_{s,P}$  (90  $\mu\text{g L}^{-1}$ ) compared to the concentration of [TP] (Fig. S7–S8), as well  
834 as the simplified representation of lake primary production in our model. When extending the  
835 representative lakes to all real lakes in the European domain ( $n=108407$ ), the median and mean of  
836 simulated  $F_{PP}$  are still within the specified ranges but are reduced slightly for all trophic status (Fig.  
837 S18), attributed to the positively skewed distribution of [TP] (Fig. S8), i.e., many lakes have a low  
838 [TP].

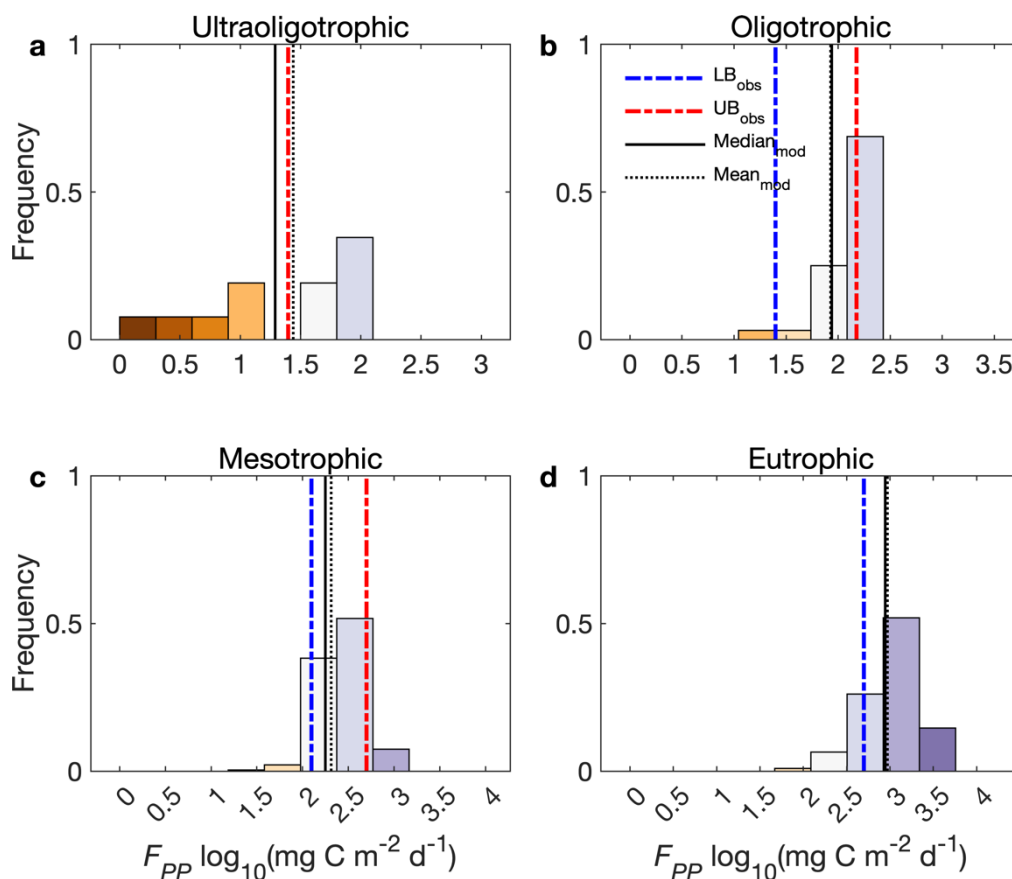

**Fig. 7. Comparison of simulated primary production ( $F_{PP}$ ) with empirical estimates reported by Wetzel (2001). The histograms show the frequency distributions of simulated  $F_{PP}$  (log scale) for 953 representative lakes that are grouped into ultraoligotrophic (0–5  $\mu\text{gP L}^{-1}$ ), oligotrophic (5–10  $\mu\text{gP L}^{-1}$ ), mesotrophic (10–30  $\mu\text{gP L}^{-1}$ ), and eutrophic (>30  $\mu\text{gP L}^{-1}$ ) lakes. In the figure, blue and red dashed lines are the lower and upper bounds ( $\text{LB}_{\text{obs}}$  and  $\text{UB}_{\text{obs}}$ ), respectively, of empirical ranges reported by Wetzel (2001) in this class of lakes; Black solid and dotted lines are the  $\text{Median}_{\text{mod}}$  and  $\text{Mean}_{\text{mod}}$ , respectively, of simulated  $F_{PP}$  for this class of lakes.**

Next, we evaluated the simulated diffusive and ebullitive  $\text{CH}_4$  emission rates against measurements in boreal and central European regions during late summer (August–September, 2010–2011) synthesized by Rinta *et al.* (2017) (Fig. 8 and Fig. S19). As Rinta *et al.* (2017) compiled *in-situ*



851 measurements of diffusive and ebullitive CH<sub>4</sub> emission rates from 17 boreal lakes (in southern  
852 Finland and Sweden) and 30 lakes of central European lakes (in The Netherlands, Germany and  
853 Switzerland), we extracted the mean CH<sub>4</sub> emission rates during August–September for representative  
854 lakes located in the grid cells corresponding to these two regions. Results indicate that the simulated  
855 diffusive CH<sub>4</sub> emissions for boreal European lakes (Fig. 8) agree well with the observations; yet the  
856 simulated ebullitive CH<sub>4</sub> emissions are slightly higher than the observations, leading to slightly higher  
857 total emissions. For central European lakes, the simulated diffusive CH<sub>4</sub> emissions are slightly lower  
858 than the observations, while the simulated ebullitive CH<sub>4</sub> emissions are slightly higher, leading to a  
859 good agreement in the total emissions (Fig. 8). The slightly higher ebullitive fluxes simulated by  
860 FLaMe-v1.0 may be attributed to not only the uncertain choice of model parameters (e.g.,  $\alpha$ ) but also  
861 to the systematically lower measured ebullitive fluxes in Rinta *et al.* (2017), where ebullition was  
862 separated from diffusion when the measured fluxes produced unreasonably high  $k_{600}$ . Moreover, Rinta  
863 *et al.* (2017) reported 6 and 27 times higher diffusive and ebullitive fluxes in central Europe,  
864 respectively, while our model simulates a smaller contrast of a 3- and 7-fold difference. This smaller  
865 contrast in the simulation can likely be explained by the higher variability in measurements, reflecting  
866 diverse climate, light and catchment properties in real lakes, while the variabilities in the simulated  
867 fluxes are significantly lower, probably due to more homogeneous representations of environmental  
868 conditions in the simulations. Specifically, the large differences in measured CH<sub>4</sub> emissions in boreal  
869 and central European lakes are attributed to their distinct characteristics, including climate (colder  
870 and dryer in the boreal region), light regime (larger absorbance in the boreal region) and catchment  
871 properties, in particular land-use (dominance of forests and smaller fraction of managed agricultural  
872 land in the boreal region). However, in FLaMe-v1.0, the catchment properties are not fully captured

873 by our sole, simplified indicator of [TP], such that the differences between boreal and central  
874 European lakes are underestimated. The coarse resolution of our model also likely reduces the  
875 represented range of climate conditions in our simulations compared to those experienced by the  
876 sampled lakes. In the meantime, observations are also associated with uncertainties, because  
877 measurements were not continuous in time and might thus not be fully representative of the late  
878 summer-early fall period, as well as sampling and measuring CH<sub>4</sub> emissions, in particular via the  
879 ebullitive pathway, is all but a trivial task. Nevertheless, the above evaluation of FLaMe-v1.0 against  
880 observations overall reveals the ability of our model to reproduce broadly observed patterns in  
881 primary production and CH<sub>4</sub> emissions observed across distinct trophic status and landscapes.

882

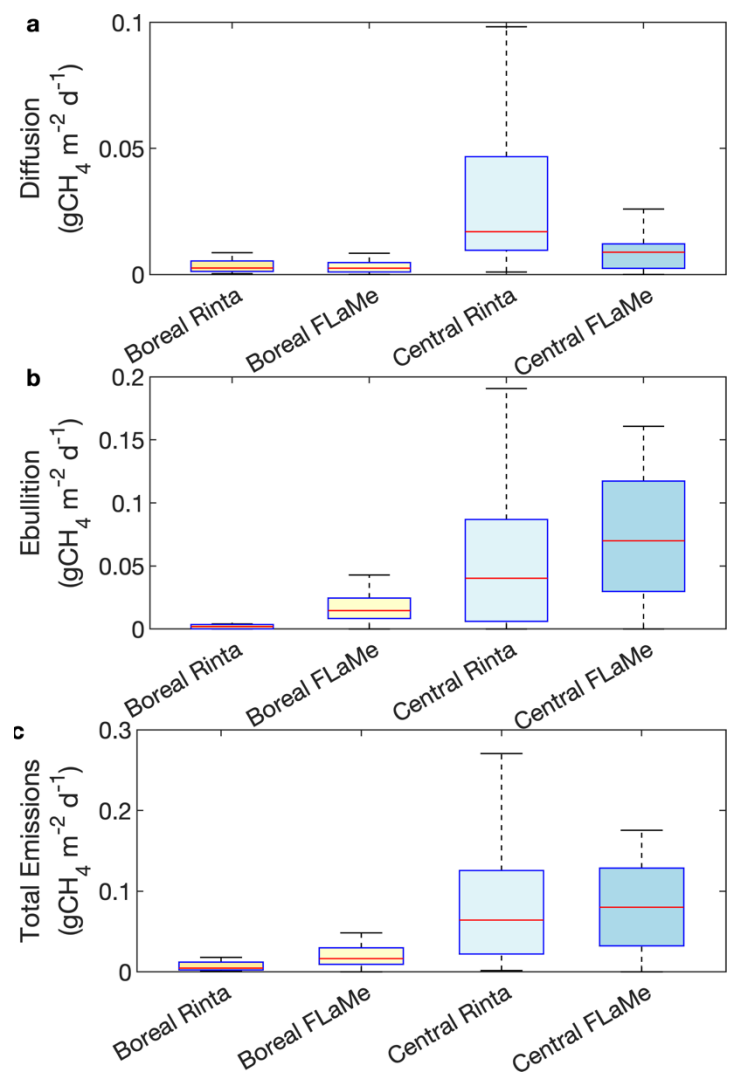

883

884

885

886

887

888

**Fig. 8. Comparison of simulated diffusive (top), ebullitive (middle) and total (bottom)  $\text{CH}_4$  emission rates with the measurements compiled by Rinta *et al.* (2017). The datasets reported by Rinta *et al.* (2017) comprises the diffusive, ebullitive and total emission rates from 17 boreal lakes in Finland and Sweden and 30 lakes of central European lakes in The Netherlands, Germany and Switzerland. The boxes represent the 25% and 75% quartiles, and the whiskers cover the 95% confidence intervals. The same figure with a log scale is presented in Fig. S19.**

### 889 3.3.2 European scale assessment of lake CH<sub>4</sub> emissions

890 The continental-scale assessment indicates that European lakes smaller than 1000 km<sup>2</sup> have an  
891 annual mean emission of 0.97 Tg CH<sub>4</sub> yr<sup>-1</sup> from autochthonous phytoplankton production during the  
892 period of 2010–2016, of which 30% and 70% are through diffusive and ebullitive transport pathways,  
893 respectively (Fig. 9 and Fig. S20). Note that, by including the estimated emissions from European  
894 lakes larger than 1000 km<sup>2</sup> with two different strategies (Supplementary Text S5), we provide a back  
895 of the envelope estimate for the mean total annual emission as 1.03–1.10 Tg CH<sub>4</sub> yr<sup>-1</sup>, which falls  
896 within the lower end of a previously reported range (0.9–2.5 Tg CH<sub>4</sub> yr<sup>-1</sup>) (Petrescu *et al.* 2023;  
897 Lauerwald *et al.*, 2023). The mean CH<sub>4</sub> emission rates per unit lake area amounts to 7.39 g CH<sub>4</sub> m<sup>-2</sup>  
898 yr<sup>-1</sup>, while the mean CH<sub>4</sub> emission rates per unit land surface area amounts to 0.054 g CH<sub>4</sub> m<sup>-2</sup> yr<sup>-1</sup>.  
899 Both emission rates decrease from South to North, despite the larger number of lakes and lake surface  
900 area in Northern Europe (Messenger *et al.*, 2016; Fig. S4). This south to north decrease can be  
901 explained by a much higher CH<sub>4</sub> emission rate in the South of Europe (reaching 109.6 g CH<sub>4</sub> m<sup>-2</sup> yr<sup>-1</sup>  
902 <sup>1</sup>) driven by much higher eutrophic status of southern lakes (together with higher temperatures), which  
903 outcompetes the effect of the larger lake area in the Scandinavian region and Finland (which  
904 contribute to ~30% of the European lake area). The ice-cover in northern lakes also contribute to the  
905 south-to-north gradient of CH<sub>4</sub> emission rates, which is tested to decrease the European lake  
906 emissions by 7%. This latitudinal pattern of CH<sub>4</sub> emissions per unit lake area is broadly consistent  
907 with that reported by Johnson *et al.* (2022) based on observations.

908 In terms of seasonal variability, our model results are in full agreement with the sparse data set  
909 of seasonally resolved observations (Tan *et al.*, 2015) and show that European lakes as a whole act  
910 as a continuous CH<sub>4</sub> source including during the winter months (individual lakes during ice-covered

911 periods will do not emit CH<sub>4</sub>). Moreover, the simulated CH<sub>4</sub> production and emission reveal a sharp  
912 10-fold increase from late Spring to late Summer that is largely driven by the increase in ambient  
913 temperature and  $F_{PP}$  rates. These findings underscore the importance of accounting for seasonal  
914 variations in CH<sub>4</sub> emissions when refining regional methane budgets (Tan *et al.*, 2015; Guo *et al.*,  
915 2020; Johnson *et al.*, 2022; Stavert *et al.*, 2022). A simple extrapolation of observed summer  
916 emissions to the yearly timescale would thus lead to an overestimation of yearly mean fluxes. In  
917 addition, model results also reveal a slight time-lag between the most favorable climate conditions  
918 (air temperature and light) and the maximum CH<sub>4</sub> production. This time lag in the model can be  
919 explained by the cascade of biogeochemical reactions (primary production, mineralization, O<sub>2</sub>  
920 depletion and onset of CH<sub>4</sub> production) that ultimately control benthic CH<sub>4</sub> fluxes, and the timescale  
921 of heat transfer from the lake surface to the deepest portion of our valley-shape lake bottom. This  
922 slight time-lag is further amplified by the time required for the benthic CH<sub>4</sub> to reach the water-air  
923 interface, although this effect is secondary due to the dominance of shallow lakes (with mean depth  
924 <7.8 m for 90% of lakes; Messenger *et al.*, 2016) within the European domain. Finally, the broad  
925 seasonal pattern in CH<sub>4</sub> emissions is complicated by the episodic releases of storage fluxes during  
926 lake turnovers which occur during spring (March and April; emissions>production) and fall (October  
927 and November; emission circa 85% of the production). Lake turnovers amplify total emissions for  
928 the duration of these short-lived events.

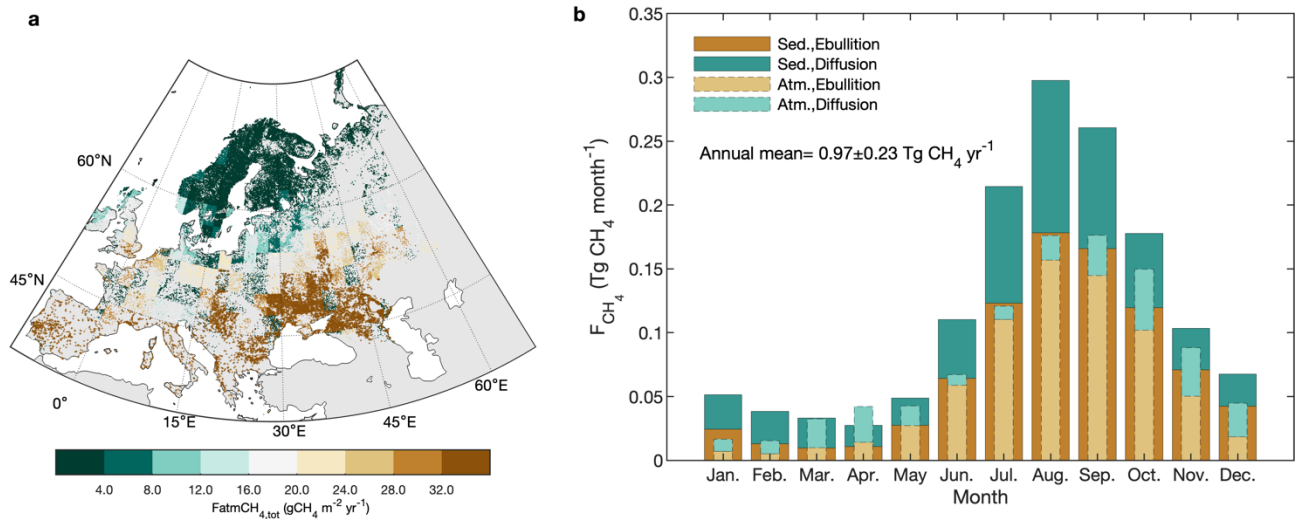

**Fig. 9. Methane (CH<sub>4</sub>) emissions from European lakes. (a) Spatial distribution of annual mean total CH<sub>4</sub> emissions (sum of diffusion and ebullition) for the period of 2010-2016, expressed in per unit of lake area. (b) Seasonality of total CH<sub>4</sub> production (wide bars with full lines) and emission (narrow bars with dashed lines) fluxes and their split between ebullitive and diffusive pathways (period 2010-2016).**

### 3.3.3 Sensitivity and uncertainty analysis

The sensitivity analysis of annual mean CH<sub>4</sub> emissions from European lakes to key model parameters (indicated by asterisks in Table 1) are summarized in Table 3. Table 3 indicates that the fraction of benthic organic matter mineralization channeled to methanogenesis ( $f_{mm}$ ) is the most sensitive parameter, and the increase (decrease) of  $f_{mm}$  by one SD leads to an increase (decrease) of European lake CH<sub>4</sub> emissions by 0.92 Tg CH<sub>4</sub> yr<sup>-1</sup> or 95% (0.67 Tg CH<sub>4</sub> yr<sup>-1</sup> or 69%). This is intuitive as a higher fraction of carbon channeled to methanogenesis will increase the continental scale CH<sub>4</sub> emissions, although the response is nonlinear. This is also supported by the findings of high potential methane production rates in various freshwater systems (including the lakes, reservoirs and rivers) (Bodmer *et al.*, 2025). The second and third most sensitive parameters are the maximum carbon fixation rate per unit of Chlorophyll-a ( $P_{chl,max}$ ) and the half saturation constant of phosphorus ( $K_{s,P}$ ).

945 An increase (decrease) of  $P_{chl,max}$  by one SD could increase (decrease) the European lake CH<sub>4</sub>  
 946 emissions by 0.77 Tg CH<sub>4</sub> yr<sup>-1</sup> or 79% (0.63 Tg CH<sub>4</sub> yr<sup>-1</sup> or 65%). This is again logical as a higher  
 947  $P_{chl,max}$  indicates a stronger capacity of phytoplankton to assimilate carbon, thus resulting in higher  
 948 amounts of organic carbon available for CH<sub>4</sub> production and emissions. The increase (decrease) of  
 949  $K_{s,P}$  by one SD decreases (increases) the European lake CH<sub>4</sub> emissions by 0.46 Tg CH<sub>4</sub> yr<sup>-1</sup> or 48%  
 950 (0.22 Tg CH<sub>4</sub> yr<sup>-1</sup> or 22%), a result which can be explained by a stronger TDP limitation of primary  
 951 production when  $K_{s,P}$  increases, resulting in lower CH<sub>4</sub> production and emissions. The next most  
 952 sensitive parameters are the mineralization and burial rates ( $k_{20}$  and  $k_{bur}$ ), for which an increase  
 953 (decrease) in  $k_{20}$  by one SD result in an increase (decrease) of European lake CH<sub>4</sub> emissions by 0.19  
 954 Tg CH<sub>4</sub> yr<sup>-1</sup> or 20% (0.39 Tg CH<sub>4</sub> yr<sup>-1</sup> or 40%), while an increase (decrease) of  $k_{bur}$  by one SD leads  
 955 to a decrease (increase) of European lake CH<sub>4</sub> emissions by 0.35 Tg CH<sub>4</sub> yr<sup>-1</sup> or 36% (0.21 Tg CH<sub>4</sub>  
 956 yr<sup>-1</sup> or 22%). This is straightforward to interpret as a higher mineralization rate ( $k_{20}$ ) will channel  
 957 more mineralization into methanogenesis (and also via lower O<sub>2</sub> levels in the lake), while a higher  
 958 burial rate ( $k_{bur}$ ) translates to a lower relative amount of organic matter degradation, and thus lower  
 959 CH<sub>4</sub> production and emissions.

960 The other parameters (including the shape parameter of the CH<sub>4</sub> production rate versus sediment  
 961 depth  $\alpha_{min}$ , the temperature dependence of mineralization  $\theta$ , as well as the maximum CH<sub>4</sub> oxidation  
 962 rate  $k_{max}$  and its temperature dependence  $Q_{10,ox}$ ) are less sensitive, with their relative effects on  
 963 European lake CH<sub>4</sub> emissions ranging from 1–20%. The shape parameter  $\alpha_{min}$  can affect the CH<sub>4</sub>  
 964 emissions as it determines the split between diffusive and ebullitive pathways, i.e., a higher  $\alpha_{min}$  favors  
 965 a higher fraction of CH<sub>4</sub> emitted to water and atmosphere through the diffusive pathway, a pathway  
 966 that is more prone to oxidation thus lowering total CH<sub>4</sub> emissions. We also find that a higher

967 temperature dependence of mineralization ( $\theta$ ) results in a lower CH<sub>4</sub> emission. This can be explained  
 968 by the reference temperature of 20°C in the expression of the  $\theta$  function, higher than the mean water  
 969 temperature in most lakes, leading to a faster drop in mineralization for a larger  $\theta$  when temperature  
 970 is lower than 20°C. The parameter  $k_{max}$  barely impacts the total CH<sub>4</sub> emissions, as this parameter  
 971 mostly influences the thickness of the water layers where the profiles of oxygen and methane overlap  
 972 and the oxidation occurs, while the volume-integrated rates remain essentially unaltered Thullner and  
 973 Regnier, 2019; Grossart *et al.*, 2011). As for the temperature dependence of oxidation ( $Q_{10,ox}$ ), the  
 974 sensitivity is even weaker because changing the  $Q_{10,ox}$  value has a lower impact on the oxidation rates  
 975 than changing  $k_{max}$ . Compared to other parameters (such as  $f_{mm}$  and  $P_{chl,max}$ ), the relatively low effects  
 976 of  $k_{max}$  and  $Q_{10,ox}$  does not mean that the methane oxidation is not important, but highlight the  
 977 dominant role of organic carbon production and decomposition on lake CH<sub>4</sub> emissions, which were  
 978 seldom simulated in previous models. Note that in our current model version, CH<sub>4</sub> oxidation only  
 979 occurs through the aerobic pathway and thus neglects the potential additional controls induced by  
 980 anaerobic pathways (Mostovaya *et al.*, 2022; Su *et al.*, 2020).

981 With the samples produced by the above sensitivity analysis and complemented by samples from  
 982 additional tests, we utilized a Random Forest (RF) model to assess the uncertainty of European lake  
 983 CH<sub>4</sub> emissions (see details in section 2.5.4). The RF model has a  $R^2$  of 0.73 and Root of Mean Square  
 984 Error (RMSE) of 0.24 Tg CH<sub>4</sub> yr<sup>-1</sup> for the train set (Fig. 10a) and a  $R^2$  of 0.52 and RMSE of 0.30 Tg  
 985 CH<sub>4</sub> yr<sup>-1</sup> for the out-of-bag samples (Fig. 10b), suggesting that it can capture the relationship between  
 986 model parameters and European lake CH<sub>4</sub> emissions well. Using these ensembles of CH<sub>4</sub> emissions,  
 987 the uncertainty (or SD) of European lake CH<sub>4</sub> emissions associated with the choice of biogeochemical  
 988 parameter values was estimated as 0.23 Tg CH<sub>4</sub> yr<sup>-1</sup>. Therefore, during the period of 2010-2016, the



989 European lakes (with surface areas between 0.1–1000 km<sup>2</sup>) have an annual mean emission of  
990 0.97±0.23 Tg CH<sub>4</sub> yr<sup>-1</sup>.

991 With the RF model, we can also identify the importance of key model parameters involved as  
992 predictors (Fig. 10c). We noticed that the first four leading parameters are also the most sensitive  
993 parameters as identified in Table 3, while the importance of other parameters are slightly different  
994 from the sensitivity analysis. This slight difference can be attributed to the interactions of model  
995 parameters that are overlooked in the sensitivity analysis. Overall, from the sensitivity and uncertainty  
996 analysis, we find that the European lake CH<sub>4</sub> emissions are strongly controlled by the carbon  
997 biogeochemical dynamics, which, however, was not fully accounted for in previous lake models.

998 **Table 3 Sensitivity of European lake CH<sub>4</sub> emissions (Tg CH<sub>4</sub> yr<sup>-1</sup>) to key model parameters.**  
 999 **Mean and SD are the mean and standard deviation of a particular parameter. Mean±SD**  
 1000 **indicates that the parameter values are adjusted by ± one SD; Mean±0.5SD indicates that**  
 1001 **the parameter values are adjusted by ±0.5 SD.**

| Parameter setting                 |                | Mean±SD          |      |                  |      | Mean±0.5SD       |      |                  |      |
|-----------------------------------|----------------|------------------|------|------------------|------|------------------|------|------------------|------|
|                                   |                | −SD              |      | +SD              |      | −0.5SD           |      | +0.5SD           |      |
|                                   |                | Absolute/percent |      | Absolute/percent |      | Absolute/percent |      | Absolute/percent |      |
| Primary production                | $P_{chl\_max}$ | 0.344            | -65% | 1.743            | +80% | 0.642            | -34% | 1.376            | +42% |
|                                   | $K_{s,P}$      | 1.432            | +48% | 0.754            | -22% | 1.170            | +21% | 0.852            | -12% |
| Mineralization and burial rates   | $k_{20}$       | 0.578            | -40% | 1.164            | +20% | 0.758            | -22% | 1.141            | +18% |
|                                   | $k_{bur}$      | 1.317            | +36% | 0.761            | -22% | 1.107            | +14% | 0.856            | -12% |
|                                   | $\theta$       | 1.028            | +6%  | 0.928            | -4%  | 0.989            | +2%  | 0.968            | 0%   |
|                                   | $f_{mm}$       | 0.302            | -69% | 1.888            | +95% | 0.605            | -38% | 1.437            | 48%  |
| Methane oxidation                 | $k_{max}$      | 1.057            | +9%  | 0.930            | -4%  | 1.009            | +4%  | 0.953            | -2%  |
|                                   | $Q_{10,ox}$    | 0.992            | +2%  | 0.983            | +1%  | 0.978            | +1%  | 0.973            | 0%   |
| Diffusion coefficient             | $k_{diff}$     | 1.124            | +16% | 1.046            | +8%  | 1.068            | +10% | 1.048            | +8%  |
| Base value of the shape parameter | $\alpha_{min}$ | 1.222            | +26% | 0.840            | -13% | 1.077            | +11% | 0.891            | -8%  |

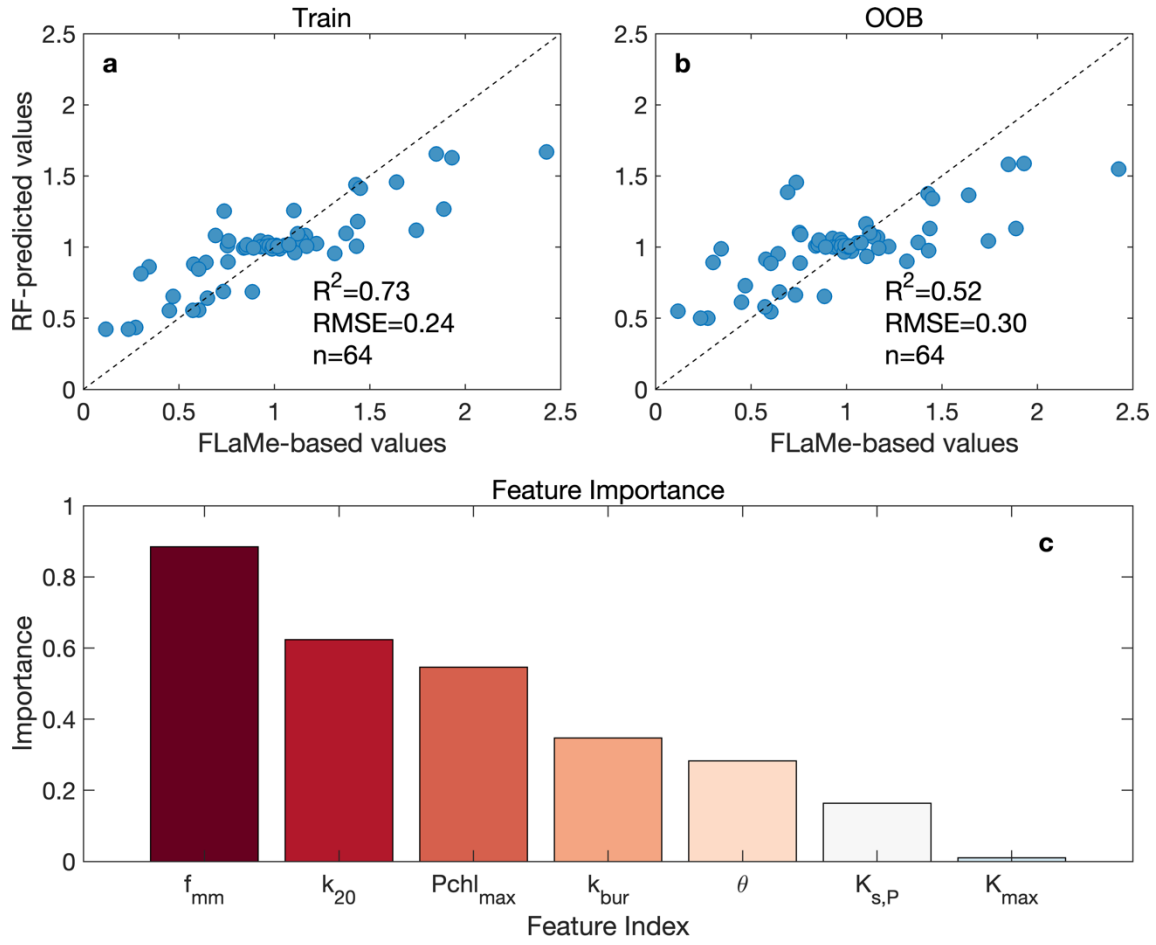

**Fig. 10. Random Forest (RF) model for the uncertainty analysis. (a) and (b) are the train and test (Out-of-Bag prediction) of the RF model. (c) shows the importance of key model parameters. Note that the parameters of  $\alpha_{min}$  and  $Q_{10,ox}$  are excluded from illustration due to their second order of importance (indicated by negative values).**

#### 4. Model limitations

We have illustrated that FLaMe-v1.0 is able to capture complex physical-biogeochemical behaviors for lakes with diverse settings and environmental controls. Specifically, the FLaMe-v1.0 has been evaluated against (i) observational temporal variations of  $CH_4$  fluxes at four contrasting, well-surveyed real lakes, (ii) the empirical ranges of primary production under different trophic status reported by Wetzel (2001), and (iii) observational patterns of  $CH_4$  emissions against trophic and

1013 climate gradients spanning the European domain (Rinta *et al.*, 2017). Moreover, the European scale  
1014 simulation produces a spatial pattern of lake CH<sub>4</sub> emission rates consistent with observation-based  
1015 upscaling approaches (Johnson *et al.*, 2022). This continental scale application also demonstrates the  
1016 power of our modelling framework that rests on a lake clustering approach and on a routing of nutrient  
1017 (TDP) inputs from surrounding catchments to lakes that allow to account for eutrophication effects.  
1018 Our results thus suggest that the FLaMe-v1.0 modelling framework performs well in providing  
1019 reliable spatio-temporal patterns of lake CH<sub>4</sub> emissions at the regional scale (with lake areas <1000  
1020 km<sup>2</sup>). However, the results also pinpoint to several key aspects to be improved in the model and  
1021 highlight critical data gaps that must be addressed in the future.

1022 First, the organic carbon module only accounts for autochthonous OC production as the substrate  
1023 for methanogenesis, but ignores the contribution of allochthonous OC inputs leached from the  
1024 catchments, rivers and streamflow. This is based on the distinct reactivity of autochthonous vs.  
1025 allochthonous OC inputs, with the latter being more refractory to mineralization and decomposition.  
1026 As a result, FLaMe-v1.0 may provide conservative estimates of CH<sub>4</sub> production and emission.  
1027 However, neglecting the allochthonous C inputs may at the same time minimize the feedback of OC  
1028 on light penetration, leading to systematically biased estimates of autochthonous production (section  
1029 2.2.2.1). Moreover, transient lake phosphorus dynamics and the co-limitations by nitrogen, albeit  
1030 assumed to be less important, are neglected and might increase the uncertainty in the estimates of  
1031 CH<sub>4</sub> production and emission. In addition, our primary production model does not resolve the short-  
1032 term (e.g., (sub)daily) dynamics of algae growth induced by climate variability, rendering model-data  
1033 comparison more difficult. In future model developments, these limitations could be addressed by (i)  
1034 integrating or routing the lake water, carbon and nutrient fluxes along the global river network, which

would allow to simultaneously solve the issue of time-invariant lake water levels in current global lake models (Golub *et al.*, 2022), including ours; (ii) refining the carbon module by incorporating more dynamic models for algal growth as well as P and N uptake and recycling processes within lakes.

Second, several model assumptions and implementations are based on empirical or theoretical knowledge, which may lead to biases in the estimation of CH<sub>4</sub> fluxes. For instance, the present version of FLaMe (i.e., v1.0) neglects the plant-mediated emission pathway (through aerenchyma in rooted plant) in the littoral zone (Mayr *et al.*, 2020; Zimmermann *et al.*, 2019) due to the lack of observational data for model calibration. Moreover, a recently reported process, i.e., the horizontal, advective littoral-pelagic transport of oxygen and methane (Doda *et al.*, 2024; Bouffard *et al.*, 2025) was ignored for the following reasons: (1) The current FLaMe-v1.0 relies on a 1-D vertical representation while explicitly accounting for horizontal transport would require a 2-D framework; and (2) observations related to horizontal transport remain limited, and whether this is an ubiquitous feature of the CH<sub>4</sub> dynamics across a wide range of lakes will require further observational evidences. Furthermore, in our model, the lake is assumed to follow a “valley” shape. Although this is an advancement from the “bucket” shape used in previous process-based lake models of CH<sub>4</sub> emissions (e.g., LAKE 2.0, ABLM, and bLake4Me), it remains a simplified assumption that captures important but not all features of a realistic lake geometry. Furthermore, several benthic CH<sub>4</sub> processes are highly parameterized. For instance, the split between aerobic and anaerobic decomposition of organic matter is represented by a single parameter  $f_{mm}$  and is determined based on the data compilation from Bastviken (2022). This simplification leads to the same temperature dependence of CH<sub>4</sub> processes occurring in the sediment as that of pelagic and benthic mineralization. This is a shortcoming although

1057 it should be noted that the overall temperature dependence of CH<sub>4</sub> emissions, which results from the  
1058 combined effects of OC production, mineralization, and subsequent CH<sub>4</sub> processes, was found to fall  
1059 well within the observed ranges reported by Aben *et al.* (2017) (Fig. S21). The split of diffusive and  
1060 ebullitive CH<sub>4</sub> fluxes is also currently captured by an empirically determined threshold depth ( $z_{eb,min}$ )  
1061 based on limited observations by Langenegger *et al.* (2019). Moreover, the effects of heat transfer  
1062 and CH<sub>4</sub> bubbles migration in the sediment are not resolved, which may lead to biased simulation of  
1063 CH<sub>4</sub> fluxes especially for the timing. These are simplified representations related to the highly  
1064 complex pathways of CH<sub>4</sub> production and emission, which needs to be improved by more mechanistic  
1065 representations of the biogeochemical processes controlling carbon cycling, CH<sub>4</sub> production and  
1066 transport via diffusion and bubble ascent. In addition, we acknowledge that the fixed grid spacing  
1067 currently limits the model application to very shallow lakes, which could be solved by adopting a  
1068 variable grid spacing scaling to the maximum lake depth.

1069 Third, different modules of the FLaMe-v1.0 could benefit from more comprehensive calibration  
1070 and evaluation but those are limited by data availability. Although FLaMe-v1.0 has been evaluated  
1071 against several timeseries of observed data collected in four well-surveyed lakes with contrasted  
1072 dynamics, a full evaluation in the context of large-scale application would benefit from a significantly  
1073 larger and representative set of observational data. Moreover, the *in-situ* climate conditions may vary  
1074 greatly from the grid-level forcings, and the lake water dynamics may also affect the CH<sub>4</sub> fluxes  
1075 significantly (e.g., Upper Mystic Lake; Varadharajan, 2009). Thus, a full comprehensive set of *in-*  
1076 *situ* measurements of climate, water level, physical and biogeochemical variables would be highly  
1077 valuable for the purpose of further model development, calibration and evaluation. At the European  
1078 scale, we partly circumvented these limitations by evaluating lake primary production against the

1079 broad ranges reported by Wetzel (2001), and the simulated diffusive and ebullitive CH<sub>4</sub> fluxes across  
1080 the environmental (nutrient and climate) gradients compiled by Rinta *et al.* (2017). In this context,  
1081 complementary time-series of vertically resolved organic carbon, CH<sub>4</sub> and O<sub>2</sub> concentrations, as well  
1082 as high frequency measurements of CH<sub>4</sub> fluxes capturing short-lived emissions via the storage and  
1083 ebullitive pathways and covering heterogeneity of CH<sub>4</sub> fluxes in large lakes (Denfeld *et al.*, 2018;  
1084 Mayr *et al.*, 2020; Zimmermann *et al.*, 2019) would help further calibrate and evaluate the FLaMe-  
1085 v1.0. These measurements should be performed using a sufficiently large set of representative lakes  
1086 covering the full range of lake morphologies, landscape properties, and climate.

## 1087 **5. Conclusion and outlook**

1088 In this study, we developed and tested a new process-based biogeochemical modeling framework  
1089 (FLaMe-v1.0) to simulate lake CH<sub>4</sub> fluxes on the large-scale and, as a “proof of concept”, applied the  
1090 model to European lakes. The physical lake model builds on the Canadian Small Lake Model (CSLM)  
1091 and is coupled to a set of novel biogeochemical modules describing lake organic matter, oxygen and  
1092 methane dynamics. We then showcased the abilities and performance of FLaMe-v1.0 by: (1)  
1093 analyzing the overall behaviors of the coupled C-O<sub>2</sub>-CH<sub>4</sub> dynamics in two representative cases (a  
1094 deep oligotrophic lake driven by cold climate in Northern Europe and a shallow eutrophic lake driven  
1095 by warm climate in Southern Europe) as well as their decomposition, and (2) evaluating simulated  
1096 temporal patterns of CH<sub>4</sub> fluxes against observations at four well-surveyed lakes with long-term  
1097 timeseries. Simulation results were consistent with our common knowledge of lake CH<sub>4</sub> dynamics,  
1098 suggesting that FLaMe-v1.0 can capture the patterns of CH<sub>4</sub> production and emissions across  
1099 different lake types as well as their responses to the changes in environment conditions, despite the  
1100 complexity of underlying biogeochemical processes. Furthermore, by applying the model to boreal

1101 and central European lakes, we showed that FLaMe-v1.0 captures well the observed magnitudes of  
1102 both diffusive and ebullitive CH<sub>4</sub> fluxes as well as the difference between boreal and central lakes.  
1103 Finally, at the European scale, FLaMe-v1.0 estimates total CH<sub>4</sub> emissions from lakes with areas of  
1104 0.1–1000 km<sup>2</sup> (n=108407, total area = 1.33x10<sup>5</sup> km<sup>2</sup>) as 0.97±0.23 Tg CH<sub>4</sub> yr<sup>-1</sup>. In addition, the model  
1105 resolves spatial patterns and seasonal variations of CH<sub>4</sub> emissions, providing a comprehensive view  
1106 of their contribution to regional methane budgets.

1107 Despite some limitations in its current model configuration, this first version of FLaMe is a  
1108 significant step forward in biogeochemical simulations of lake CH<sub>4</sub> dynamics. The model explicitly  
1109 incorporates the dynamics of depth-integrated organic carbon cycling, such that the responses of  
1110 organic carbon to climate and environmental change can be accounted for in estimating CH<sub>4</sub>  
1111 emissions. We also have incorporated the primary production as a function of total dissolved  
1112 phosphorus loads from the surrounding catchments, allowing us to evaluate for the first time the  
1113 impact of eutrophication on CH<sub>4</sub> emissions in a quantitative way. Moreover, our model is of  
1114 intermediate complexity, and is thus designed for large scale applications. Although the model was  
1115 run here at a coarse spatial resolution, its parallelized version offers the possibility to carry  
1116 simulations at a finer resolution in the future. With these advancements, our model can be used to  
1117 resolve the spatio-temporal variability of CH<sub>4</sub> emissions at regional and global scales under past and  
1118 future climates, and has the potential to be coupled to Earth System Models to investigate the  
1119 feedback between climate warming and global lake CH<sub>4</sub> emissions.



## 1120 **Data availability**

1121 The methane emission data for the four well-surveyed real lakes (Klöntal, Erssjön, Upper Mystic, and  
1122 Villasjön) were obtained from Tan *et al.* (2024). The *in-situ* measurements of diffusive and ebullitive  
1123 CH<sub>4</sub> emission rates in boreal and central European regions during late summer (August–September  
1124 2010–2011) were obtained from Rinta *et al.* (2017). The lake characteristic information within Europe  
1125 were obtained from the HydroLAKES database (Messenger *et al.* 2016):  
1126 <https://www.hydrosheds.org/products/hydrolakes>. The meteorological variables from GSWP3-  
1127 W5E5 reanalysis product were obtained from Inter-Sectoral Impact Model Intercomparison Project  
1128 (ISIMIP3a): <https://www.isimip.org/gettingstarted/input-data-bias-adjustment/>.

1129

## 1130 **Code availability**

1131 The source codes for FLaMe (Fluxes of Lake Methane) model version 1.0 are available at:  
1132 <https://github.com/myFeng818/FLaMe-model-v1.0.git>. The preprocessing and postprocessing codes  
1133 for the model can be obtained upon request.

1134

## 1135 **Acknowledgements**

1136 This study was supported by the Fonds National de la Recherche Scientifique of Belgium (F.R.S.–  
1137 FRNS PDR T.0191.23), by the project of CLIMATE-SPACE RECCAP2: Global Land Carbon  
1138 Budget and its Attribution to regional drivers, as well as by the project of ESM2025–Earth System  
1139 Models for the Future (101003536). We acknowledge the climate modelling groups involved in  
1140 ISIMIP3a for producing and making available their model outputs. Computational resources have

1141 been provided by the Consortium des Équipements de Calcul Intensif (CÉCI), funded by the Fonds  
1142 de la Recherche Scientifique de Belgique (F.R.S.-FNRS) under Grant No. 2.5020.11 and by the  
1143 Walloon Region.

1144

1145 **Author contributions**

1146 M.M., M.F. and P.R. designed the study as well as the overall model strategy. M.M. and M.F. co-  
1147 developed and tested the FLaMe model. D.B., S.A., R.L., A.J., G.G.L., M.D.M., and Z.T. provided  
1148 plenty of valuable suggestions related to the model development. D.B. and S.A. also provided  
1149 constructive suggestions on model evaluation against measurements and manuscript writing. M.D.M.  
1150 helped us in setting up the CSLM at the beginning of developing FLaMe, Z.T. provided us the  
1151 methane emission data from ISIMIP lake datasets, and W.T. helped us in collecting climate forcings  
1152 from ISIMIP3a. M.M. and M.F. wrote the first version of the manuscript, and all coauthors helped in  
1153 improving the manuscript.

1154

1155 **Competing interests**

1156 The authors declare no competing interests.

1157

1158 **Additional information**

1159 **Correspondence and requests for materials** should be addressed to M.F. (Maoyuan.feng@ulb.be)

1160

## 1161    **References**

- 1162    Aben, R.C.H., Barros, N., van Donk, E. *et al.*: Cross continental increase in methane ebullition under climate  
1163    change. *Nat. Commun.*, 8, 1682. <https://doi.org/10.1038/s41467-017-01535-y>, 2017.
- 1164    Arístegui, J., Agustí, S. and Duarte, C. M.: Respiration in the dark ocean, *Geophys. Res. Lett.*, 30, 1041,  
1165    <https://doi.org/10.1029/2002GL016227>, 2003.
- 1166    Bastviken D., Tranvik L. J., Downing, J. A., Crill, P. M., Enrich-Prast, A.: Freshwater methane emissions offset the  
1167    continental carbon sink, *Science*, 331(6013), 50. <https://doi.org/10.1126/science.1196808>, 2011.
- 1168    Bastviken, D. (2022). Methane. In T. Mehner & K. Tockner (Eds.), *Encyclopedia of Inland Waters (Second Edition)*  
1169    (pp. 136-154). Oxford: Elsevier.
- 1170    Bastviken, D., Cole, J., Pace, M., and Tranvik, L.: Methane emissions from lakes: Dependence of lake  
1171    characteristics, two regional assessments, and a global estimate, *Global Biogeochem. Cycles*, 18, GB4009,  
1172    <https://doi.org/10.1029/2004GB002238>, 2004.
- 1173    Behrenfeld, M. J. and Falkowski P. G.: Photosynthetic rates derived from satellite-based chlorophyll  
1174    concentration, *Limnol. Oceanogr.*, 42, <https://doi.org/10.4319/lo.1997.42.1.0001>, 1997.
- 1175    Bodmer, P., Bors, C., Liu, L. and Lorke, A.: Large sediment methane production potential in reservoirs compared  
1176    to lakes and rivers. *Limnol. Oceanogr.*, <https://doi.org/10.1002/lno.70063>, 2025.
- 1177    Bohrer, B. and Schultze, M.: Stratification of lakes, *Rev. Geophys.*, 46, 2006RG000210,  
1178    <https://doi.org/10.1029/2006RG000210>, 2008.
- 1179    Bouffard, D., Doda, T., Ramón, C. L., Ulloa, H. N.: Thermally driven cross-shore flows in stratified basins: a review  
1180    on the thermal siphon dynamics. *Flow*. 2025;5:E1. doi:10.1017/flo.2024.31
- 1181    Bouwman, A. F., Beusen, A. H. W., Billen G.: Human alteration of the global nitrogen and phosphorus soil  
1182    balances for the period 1970–2050, *Global Biogeochem. Cycles*, 23, GB0A04,  
1183    <https://doi.org/10.1029/2009GB003576>, 2009.
- 1184    Canadell, J. G., Monteiro, P. M. S., Costa, M. H., *et al.*: Global carbon and other biogeochemical cycles and  
1185    feedbacks, Climate Change 2021: The Physical Science Basis: Working Group I Contribution to the Sixth  
1186    Assessment Report of the Intergovernmental Panel on Climate Change, Cambridge University  
1187    Press, Cambridge, United Kingdom and New York, NY, USA, 673-816, 2021.
- 1188    Carlson, C. A., Ducklow, H. W., Michaels, A. F.: Annual flux of dissolved organic carbon from the euphotic zone  
1189    in the northwestern Sargasso Sea, *Nature*, 397, 405–408, 1994
- 1190    Cole, J. J., and Caraco, N. F.: Atmospheric exchange of carbon dioxide in a low-wind oligotrophic lake measured  
1191    by the addition of SF<sub>6</sub>, *Limnol. and Oceanogr.*, 4, <https://doi.org/10.4319/lo.1998.43.4.0647>, 1998.
- 1192    Deemer, B. R., Harrison, J. A., Li, S., *et al.*: Greenhouse Gas Emissions from Reservoir Water Surfaces: A New  
1193    Global Synthesis. *Bioscience*, 66(11), 949-964. <https://doi.org/10.1093/biosci/biw117>, 2016.

Deemer, B. R., & Holgerson, M. A.: Drivers of methane flux differ between lakes and reservoirs, complicating global upscaling efforts. *J. Geophys. Res.-Biogeo.*, 126, e2019JG005600, <https://doi.org/10.1029/2019JG005600>, 2021.

DelSontro, T., Beaulieu, J.J., and Downing, J.A.: Greenhouse gas emissions from lakes and impoundments: Upscaling in the face of global change, *Limnol. Oceanogr. Lett.*, 3, 64-75, <https://doi.org/10.1002/lol2.10073>, 2018

Delwiche, K. and Hemond, H.F.: An enhanced bubble size sensor for long-term ebullition studies. *Limnol. Oceanogr. Methods*, 15, 821-835. <https://doi.org/10.1002/lom3.10201>, 2017

Denfeld, B. A., Baulch, H. M., del Giorgio, P. A., Hampton, S. E., and Karlsson, J.: A synthesis of carbon dioxide and methane dynamics during the ice-covered period of northern lakes, *Limnol. Oceanogr. Lett.*, 3, 117-131. <https://doi.org/10.1002/lol2.10079>, 2018.

Dlugokencky, E. J., Steele, L. P., Lang, P. M., Masarie, K. A.: The growth rate and distribution of atmospheric methane, *J. Geophys. Res.*, 99, 17021–17043, <https://doi.org/10.1029/94JD01245>, 1994.

Doda, T., Ramón, C. L., Ulloa, H. N., Brennwald, M. S., Kipfer, R., Perga M.-E., Wüest, A., Schubert, C. J., Bouffard, D.: Lake surface cooling drives littoral-pelagic exchange of dissolved gases. *Sci. Adv.* **10**, eadi0617(2024). DOI: [10.1126/sciadv.adi0617](https://doi.org/10.1126/sciadv.adi0617)

Frieler, K., *et al.*: Scenario setup and forcing data for impact model evaluation and impact attribution within the third round of the Inter-Sectoral Impact Model Intercomparison Project (ISIMIP3a), *Geosci. Model Dev.*, 17, 1–51, <https://doi.org/10.5194/gmd-17-1-2024>, 2024.

Forster, P. M., *et al.*: Indicators of Global Climate Change 2023: annual update of key indicators of the state of the climate system and human influence, *Earth Syst. Sci. Data*, 16, 2625–2658, <https://doi.org/10.5194/essd-16-2625-2024>, 2024.

Garnaud, C., MacKay, M., & Fortin, V.: A one-dimensional lake model in ECCC's land surface prediction system. *J. Adv. Model. Earth Syst.*, 14, e2021MS002861. <https://doi.org/10.1029/2021MS002861>, 2022.

Gatley, D. P., Herrmann, S., & Kretzschmar, H. J.: A twenty-first century molar mass for dry air, *HVAC&R Research*, 14(5), 655–662. <https://doi.org/10.1080/10789669.2008.10391032>, 2008.

Golub, M., *et al.*: A framework for ensemble modelling of climate change impacts on lakes worldwide: the ISIMIP Lake Sector, *Geosci. Model Dev.*, 15, 4597–4623, <https://doi.org/10.5194/gmd-15-4597-2022>, 2022.

Grasset, C., Mendonça, R., Villamor Saucedo, G., Bastviken, D., Roland, F. and Sobek, S.: Large but variable methane production in anoxic freshwater sediment upon addition of allochthonous and autochthonous organic matter. *Limnol. Oceanogr.*, 63: 1488-1501. <https://doi.org/10.1002/lno.10786>, 2018.

1225 Grossart, H., Frindte, K., Dziallas, C., Eckert, W., Tang, K.W.: Microbial methane production in oxygenated water  
 1226 column of an oligotrophic lake, *Proc. Natl. Acad. Sci. U.S.A.* 108 (49) 19657-19661,  
 1227 <https://doi.org/10.1073/pnas.1110716108>, 2011.

1228 Guillemette, F., von Wachenfeldt, E., Kothawala, D. N., Bastviken, D., Tranvik, L. J.: Preferential sequestration of  
 1229 terrestrial organic matter in boreal lake sediments, *J. Geophys. Res. Biogeosci.*, 122, 863–874,  
 1230 <https://doi.org/10.1002/2016JG003735>, 2017.

1231 Hanson, P. C., Hamilton, D. P., Stanley, E. H., Preston, N., Langman, O. C., Kara, E. L.: Fate of Allochthonous  
 1232 Dissolved Organic Carbon in Lakes: A Quantitative Approach. *PLoS One*, 6(7): e21884,  
 1233 <https://doi.org/10.1371/journal.pone.0021884>, 2011.

1234 Hanson, P. C., Buffam, I., Rusak, J. A., Stanley, E. H., Watras, C.: Quantifying lake allochthonous organic carbon  
 1235 budgets using a simple equilibrium model, *Limnol. Oceanogr.*, 59, <https://doi.org/10.4319/lo.2014.59.1.0167>,  
 1236 2014

1237 Harrison, J. A., Prairie, Y. T., Mercier-Blais, S., Soued, C.: Year-2020 global distribution and pathways of reservoir  
 1238 methane and carbon dioxide emissions according to the greenhouse gas from reservoirs (G-res) model, *Global*  
 1239 *Biogeochem. Cycles*, 35, e2020GB006888. <https://doi.org/10.1029/2020GB006888>, 2021.

1240 Holgerson, M., and Raymond, P.: Large contribution to inland water CO<sub>2</sub> and CH<sub>4</sub> emissions from very small  
 1241 ponds. *Nature Geosci.*, 9, 222–226. <https://doi.org/10.1038/ngeo2654>, 2016.

1242 Imberger, J.: The diurnal mixed layer, *Limnol. Oceanogr.*, 30, 737–770, <https://doi.org/10.4319/lo.1985.30.4.0737>,  
 1243 1985.

1244 Imboden, D.M., and Wüest, A.: Mixing Mechanisms in Lakes. In: Lerman, A., Imboden, D.M., Gat, J.R. (eds)  
 1245 Physics and Chemistry of Lakes. Springer, Berlin, Heidelberg. [https://doi.org/10.1007/978-3-642-85132-2\\_4](https://doi.org/10.1007/978-3-642-85132-2_4),  
 1246 1995.

1247 Lan, X., Thoning, K.W., and Dlugokencky, E.J.: Trends in globally-averaged CH<sub>4</sub>, N<sub>2</sub>O, and SF<sub>6</sub> determined from  
 1248 NOAA Global Monitoring Laboratory measurements. <https://doi.org/10.15138/P8XG-AA10>, 2024

1249 Langenegger, T., Vachon, D., Donis, D., McGinnis, D.F.: What the bubble knows: Lake methane dynamics revealed  
 1250 by sediment gas bubble composition. *Limnol. Oceanogr.*, 64: 1526-1544. <https://doi.org/10.1002/lno.11133>,  
 1251 2019.

1252 Lauerwald, R., Regnier, P., Figueiredo, V., Enrich-Prast, A., Bastviken, D., Lehner, B.: Natural lakes are a minor  
 1253 global source of N<sub>2</sub>O to the atmosphere. *Global Biogeochem. Cycles*, 33, 1564–  
 1254 1581. <https://doi.org/10.1029/2019GB006261>, 2019.

1255 Lauerwald, R., Allen, G. H., Deemer, B. R., Liu, S., Maavara, T., Raymond, P., *et al.*: Inland water greenhouse gas  
 1256 budgets for RECCAP2: 2. Regionalization and homogenization of estimates. *Global Biogeochemical Cycles*,  
 1257 37, e2022GB007658, <https://doi.org/10.1029/2022GB007658>, 2023.

- 1258 Lewis, W. M.: Global primary production of lakes: 19<sup>th</sup> Baldi Memorial Lecture, *Inland Waters*, 1(1), 1–28.  
1259 [https://doi.org/10.5268/IW-1.1.384\\_2011](https://doi.org/10.5268/IW-1.1.384_2011).
- 1260 Liikanen, A., Murtoniemi, T., Tanskanen, H., Väisänen, T., *Martikainen, P. J.*: Effects of temperature and oxygen  
1261 availability on greenhouse gas and nutrient dynamics in sediment of a eutrophic mid-boreal  
1262 lake, *Biogeochemistry*, 59, 269–286. [https://doi.org/10.1023/A:1016015526712\\_2002](https://doi.org/10.1023/A:1016015526712_2002)
- 1263 Maavara, T., Lauerwald, R., Regnier, P., Van Cappellen, P.: Global perturbation of organic carbon cycling by river  
1264 damming, *Nat. Commun.* **8**, 15347. [https://doi.org/10.1038/ncomms15347\\_2017](https://doi.org/10.1038/ncomms15347_2017).
- 1265 Maavara, T., Lauerwald, R., Laruelle, G. G., Akbarzadeh, Z., Bouskill, N. J., Van Cappellen, P., Regnier,  
1266 P. Nitrous oxide emissions from inland waters: Are IPCC estimates too high? *Glob Change Biol.*, 25, 473–  
1267 448. [https://doi.org/10.1111/gcb.14504\\_2019](https://doi.org/10.1111/gcb.14504_2019).
- 1268 MacIntyre, S., Bastviken, D., Arneborg, L., Crowe, A. T., Karlsson, J., Andersson, A., Gålfalk, M., Rutgersson, A.,  
1269 Podgrajsek, E., Melack, J. M.: Turbulence in a small boreal lake: Consequences for air-water gas exchange,  
1270 *Limnol. Oceanogr.*, 66(3):827-854. <https://doi.org/10.1002/lno.11645>, 2020.
- 1271 MacKay, M. D., Versegny, D. L., Fortin, V., and Rennie, M. D.: Wintertime simulations of a boreal lake with the  
1272 Canadian Small Lake Model, *J. Hydrometeorol.*, 18, 2143–2160, <https://doi.org/10.1175/JHM-D-16-0268.1>,  
1273 2017.
- 1274 MacKay, M. D.: A process-oriented small lake scheme for coupled climate modeling applications, *J.*  
1275 *Hydrometeorol.*, 13, 1911–1924, <https://doi.org/10.1175/JHM-D-11-0116.1>, 2012.
- 1276 McGinnis, D. F., Greinert, J., Artemov, Y., Beaubien, S. E., Wüest, A.: Fate of rising methane bubbles in stratified  
1277 waters: How much methane reaches the atmosphere? *J. Geophys. Res.*, 111, C09007,  
1278 <https://doi.org/10.1029/2005JC003183>, 2006
- 1279 Mendonça, R., Müller, R.A., Clow, D., Verpoorter, C., Raymond, P., Tranvik, L. J., Sobek, S.: Organic carbon  
1280 burial in global lakes and reservoirs, *Nat. Commun.*, 8, 1694, <https://doi.org/10.1038/s41467-017-01789-6>,  
1281 2017
- 1282 Messenger, M., Lehner, B., Grill, G., Nedeva, I., Schmitt, O.: Estimating the volume and age of water stored in global  
1283 lakes using a geo-statistical approach. *Nat. Commun.*, 7, 13603, [https://doi.org/10.1038/ncomms13603\\_2016](https://doi.org/10.1038/ncomms13603_2016).
- 1284 Martin, J. H., Knauer, G. A., Karl, D. M., Broenkow, W. W.: VERTEX: carbon cycling in the northeast Pacific,  
1285 *Deep. Sea. Res. A.*, 34, 2, 267-285, [https://doi.org/10.1016/0198-0149\(87\)90086-0](https://doi.org/10.1016/0198-0149(87)90086-0), 1987.
- 1286 Mayorga, E., Seitzinger, S. P., Harrison, J. A., Dumont, E. Beusen, A. H. W., Bouwman, A. F., Fekete, B. M.,  
1287 Kroeze, C., Van Drecht, G.: Global Nutrient Export from WaterSheds 2 (NEWS 2): Model development and  
1288 implementation, *Environ. Model. Softw.*, 25, 7, 837-853, <https://doi.org/10.1016/j.envsoft.2010.01.007>, 2010.
- 1289 Mayr, M. J., Zimmermann, M., Dey, J., *et al.*: Growth and rapid succession of methanotrophs effectively limit  
1290 methane release during lake overturn. *Commun. Biol.*, 3, 108. <https://doi.org/10.1038/s42003-020-0838-z>,

2020.

Mostovaya, A., Wind-Hansen, M., Rousteau, P., Bristow, L.A. and Thamdrup, B.: Sulfate- and iron-dependent anaerobic methane oxidation occurring side-by-side in freshwater lake sediment. *Limnol Oceanogr*, 67, 231-246. <https://doi.org/10.1002/lno.11988>, 2022

Jackson, R., Saunois, M., Bousquet, P., Canadell, J. G., Poulter, B., Stavert, A. R., Bergamaschi, P., Niwa, Y., Segers, A., Tsuruta, A.: Increasing anthropogenic methane emissions arise equally from agricultural and fossil fuel sources, *Environ. Res. Lett.*, 15, 071002, <https://doi.org/10.1088/1748-9326/ab9ed2>, 2020.

Johnson, M. S., Matthews, E., Du, J., Genovese, V., Bastviken, D.: Methane emission from global lakes: New spatiotemporal data and observation-driven modeling of methane dynamics indicates lower emissions, *J. Geophys. Res.-Biogeo.*, 127, e2022JG006793. <https://doi.org/10.1029/2022JG006793>, 2022.

Pajala, G., Sawakuchi, H. O., Rudberg, D., *et al.*: The effects of water column dissolved oxygen concentrations on lake methane emissions—Results from a whole-lake oxygenation experiment. *J. Geophys. Res.: Biogeo.*, 128(11), e2022JG007185. doi:10.1029/2022jg007185, 2023.

Petrescu, A. M. R., Qiu, C., Ciais, P., *et al.*: The consolidated European synthesis of CH<sub>4</sub> and N<sub>2</sub>O emissions for the European Union and United Kingdom: 1990–2017, *Earth Syst. Sci. Data*, 13, 2307–2362, <https://doi.org/10.5194/essd-13-2307-2021>, 2021.

Petrescu, A. M. R., Qiu, C., McGrath, M. J., *et al.*: The consolidated European synthesis of CH<sub>4</sub> and N<sub>2</sub>O emissions for the European Union and United Kingdom, 1990–2019, *Earth Syst. Sci. Data*, 15, 1197–1268, <https://doi.org/10.5194/essd-15-1197-2023>, 2023.

Rinta, P., Bastviken, D. Schilder, J., van Hardenbroek, M., Stötter, T., Heiri, O.: Higher Late Summer Methane Emission from Central Than Northern European Lakes, *J. Limnol.*, 76 (1), <https://doi.org/10.4081/jlimnol.2016.1475>, 2017.

Regnier, P., Dale, A.W., Arndt, S., LaRowe, D.E., Mogollón, J., Van Cappellen, P.: Quantitative analysis of anaerobic oxidation of methane (AOM) in marine sediments: A modeling perspective, *Earth-Sci. Rev.*, 106, 1–2, 105-130, <https://doi.org/10.1016/j.earscirev.2011.01.002>, 2011.

Reynolds, C. S.: The ecology of phytoplankton, Cambridge University Press, 2006

Rosentreter, J. A., Borges, A. V., Deemer, B. R., *et al.*: Half of global methane emissions come from highly variable aquatic ecosystem sources, *Nat. Geosci.*, 14(4), 225-230, <https://doi.org/10.1038/s41561-021-00715-2>, 2021.

Ruardij, P. & Van Raaphorst, W.: Benthic nutrient regeneration in the ERSEM ecosystem model of the North Sea, *Neth. J. Sea Res.*, 33, 3–4, 453-483, [https://doi.org/10.1016/0077-7579\(95\)90057-8](https://doi.org/10.1016/0077-7579(95)90057-8), 1995.

Saunois, M., Bousquet, P., Poulter, B., *et al.*: The global methane budget 2000–2012, *Earth Syst. Sci. Data*, 8, 697–751, <https://doi.org/10.5194/essd-8-697-2016>, 2016.

- 1324 Saunois, M., Stavert, A. R., Poulter, B., *et al.*: The Global Methane Budget 2000–2017, *Earth Syst. Sci. Data*, 12,  
1325 1561–1623, <https://doi.org/10.5194/essd-12-1561-2020>, 2020.
- 1326 Saunois, M., Martinez, A., Poulter, B., *et al.*, Global Methane Budget 2000–2020, *Earth Syst. Sci. Data Discuss.*,  
1327 <https://doi.org/10.5194/essd-2024-115>, in review, 2024.
- 1328 Stavert, A. R., Saunois, M., Canadell, J. G., *et al.*: Regional trends and drivers of the global methane  
1329 budget, *Glob. Change Biol.*, 28, 182–200. <https://doi.org/10.1111/gcb.15901>, 2021.
- 1330 Stepanenko, V., Mammarella, I., Ojala, A., Miettinen, H., Lykosov, V., and Vesala, T.: LAKE 2.0: a model for  
1331 temperature, methane, carbon dioxide and oxygen dynamics in lakes, *Geosci. Model Dev.*, 9, 1977–2006,  
1332 <https://doi.org/10.5194/gmd-9-1977-2016>, 2016.
- 1333 Su, G., Zopfi, J., Yao, H., Steinle, L., Niemann, H. and Lehmann, M.F.: Manganese/iron-supported sulfate-  
1334 dependent anaerobic oxidation of methane by archaea in lake sediments. *Limnol. Oceanogr.*, 65, 863–875.  
1335 <https://doi.org/10.1002/lno.11354>, 2020.
- 1336 Tan, Z., Zhuang, Q., and Anthony, K. W.: Modeling methane emissions from arctic lakes: Model development and  
1337 site-level study, *J. Adv. Model. Earth Syst.*, 7, 459–483, <https://doi.org/10.1002/2014MS000344>, 2015.
- 1338 Tan, Z., Yao, H., Melack, J., Grossart, H.-P., Jansen, J., Balathandayuthabani, S., *et al.* A lake biogeochemistry  
1339 model for global methane emissions: Model development, site-level validation, and global applicability. *J. Adv.*  
1340 *Model. Earth Syst.*, 16, e2024MS004275. <https://doi.org/10.1029/2024MS004275>, 2024.
- 1341 Thottathil, S. D., Reis, P. C. J., Prairie, Y. T.: Methane oxidation kinetics in northern freshwater  
1342 lakes. *Biogeochemistry*, 143(1), 105–116. <https://www.jstor.org/stable/48701400>, 2019.
- 1343 Thullner, M., Regnier, P.: Microbial controls on the biogeochemical dynamics in the subsurface. *Rev. Mineral.*  
1344 *Geochem.*, 85 (1): 265–302. <https://doi.org/10.2138/rmg.2019.85.9>, 2019.
- 1345 Van Drecht, G., Bouwman, A. F., Harrison, J., Knoop, J. M.: Global nitrogen and phosphate in urban wastewater  
1346 for the period 1970 to 2050, *Global Biogeochem. Cycles*, 23, GB0A03,  
1347 <https://doi.org/10.1029/2009GB003458>, 2009.
- 1348 Varadharajan, C.: Magnitude and spatio-temporal variability of methane emissions from a eutrophic freshwater lake,  
1349 Thesis (Ph. D.)--Massachusetts Institute of Technology, Dept. of Civil and Environmental Engineering, 2009.
- 1350 Versegny, D. L., and MacKay, M. D.: Offline Implementation and Evaluation of the Canadian Small Lake Model  
1351 with the Canadian Land Surface Scheme over Western Canada. *J. Hydrometeor.*, 18, 1563–  
1352 1582, <https://doi.org/10.1175/JHM-D-16-0272.1>, 2017.
- 1353 Wanninkhof, R., Relationship between wind speed and gas exchange over the ocean revisited, *Limnol. Oceanogr.*  
1354 *Methods*, 12, doi:10.4319/lom.2014.12.351, 2014.
- 1355 Wanninkhof, R., Asher, W. E., Ho, D. T., Sweeney, C., McGillis, W. R.: Advances in quantifying air-sea gas  
1356 exchange and environmental forcing, *Ann. Rev. Mar. Sci.*, 1, 213–44, <https://doi.org/>



- 1357 10.1146/annurev.marine.010908.163742, 2009.
- 1358 Wetzel, R.G.: Limnology: Lake and River Ecosystems. Third Edition, Academic Press, San Diego, p389, 2001.
- 1359 William, R., Georgiy, K., Matti, L.: Basin-scale circulation and heat fluxes in ice-covered lakes, *Limnol.*  
 1360 *Oceanogr.*, 59, <https://doi.org/10.4319/lo.2014.59.2.0445>, 2014.
- 1361 Zhuang, Q., Guo, M., Melack, J.M., Lan, X., Tan, Z., Oh, Y., Leung, L. R.: Current and future global lake methane  
 1362 emissions: A process-based modeling analysis. *J. Geophys. Res.- Biogeo.*, 128,  
 1363 e2022JG007137, <https://doi.org/10.1029/2022JG007137>, 2023.
- 1364 Zimmermann, M., Mayr, M. J., Bouffard, D., Eugster, W., Steinsberger, T., Wehrli, B., Brand, A. Bürgmann,  
 1365 H.: Lake overturn as a key driver for methane oxidation, preprint, <https://doi.org/10.1101/689182>, 2019.
