# Supplementary material for: A new biogeochemical modelling framework (FLaMe v1.0) for lake methane emissions on the regional scale: Development and application to the European domain
Source: Copernicus journal article supplement (doi:10.5194/egusphere-2025-1306), 2025-03-28
Supplement: Supplementary file [file Manuscript_20250715_submit_tracked.pdf › Reply to Reviewer 1/Manuscript_20250715_submit_tracked.pdf]

1 **A new biogeochemical modelling framework (FLaMe-v1.0) for lake methane**  
2 **emissions on the regional scale: Development and application to the European**  
3 **domain**

4 Manon Maisonnier<sup>1</sup>, Maoyuan Feng<sup>1\*</sup>, David Bastviken<sup>2</sup>, Sandra Arndt<sup>1</sup>, Ronny Lauerwald<sup>3</sup>, Aidin  
5 Jabbari<sup>4</sup>, Goulven Gildas Laruelle<sup>1</sup>, Murray D. MacKay<sup>5</sup>, Zeli Tan<sup>6</sup>, Wim Thiery<sup>7</sup>, Pierre Regnier<sup>1</sup>

6 <sup>1</sup>Biogeochemistry and Modelling of the Earth System-BGEOSYS, Department of Geoscience,  
7 Environment and Society, Université Libre de Bruxelles, Brussels, Belgium

8 <sup>2</sup>Linköping University, Department of Thematic Studies, Tema Environmental Change, Sweden

9 <sup>3</sup>Université Paris-Saclay, INRAE, AgroParisTech, UMR Ecosys, Palaiseau, France

10 <sup>4</sup>Environmental Fluid Dynamics Laboratory, Department of Civil Engineering, Queen's University,  
11 Kingston, ON, Canada

12 <sup>5</sup>Science and Technology Branch, Environment and Climate Change Canada, Toronto, M3H5T4,  
13 Canada

14 <sup>6</sup>Pacific Northwest National Laboratory, Richland, WA, USA

15 <sup>7</sup>Department of Water and Climate, Vrije Universiteit Brussel, Brussels, Belgium

16

17 \*Correspondence to Maoyuan Feng ([maoyuan.feng@ulb.be](mailto:maoyuan.feng@ulb.be))

## Abstract

This study presents a new physical-biogeochemical modelling framework for simulating lake methane (CH<sub>4</sub>) emissions at regional scales. The new model, FLaMe-v1.0 (Fluxes of Lake Methane), rests on an innovative, computationally efficient lake clustering approach that enables the simulation of CH<sub>4</sub> emissions across a large number of lakes. Building on the Canadian Small Lake Model (CSLM) that simulates the lake physics, we develop a suite of biogeochemical modules to simulate transient dynamics of organic Carbon (C), Oxygen (O<sub>2</sub>), and CH<sub>4</sub>-cycling. We first test the performance of FLaMe-v1.0 by analyzing physical and biogeochemical processes in two theoretical lakes with characteristics that can be considered representative for many lakes (an oligotrophic, deep lake driven by cold climate *versus* a ~~trophi~~e~~eutrophic~~, shallow lake driven by warm climate). Next, we evaluate the model by comparing simulated and observed timeseries of CH<sub>4</sub> emissions in four well-surveyed lakes. We then apply FLaMe-v1.0 at the European scale to evaluate simulated diffusive and ebullitive lake CH<sub>4</sub> fluxes against *in-situ* measurements in both boreal and central European regions. Finally, we provide a first assessment of the spatio-temporal variability in CH<sub>4</sub> emissions from European lakes ~~smaller than with a surface area comprised between 0.1–1000 km<sup>2</sup>~~ (n=108407, total area = 1.33x10<sup>5</sup> km<sup>2</sup>), indicating a total emission of 0.97±0.23 Tg CH<sub>4</sub> yr<sup>-1</sup>, with the uncertainty constrained by combining FLaMe-v1.0 and machine learning techniques. Moreover, 30% and 70% of these CH<sub>4</sub> emissions are through diffusive and ebullitive pathways, respectively. Annually averaged CH<sub>4</sub> emission rates per unit lake area during 2010–2016 have a South-to-North decreasing gradient, resulting in a mean over the European domain as 7.39 g CH<sub>4</sub> m<sup>-2</sup> yr<sup>-1</sup>. Our simulations reveal a strong seasonality (with ice-blocking effects accounted for) in European lake CH<sub>4</sub> emissions, with ~~late summer emissions~~-nearly ten times higher emissions during late summer than during winter values. This pronounced seasonal variation highlights the importance of accounting for the sub-annual variability in CH<sub>4</sub> emissions to accurately constrain regional CH<sub>4</sub> budgets. In the future, FLaMe-v1.0

42 could be embedded into Earth System Models to investigate the feedback between climate warming  
43 and global lake CH<sub>4</sub> emissions.

## 44 1. Introduction

45 Methane (CH<sub>4</sub>) is the second most important greenhouse gas after carbon dioxide (CO<sub>2</sub>), with a  
46 Global Warming Potential (GWP) per mass ~28 times higher than that of CO<sub>2</sub> over a 100-year horizon  
47 (Saunois *et al.*, 2020). Over the last centuries, the atmospheric CH<sub>4</sub> concentration has increased from  
48 722 ppb in the pre-industrial period (year 1750) to 1923 ppb in year 2023 (Saunois, et al., 2020;  
49 Dlugokencky, 2022; Forster *et al.*, 2024) and this increase is expected to continue in the future. The  
50 critical role of CH<sub>4</sub> in global warming has called for the establishment of a comprehensive global  
51 CH<sub>4</sub> budget, which embraces both natural and anthropogenic sources (Saunois *et al.*, 2016; 2020;  
52 2024). This budget identified inland ~~waters (wetlands, freshwaters~~ (lakes, reservoirs, ponds, rivers,  
53 etc.) as an important, yet highly uncertain atmospheric CH<sub>4</sub> source (Jackson *et al.*, 2020, 2024;  
54 Saunois, *et al.*, 2020, Canadell *et al.*, 2021). Global lake CH<sub>4</sub> emissions, which has been estimated to  
55 account for ~5 to 20% of total CH<sub>4</sub> emissions (576 TgCH<sub>4</sub> yr<sup>-1</sup>), are the largest contributors to this  
56 inland water source (Jackson *et al.*, 2020; Saunois *et al.*, 2020). However, estimates of its magnitude  
57 vary depending on the assessment methods, with discrepancies of up to a factor of four (Saunois *et*  
58 *al.*, 2020; DelSontro and John 2018; Rosentreter *et al.*, 2021; Bastviken *et al.*, 2011; Deemer *et al.*,  
59 2016; Johnson *et al.*, 2021; Holgerson and Raymond 2016; Stavert *et al.* 2022). This variability in  
60 global estimates also manifests itself at the continental scale. For instance, estimates of European lake  
61 methane emissions range from 0.9 to 2.5 Tg CH<sub>4</sub> yr<sup>-1</sup> (Petrescu *et al.* 2021, 2023; Lauerwald *et al.*,  
62 2023).

63 Observation-based upscaling approaches are highly dependent on the availability and quality of  
64 *in-situ* measurements, which are unevenly distributed across the globe and biased towards summer  
65 months (Canadell *et al.*, 2021; Johnson *et al.*, 2022). Although the number of CH<sub>4</sub> emission

66 measurements from lakes has increased considerably in recent decades, the two largest current  
67 databases together contain only 1081 records from 575 lakes worldwide (Rosentreter *et al.*, 2021;  
68 Johnson *et al.*, 2022). This relatively small data compilation is unlikely to capture the full diversity  
69 of physical and biogeochemical patterns of >1.4 million lakes worldwide, which vary by morphology,  
70 climate, trophic status, and underlying sediment characteristics (Rinta *et al.*, 2017; Bastviken 2004,  
71 2022; Deemer and Holgerson 2021; Johnson *et al.*, 2022). Even more critically, the underlying data  
72 collection was not designed to capture the inter-annual and decadal variability in CH<sub>4</sub> emissions  
73 driven by climate change and nutrient dynamics, hence rendering the decomposition of the total lake  
74 CH<sub>4</sub> fluxes into natural and human-induced components challenging (Saunois *et al.*, 2020). Finally,  
75 although current instruments and techniques can effectively capture CH<sub>4</sub> fluxes through diffusive  
76 (driven by gradients of aqueous CH<sub>4</sub> concentrations) and ebullitive (via gas bubbles in the sediments  
77 due to oversaturation) emission pathways, measurements related to lake turnover events (release of  
78 previously accumulated CH<sub>4</sub> due to stratification and ice cover) [and transport through vegetation](#)  
79 [aerenchyma](#) remain highly challenging (Denfeld *et al.*, 2018; Mayr *et al.*, 2020; Zimmermann *et al.*,  
80 2019). These limitations induce large uncertainties in observation-based upscaling methods. In this  
81 context, process-based modelling approaches – that rely on detailed representations of lake physical  
82 and biogeochemical processes informed and tested with the available observational data – offer  
83 complementary strategies to help reduce these uncertainties.

84 Process-based biogeochemical models provide powerful tools to upscale scarce observations,  
85 both in space and in time. In combination with the available observational datasets, they can help  
86 deliver regional and global estimates of lake CH<sub>4</sub> emissions from daily to decadal timescales, as well  
87 as future projections. These mechanistic models can also help identify the drivers such as climate,

land-use and atmospheric composition changes responsible for the complex temporal dynamics of lake CH<sub>4</sub> emissions. Over the last decades, several process-based models have thus emerged, e.g., LAKE 2.0 (Stepanenko *et al.* 2016), bLake4Me (Tan *et al.*, 2015), and ALBM (Tan *et al.*, 2018; 2024), to estimate lake CH<sub>4</sub> emissions to the atmosphere. These models explicitly account for the physical and biogeochemical processes that govern lake CH<sub>4</sub> dynamics and resulting emissions. For instance, using ALBM, Zhuang *et al.* (2023) recently estimated that global lakes (larger than 0.1 km<sup>2</sup>) emit  $24.0 \pm 8.4$  Tg CH<sub>4</sub> yr<sup>-1</sup>, which is at the lower end of the range reported by Saunio *et al.* (2020) and represents 11% of total global CH<sub>4</sub> emissions from natural sources as estimated from atmospheric inversions. Yet, these process-based models also have limitations that need to be addressed. A central limitation is the omission of lake phytoplankton productivity, which is one of the most reactive organic C sources and thus substrates for CH<sub>4</sub> production. In most of existing models, this key process and the associated microbial degradation of organic C is not simulated explicitly but taken as prescribed model inputs. If phytoplankton productivity and associated contributions of methane substrates can be incorporated in lake CH<sub>4</sub> models, this would allow capturing the impacts of environmental conditions beyond the commonly included direct temperature effects on organic matter decomposition and CH<sub>4</sub> production. Such additional important impacts include feedback of C metabolism on lake oxygen (O<sub>2</sub>) cycling along with eutrophication effects on CH<sub>4</sub> emissions (Del Sontro *et al.*, 2018; Rosentreter *et al.*, 2021; Staver *et al.*, 2022). However, ~~including an explicit description of these processes it~~ is challenging, ~~because it requires to account for a~~ explicitly describe ~~the~~ suite of key physical and biogeochemical processes controlling the coupled C-O<sub>2</sub>-CH<sub>4</sub> cycles while at the same time maintaining model complexity, as well as the needs for observational data and computational costs for regional and global scale applications with tractable bounds. In addition, it

110 also requires the quantification of nutrient inputs from the surrounding catchments, which exert a key  
111 control on lake productivity.

112 To tackle ~~with~~ these challenges, we here develop a new process-based model framework of  
113 intermediate complexity, FLaMe-v1.0 (Fluxes of Lake Methane version 1.0, ~~hereafter referred as~~  
114 ~~FLaMe~~), that couples the C-O<sub>2</sub>-CH<sub>4</sub> cycles in lakes using a one-dimensional representation.  
115 Specifically, FLaMe-v1.0 builds upon the existing physical lake model CSLM (Canadian Small Lake  
116 Model–MacKay, 2012; MacKay *et al.*, 2017), and extends with a novel biogeochemical module that  
117 captures the production, oxidation, storage, transport and emissions of CH<sub>4</sub> in/from lakes. Importantly,  
118 FLaMe-v1.0 introduces lake primary production and turnover of autochthonous organic carbon as a  
119 major driver of lake O<sub>2</sub> and CH<sub>4</sub> dynamics. The coupled, mechanistic lake model is then embedded  
120 in a computationally efficient clustering approach that allows for the application of the new, coupled,  
121 mechanistic lake model for (i) large parameter/input ensemble runs on regional/global scales for  
122 uncertainty assessments, (ii) long-term model projections for the assessment of future climate change  
123 and its feedback on the Earth system, (iii) a potential coupling to Earth System Models (ESMs) in  
124 subsequent stages of its development.

125 The structure of this paper is described as follows. In section 2, we provide a general description  
126 of the lake model with a focus on a detailed description of the novel biogeochemical modules, as well  
127 as the parameter choices and numerical solutions. In section 3, we first test the overall behavior of  
128 FLaMe-v1.0 using two representative lakes (an oligotrophic, deep lake driven by cold climate *versus*  
129 a trophic, shallow lake driven by warm climate), and then evaluate the simulated temporal variations  
130 of CH<sub>4</sub> fluxes against observational data at four well-surveyed lakes in the real world. Next, we apply

FLaMe-v1.0 at the European scale and evaluate the results against *in-situ* measurements in boreal and central European lakes compiled by Rinta *et al.* (2017). Finally, we provide a spatio-temporally resolved estimate of CH<sub>4</sub> emissions from European lakes (2010–2016), assess their sensitivity to key model parameters, and constrain their uncertainty range using a machine-learning approach. In section 4, we discuss model limitations and potential directions for further research. Main conclusions and outlooks are drawn in section 5.

## 2. Methodology

### 2.1 General model approach

We developed a new process-based physical-biogeochemical model, FLaMe-v1.0 (Fluxes of Lake Methane), to simulate lake CH<sub>4</sub> production and emission at large spatial scales. FLaMe-v1.0 resolves the interplay of physical and biogeochemical processes that governs organic matter ( $C_{OC,auto}$ ), oxygen (O<sub>2</sub>), and methane (CH<sub>4</sub>) dynamics to estimate (diffusive and ebullitive) lake CH<sub>4</sub> emissions, as well as CH<sub>4</sub> storage fluxes due to lake turnover and ice melting. To enable a continental-scale application of FLaMe-v1.0 (e.g., in Europe,  $n=108407$  and total area =  $1.33 \times 10^5$  km<sup>2</sup> for lakes with  $0.1 \leq A_0 \leq 1000$  km<sup>2</sup> according to Messenger *et al.*, 2016;  $A_0$  is the lake surface area), we here propose a lake clustering strategy to reduce the computational and data/input costs (Fig. 1) while resolving the variability in lake sizes, morphology, and trophic status as well as climate conditions across Europe. Within each grid cell ( $2.5^\circ \times 2.5^\circ$ ), lakes are binned into four classes *arbitrarily* according to surface area (0.1–1 km<sup>2</sup>, 1–10 km<sup>2</sup>, 10–100 km<sup>2</sup>, 100–1000 km<sup>2</sup>). We then run a FLaMe-set-up-v1.0 simulation for one representative lake per size class within each grid cell, using the arithmetic means of lake area, depth and trophic status of all lakes pertaining to the respective size class across the respective grid cell. Note that the areas and depths of all lakes are available from HydroLAKES



153 database (Messenger *et al.*, 2016) while trophic status is derived from outputs of the GlobalNEWS  
 154 model (Mayorga *et al.*, 2010; Lauerwald *et al.*, 2019). The total emission flux from a given size class  
 155 can be obtained by multiplying the CH<sub>4</sub> emission rates simulated by FLaMe-v1.0 with the total lake  
 156 area of this size class (Fig. 1).

157

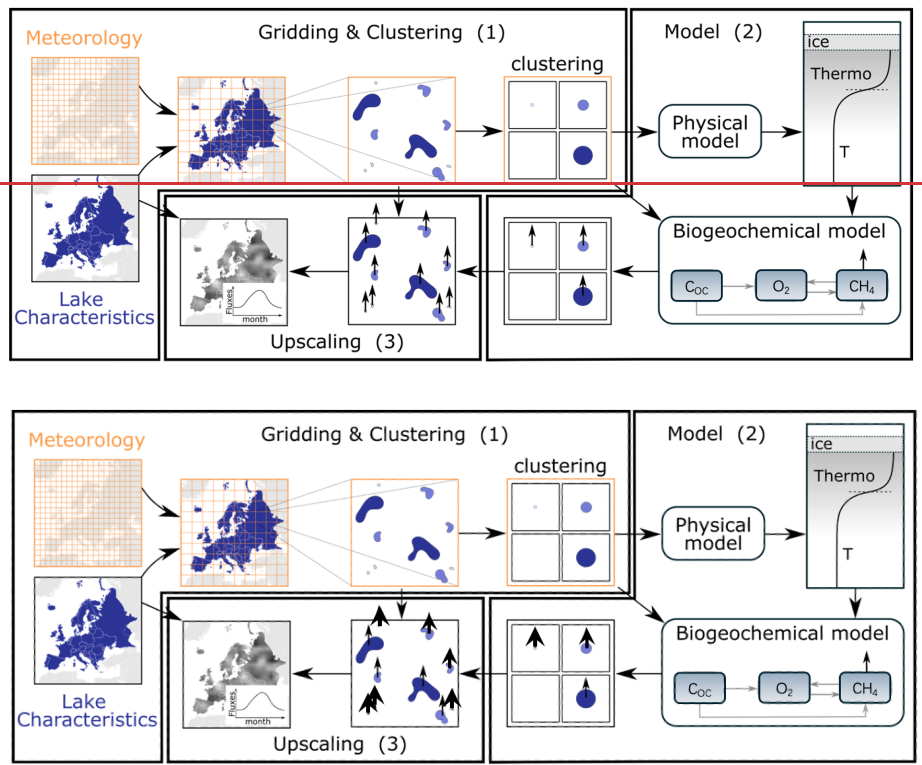

158

159 **Fig. 1. Illustration of the lake clustering and upscaling strategy for the continental application of FLaMe-v1.0**  
 160 (Europe as an example). (1) Gridding and clustering: The European domain was divided into grid cells at a coarse  
 161 spatial resolution of 2.5°×2.5°. Within each grid cell, lakes are clustered into four classes according to their surface  
 162 areas. (2) FLaMe-v1.0 parallelization: FLaMe-v1.0 simulates the lake metabolic dynamics, vertically resolved

163 concentration and rate profiles of the coupled O<sub>2</sub>-CH<sub>4</sub> cycle as well as diffusive and ebullitive CH<sub>4</sub> fluxes through  
164 the water-air interface. The model was parallelized under transient conditions for each grid cell and each lake  
165 class. (3) Upscaling: The areal rates (i.e., fluxes per unit lake surface area) simulated by FLaMe-v1.0 were then  
166 multiplied by the total surface area of each lake class within each grid cell (available from HydroLAKES) and  
167 aggregated at the monthly timescale. The arrows pertaining to clustered and original lakes represent the CH<sub>4</sub>  
168 emissions, and the arrow size represent the magnitude of the flux (i.e., a lower flux for larger lakes).

## 169 2.2 Model description

170 FLaMe-v1.0 builds on an online coupling approach between the Canadian Small Lake Model  
171 (CSLM; MacKay, 2012; MacKay *et al.*, 2017) – a widely used lake physics model (Garnaud *et al.*,  
172 2022; Versegghy and MacKay, 2017; William *et al.*, 2014) – and a set of newly developed  
173 biogeochemical modules that resolve lake OC, O<sub>2</sub> and CH<sub>4</sub> dynamics. We selected the CSLM as the  
174 basis of the representation of lake physical processes in FLaMe-v1.0 because CSLM was designed  
175 for small lakes that accounts for >90 % of lakes (by number, mean depth <7.8 m) but contribute  
176 disproportionally to lake CH<sub>4</sub> emissions in the European domain (HydroLAKES; Messenger *et al.*,  
177 2016), as well as due to the expertise in our research team. CSLM simulates the following physical  
178 variables: ~~of~~ temperature profile ( $T$ ), thermocline depth ( $h_{mix}$ , at which the vertical temperature  
179 gradient reaches its maximum), photic depth ( $h_{phot}$ , down to which the sunlight can penetrate, with  
180 radiation density of at least 1% of that at the lake surface), and ice cover, which will be used to force  
181 the biogeochemical modules (Fig. 2). In turn, the biogeochemical module will later modify the photic  
182 depth simulated by CSLM to account for the effect of phytoplankton growth and self-shading on light  
183 penetration, thus resolving the feedback between lake biogeochemical processes and lake physical  
184 dynamics, hence forming a complete feedback loop. A detailed description of the well-established

CSLM model can be found in MacKay (2012) and MacKay *et al.* (2017) and is also briefly presented in Supplementary Text S1. Compared with other lake models (Table S1), the most important improvements in FLaMe-v1.0 are the adoption of a “valley” shape lake set up and the incorporation of autochthonous carbon dynamics (i.e., explicit simulation of primary production, decomposition, and oxygen processes) and its phosphorus limitation, which have been shown to be key control factors of CH<sub>4</sub> dynamics (Søndergaard *et al.*, 2017; Guildford and Heckay, 2000; Schindler, 1977). In what follows, we provide a detailed description of the vertically resolved 1D model set-up (section 2.2.1) used here, as well as of the novel biogeochemical modules (section 2.2.2 ~~and Table 1 for selected model parameter values~~). All the involved model parameters, their values, and ranges are summarized in Table 1 (section 2.3).

### 2.2.1 Model Scope: Idealized representation of lake morphology

Figure 2 illustrates the vertically resolved, one-dimensional model set-up of FLaMe-v1.0 that is used for both the physical and biogeochemical modules. The original version of CSLM usually adopts a “bucket” shaped morphology which assumes a constant area ( $A$ ) versus water depth ( $z$ ), i.e.,  $A(z) = A_0$ , where  $A_0$  is the lake surface area at  $z = 0$  m. However, this morphology is unsuitable for the simulation of biogeochemical processes, especially when ~~the~~ variations in water depth within each lake are important. Therefore, we, instead, adopted a “valley” shaped lake morphology, with lake area  $A(z)$  given by:

$$A(z) = \frac{A_0}{2s} (s + \operatorname{arctanh}(1 - 2(z/h_{\max})) \tanh(s)) \quad (1)$$

where  $A$  is the lake area (m<sup>2</sup>),  $z$  is the water depth (m),  $s$  is a shape parameter that controls the slope of the lakebed (a larger  $s$  indicates a steeper slope), and  $h_{\max}$  is the maximum lake depth. To ensure

206 that the volume (and hence heat exchange) is conserved between the “bucket” and “valley” shape set-  
207 ups, the maximum depth of the valley-shape lake,  $h_{\max}$ , must be twice that of the mean depth of the  
208 bucket-shape lake,  $h_{\text{mean}}$  (i.e.,  $h_{\max} = 2h_{\text{mean}}$ ), which was extracted from the global HydroLAKES  
209 database compiled by Messenger *et al.* (2016). The bottom temperature profiles simulated by CSLM  
210 were then extended to the maximal depth of the valley shape lake.

211 Physical processes in the water column are simulated by CSLM, on a one-dimensional, vertically  
212 resolved, evenly distributed grid with a grid spacing of 50 cm. Each ~~layer of the water layer~~column  
213 is connected to a vertically integrated lake sediment column of 5 m depth ( $h_s$ , m) ([Langenegger \*et al.\*, 2019](#)),  
214 (Fig. 2). Since the CH<sub>4</sub> production rate decreases exponentially with sediment depth, ~~(not~~  
215 ~~applicable to thermokarst lakes)~~, it is typically negligible at 5 m within the sediment column,  
216 ([Langenegger \*et al.\*, 2019](#)), thus ensuring that the total, depth-integrated benthic CH<sub>4</sub> production  
217 becomes insensitive to this arbitrary choice ~~(Langenegger *et al.*, 2019)~~. The surface area of each  
218 sediment column in contact with the water column is determined by difference in the widths of two  
219 adjacent water layers  $A(z)$  (Eq. (1)). In addition, it should be noted that we assume no **horizontal**  
220 material exchanges (O<sub>2</sub> and CH<sub>4</sub>) between the sediments and water columns (i.e., across the interface  
221 where left and right edges of a water layer touch the sediment box; Fig. 2), ~~while~~because of its  
222 relatively minor magnitude compared to the vertical exchanges (Stepanenko *et al.*, 2016; Tan *et al.*,  
223 2024) as well as the lack of observational data. Therefore, only the vertical exchanges are simulated  
224 in this first version of the model (see details in the following sections).

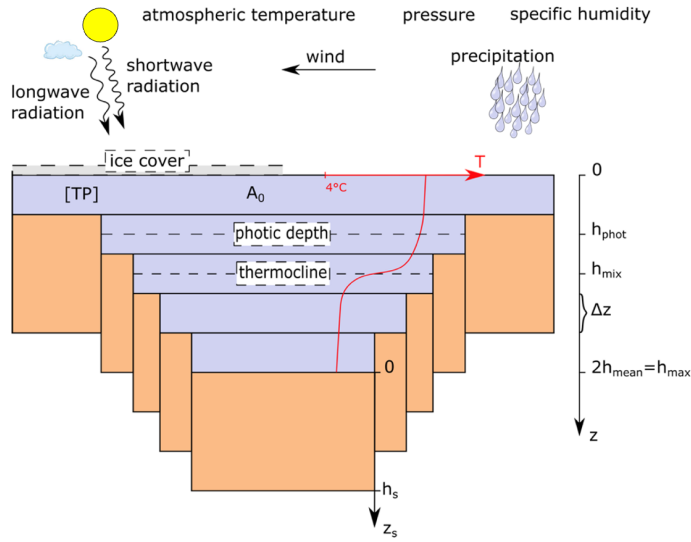

Fig. 2. Schematic representation of the lake morphology in FLAME-v1.0. The lake is represented by a “valley” shape (denoted by Eq. (1)).  $A_0$  denotes the lake surface area,  $A$  is the area of each water layer, and  $h_{max}$  is the maximal water column depth.  $z$  represents the depth of a water column down to the surface of a sediment column while  $z_s$  stands for the depth inside a sediment column ( $z_s = 0$  at the sediment water interface). The physical model is forced by longwave and shortwave radiation, near-surface wind, precipitation, atmospheric temperature, pressure, and specific humidity. Purple color indicates the water layers, and orange color indicates the sediment columns.

## 2.2.2 Biogeochemical Modules

### 2.2.2.1 Organic carbon module

Following the approach of Maavara *et al.* (2017), FLAME-v1.0 does not resolve the vertical distribution of labile (i.e., microbial degradable) organic carbon (OC) concentrations ( $[C_{OC,auto}]$ ) produced by in-lake primary production, but only simulates the temporal dynamics of the volume-

238 integrated autochthonous OC stock ( $\overline{C_{OC,auto}}$ , g C) (the overbar here indicates a volume-integrated  
 239 value).  $\overline{C_{OC,auto}}$  should be understood as a simple indicator or an overall reflection of the resulting  
 240 lake trophic status, itself controlled by the combined effects of climate and nutrient loads from the  
 241 catchment. The allochthonous C inputs delivered from surrounding catchments are more refractory  
 242 and ~~thus perform as less important substrates for CH<sub>4</sub> production (generally have a slower~~  
 243 ~~decomposition rate (Grasset *et al.*, 2018; Guillemette *et al.*, 2017; DelSontro *et al.*, 2018-2018),~~  
 244 ~~although CH<sub>4</sub> production from allochthonous OC has in some instances been reported to be higher~~  
 245 ~~than from autochthonous compounds in laboratory incubations (Grasset *et al.*, 2018).~~ Thus, ~~we~~  
 246 ~~consider the allochthonous OC as less important substrates for CH<sub>4</sub> production, and consider the~~  
 247 ~~autochthonous primary production is considered as the only labile OC source, neglecting in this first~~  
 248 ~~model version; the allochthonous OC contribution in this first version will be added in the future~~  
 249 ~~upgrade of FLaMe the model.~~

250 The temporal evolution of volume-integrated labile OC stock is determined by the interplay  
 251 between autochthonous primary production, pelagic and benthic mineralization and burial fluxes  
 252 (Maavara *et al.*, 2017):

$$253 \quad \frac{\partial \overline{C_{OC,auto}}}{\partial t} = \overline{F_{PP}} - \overline{F_{Min}} - \overline{F_{Bur}} \quad (2)$$

254 where  $t$  is time (day), and  $\overline{C_{OC,auto}}$  is the volume-integrated OC stock (g C).  $\overline{F_{PP}}$ ,  $\overline{F_{Min}}$  and  $\overline{F_{Bur}}$  are  
 255 the volume-integrated primary production, mineralization, and sedimentary burial fluxes (g C d<sup>-1</sup>),  
 256 respectively. Following Maavara *et al.* (2017), we assume that autochthonous primary production  
 257 rates are controlled by the light regime, water temperature, and the lake total dissolved phosphorus

258 ( $\overline{F_{PP}}$ ) concentration ( $\overline{F_{PP}}$ , g P m<sup>-3</sup>) (Reynolds, 2006). The volume-integrated  $\overline{F_{PP}}$  can then  
 259 be expressed using a classical Michaelis-Menten formulation (Mavaara *et al.*, 2017):

$$260 \quad \overline{F_{PP}} = B P_{Chl,max} M(T_{mean}) \frac{[TP]}{K_{s,P} + [TP]} \frac{[TP]}{K_{s,P} + [TP]} V_{phot} \quad (3)$$

261 where  $B$  is the phytoplankton biomass (expressed as chlorophyll-a concentration, g Chl-a m<sup>-3</sup>) in the  
 262 photic zone (Eq. (5)),  $P_{Chl,max}$  is the maximum carbon fixation rate per unit of chlorophyll-a (g C (g  
 263 Chl-a)<sup>-1</sup> h<sup>-1</sup>),  $M$  is a dimensionless metabolic correction factor that depends on the mean lake water  
 264 temperature in photic zone  $T_{mean}$  (°C) (see Eq. (4)),  $K_{s,P}$  is the half-saturation constant for phosphorus  
 265 limitation (g P m<sup>-3</sup>), and  $V_{phot}$  is the water volume above the photic depth (m<sup>3</sup>). Parameters  $P_{Chl,max}$   
 266 and  $K_{s,P}$  are constrained based on published observations (see section 2.3), while the metabolic factor  
 267  $M$  is given by:

$$268 \quad M(T_{mean}) = \begin{cases} 1, & T_{mean} \geq 28^\circ\text{C} \\ Q_{10,prod}^{\frac{T_{mean}-28}{10}}, & T_{mean} < 28^\circ\text{C} \end{cases} \quad (4)$$

269 where  $Q_{10,prod}$  is the temperature sensitivity for primary production, quantifying the increases of the  
 270 metabolic factor per 10 degree increase in temperature. Surface water phytoplankton biomass,  $B$ , is  
 271 approximated by a function of the photosynthetically active radiation ( $PAR$ ), which is determined  
 272 by shortwave radiation and light extinction in the water column:

$$273 \quad B = \left(\frac{1}{k_c}\right) (0.75 \left(\frac{PP}{RP}\right) \ln \left(\frac{0.7 PAR_0}{0.5 PAR_k}\right) \left(\frac{1}{h_{prod}}\right) - (K_{dw} + K_{dp} + K_{dg})) \quad (5)$$

274 where  $k_c$  is the absorbance of  $PAR$  per unit of chlorophyll-a (m<sup>2</sup> (g Chl-a)<sup>-1</sup>), and  $PP/RP$  is the ratio  
 275 of maximum gross photosynthesis to respiration per unit chlorophyll-a.  $PAR_0$  is the  $PAR$  at the lake  
 276 surface (μmol m<sup>-2</sup> s<sup>-1</sup>), determined by the incoming shortwave radiation, as well as the daytime that  
 277 is specified by lake latitude and phenology (represented by the day of the year).  $PAR_k$  is the  $PAR$  at

the onset of photosaturation ( $\mu\text{mol m}^{-2} \text{s}^{-1}$ ). The productive depth  $h_{prod}$  is determined as the maximum of the thermocline and the photic depth simulated by the physical model.  $K_{dw}$ ,  $K_{dp}$ , and  $K_{dg}$  represent nonalgal *PAR* attenuations, due to pure water, inorganic suspended particulate matter, and labile carbon, respectively. Following Lewis (2011),  $K_{dg}$  is calculated as a function of  $[C_{OC,auto}]$  as:

$$\ln(K_{dg}) = -4.44 + 1.80\ln([C_{OC,auto}]) - 0.149(\ln([C_{OC,auto}]))^2. \quad (6)$$

Eq. (5) was derived based on the assumption of a balance between production and respiration (Reynolds, 2006; Lewis, 2011). Here we slightly relax this assumption and assume near-equilibrium conditions for given climate conditions at the monthly timescale, allowing us to simulate seasonal variations of primary production and associated biogeochemical processes. Note that this assumption is only used for biogeochemical variables related to primary production, while physical variables simulated by CSLM are resolved at a sub-daily time step.

Following Hanson *et al.* (2011; 2014) and Maavara *et al.* (2019), the volume-integrated mineralization rate is simulated as a function of temperature and labile OC availability:

$$\overline{F_{Min}} = k_{20} \theta^{T_{mean}-20} \overline{C_{OC,auto}} \quad (7)$$

where  $k_{20}$  is a first-order rate constant for the mineralization of  $\overline{C_{labile}}$  at 20 °C ( $\text{d}^{-1}$ ).  $T_{mean}$  is the mean water temperature (°C) in photic zone, and  $\theta$  is the temperature dependence of mineralization of organic matter (Hanson *et al.*, 2014).

Following Maavara *et al.* (2019), the burial flux  $\overline{F_{Bur}}$  is represented by a first order process driven by the labile OC stock  $\overline{C_{OC,auto}}$ :



$$\overline{F_{Bur}} = k_{bur} \overline{C_{OC,auto}} \quad (8)$$

where  $k_{bur}$  is the burial rate constant and here set as half of the mineralization rate constant following the ratios between these two processes reported in the global lake dataset ( $n=230$ ) assembled by Mendonça *et al.* (2017). This ratio is likely an upper bound because it accounts for contributions of both autochthonous and allochthonous carbon sources in the dataset, while allochthonous inputs should have ~~distinct (but unquantified)~~ higher burial/decomposition ratios ~~from than~~ autochthonous ones (Mendonça *et al.*, 2017; Guillemette *et al.*, 2017).

#### 2.2.2.2 Methane module

The methane module simulates the dynamics of  $\text{CH}_4$  concentration in both sediment and water columns as controlled by ~~benthic~~  $\text{CH}_4$  production, aerobic  $\text{CH}_4$  oxidation, and diffusive and ebullitive transport from sediment to water and atmosphere (Fig. 3). Since the observational evidence suggests that benthic  $\text{CH}_4$  production is the dominant  $\text{CH}_4$  source in lakes (Tan *et al.*, 2015; Bastviken, 2022), we neglect the  $\text{CH}_4$  production within the lake's water column in the model.

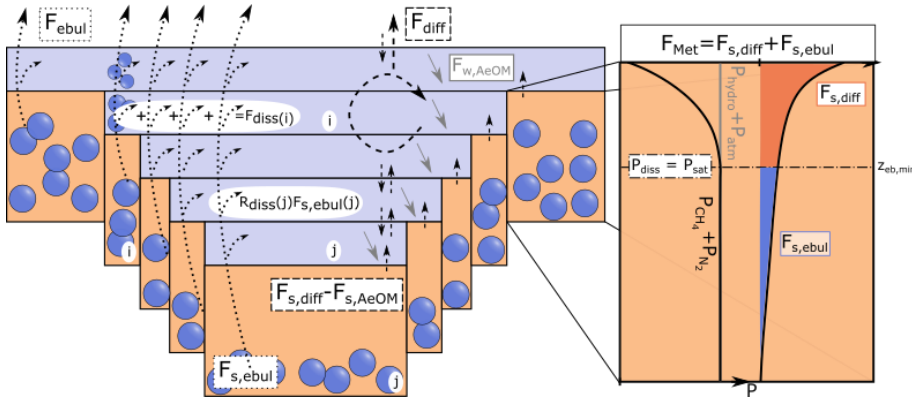

**Fig. 3. Illustration of the methane (CH<sub>4</sub>) module of FLAME with a zoom into benthic CH<sub>4</sub> dynamics (zoom modified from Langenegger *et al.*, 2019). Benthic CH<sub>4</sub> production (zoom) assumes an exponential decrease in CH<sub>4</sub>**

314 production rate ( $F_{Met}$ ) with depth. The  $CH_4$  and  $N_2$  partial pressures ( $P_{CH_4} + P_{N_2}$ ) is mainly driven by the  $CH_4$   
 315 production and follows the black curve profile, which starts to exceed the sum of the hydrostatic and atmospheric  
 316 pressure ( $P_{hydro} + P_{atm} - P_{H_2O}$ , grey line) at  $z_{eb,min}$ . Thus, this depth ( $z_{eb,min}$ ) divides  $F_{Met}$  into a diffusive ( $F_{s,diff}$ , red  
 317 filled region) and an ebullitive ( $F_{s,ebul}$ , cyan filled region) flux.  $F_{s,AeOM}$  and  $F_{w,AeOM}$  are the  $CH_4$  oxidation in the  
 318 sediment and water column, respectively.  $F_{diss}$  is the dissolution of the gas bubbles during transport through the  
 319 water column.  $F_{diff}$  and  $F_{ebul}$  are diffusive and ebullitive  $CH_4$  fluxes through the water-air interface, respectively. i  
 320 and j are the indexes of water layers and sediment columns. Note that the sediment column pertaining to a  
 321 particular water layer has the same index as that water layer.

322 Within the lake sediment,  $CH_4$  dynamics are determined by the balance between  $CH_4$  production  
 323 via methanogenesis and  $CH_4$  migration to the water column through diffusive and ebullitive  
 324 transport:

$$325 \quad \frac{\partial CH_{4,s}(z)}{\partial t} = \widetilde{F_{Met}}(z) - \widetilde{F_{s,diff}}(z) - \widetilde{F_{s,ebul}}(z) \quad (9)$$

$$326 \quad \widetilde{F_{Met}}(z) = f_{mm} \frac{M_{CH_4}}{M_C} \overline{F_{Min}} \frac{V_s(z)}{V_{s,tot}} \quad (10)$$

327 where the tilde overbar here represents the volume-integrated stocks or fluxes in the sediment  
 328 column, which is different from the straight overbar for volume-integrated values in the water  
 329 column. Note that we have sediment columns at different water depths, such that the stocks and  
 330 fluxes are represented as a function of water depth  $z$ , which is characterized by the valley-shape  
 331 model set-up and different from the conventional bucket shape set-up.  $CH_{4,s}(z)$  is thus the volume-  
 332 integrated  $CH_4$  stock for the sediment column with the sediment-water interface positioned at depth  
 333  $z$  (g  $CH_4$ ).  $\widetilde{F_{Met}}(z)$  is the volume-integrated flux of  $CH_4$  production through the entire sediment  
 334 column with a sediment-water interface at depth  $z$  (g  $CH_4$  d<sup>-1</sup>), and  $\widetilde{F_{s,diff}}(z)$  and  $\widetilde{F_{s,ebul}}(z)$  are

335 volume-integrated diffusive and ebullition fluxes ( $\text{g CH}_4 \text{ d}^{-1}$ ) through the sediment-water interface  
 336 at depth  $z$ , respectively.  $f_{\text{mm}}$  denotes the fraction of organic matter mineralization that proceeds via  
 337 methanogenesis according to data compiled by Hanson *et al.* (2014) and Bastviken (2022).  $M_{\text{CH}_4}/M_{\text{C}}$   
 338 is a conversion factor corresponding to the molar ratio of  $\text{CH}_4$  to  $\text{COC}_{\text{auto}}$ . As  $f_{\text{mm}} \frac{M_{\text{CH}_4}}{M_{\text{C}}} \overline{F_{\text{Min}}}$  is the  
 339 total  $\text{CH}_4$  production flux integrated over the whole water column, we assume that the fractions of  
 340  $\text{CH}_4$  production occurring in different sediment columns are set according to their volume  
 341 proportions, i.e.,  $\frac{V_s(z)}{V_{s,\text{tot}}}$ .

342 The partitioning of  $\text{CH}_4$  production into ebullitive and diffusive fluxes depends on the porewater  
 343  $\text{CH}_4$  concentration or its partial pressure, which relies mainly on the vertical distribution of  $\text{CH}_4$   
 344 production rate in the sediment as well as the oxygen concentration (but is of second-order  
 345 importance). Based on the observation-based assumption that the organic carbon concentration and  
 346 thus mineralization rates exponentially decrease with sediment depth, we here assume an  
 347 exponentially decreasing relationship between methanogenesis rate versus depth (Fig. 3), following  
 348 Langenegger *et al.* (2019):

$$349 \quad f_{\text{met}}(z, z_s) = F_{\text{Met},0}(z) \exp(-\alpha z_s) \quad (11)$$

350 where  $f_{\text{met}}(z, z_s)$  is the methanogenesis rate ( $\text{g CH}_4 \text{ m}^{-3} \text{ d}^{-1}$ ) at sediment depth  $z_s$  for the sediment  
 351 column with the sediment-water interface positioned at depth  $z$ .  $F_{\text{Met},0}(z)$  is the maximum  $\text{CH}_4$   
 352 production at the sediment-water interface ( $\text{g CH}_4 \text{ m}^{-3} \text{ d}^{-1}$ ) at depth  $z$ , and  $\alpha$  is a shape parameter  
 353 ( $\text{m}^{-1}$ ) that controls the decrease of methanogenesis rate with depth. As the shape of this curve  
 354 typically depends on the flux of labile carbon settling on the lake bottom, and thus, lake trophic  
 355 status, the parameter  $\alpha$  is here scaled by the  $F_{\text{PP}}$  empirically:

$$\alpha = \alpha_{min} + \beta \cdot F_{PP} \frac{V_w}{V_{phot}} \quad (12)$$

where  $\alpha_{min}$  is the minimum or base value, and  $\beta$  is the dependence of  $\alpha$  on  $F_{PP}$ . The values of  $\alpha_{min}$  and  $\beta$  are determined based on the measurements in lakes of different trophic status reported by Langenegger *et al.* (2019).

To determine the maximum CH<sub>4</sub> production  $F_{Met,0}(z)$ , the integral of CH<sub>4</sub> production rate over sediment column should equal to the volume-integrated CH<sub>4</sub> production flux  $\overline{F_{Met}}(z)$  as specified by Eq. (10):

$$A_s(z) \int_0^{h_s} f_{met}(z, z_s) dz_s = \overline{F_{Met}}(z) \quad (13)$$

where  $A_s(z)$  is the surface area of sediment column in contact with the water layer at lake depth  $z$  and is determined by difference in the areas of two adjacent water layers  $A(z)$  (Eq. (1)). The maximum CH<sub>4</sub> production at depth  $z$ ,  $F_{Met,0}(z)$ , can be obtained by combining Equations (10), (11) and (13):

$$F_{Met,0}(z) = \frac{\overline{F_{Met}}(z)}{A_s(z)} \frac{\alpha}{1 - \exp(-\alpha h_s)} \quad (14)$$

Since CH<sub>4</sub> production increases the *in-situ* CH<sub>4</sub> concentration as the sediment depth increases, the CH<sub>4</sub> concentration may exceed its solubility concentration and methane gas bubbles may start forming (Fig. 3). To constrain the partitioning of CH<sub>4</sub> production between diffusion and ebullition, the threshold sediment depth,  $z_{eb,min}$ , at which CH<sub>4</sub> concentration starts to exceed the solubility limit, is determined based on the equilibrium pressure condition following Langenegger *et al.* (2019) (see details in Supplementary Text S2). In the upper portion of the sediment column ( $z_s < z_{eb,min}$ ), the

376 produced CH<sub>4</sub> will diffuse into water; however, a fraction of the diffusing CH<sub>4</sub> will be oxidized in  
 377 the transit through the upper sediment column, and only the remaining CH<sub>4</sub> will reach the sediment-  
 378 water interface. The volume-integrated CH<sub>4</sub> oxidation in the sediment at depth  $z$ ,  $\widetilde{F_{s,AeOM}}(z)$ , is here  
 379 assumed to be controlled by the O<sub>2</sub> concentration in the overlying bottom water, and is represented  
 380 by a Michaelis-Menten function:

$$381 \quad \widetilde{F_{s,AeOM}}(z) = \widetilde{F_{Met}}(z) \frac{[O_2]_z}{K_{s,O_2} + [O_2]_z} \quad (15)$$

382 where  $K_{s,O_2}$  is the half-saturation constant of O<sub>2</sub> for the sedimentary CH<sub>4</sub> oxidation. As a result, the  
 383 diffusive flux passing through the sediment-water interface is determined as follows:

$$384 \quad \widetilde{F_{s,diff}}(z) = A_s(z) \int_0^{z_{eb,min}} \widetilde{F_{Met,0}}(z) \exp(-\alpha z_s) dz_s - \widetilde{F_{s,AeOM}}(z) \quad (16)$$

385 In the lower portion of the sediment column ( $z_s > z_{eb,min}$ ; where oversaturation occurs), the  
 386 produced CH<sub>4</sub> feeds the ebullitive flux, with the volume-integrated value  $\widetilde{F_{s,ebul}}(z)$  (g CH<sub>4</sub> d<sup>-1</sup>) as  
 387 given by:

$$388 \quad \widetilde{F_{s,ebul}}(z) = A_s(z) \int_{z_{eb,min}}^{h_s} \widetilde{F_{Met,0}}(z) \exp(-\alpha z_s) dz_s \quad (17)$$

389 Note that Equations. (16) and (17) implicitly imply that, at the monthly resolution of our model, the  
 390 CH<sub>4</sub> dynamics in the sediment is at steady state and all the CH<sub>4</sub> produced during this time interval  
 391 is either oxidized or released through the water column via diffusive and ebullitive pathways.

392

393 Pelagic, dissolved CH<sub>4</sub> diffuses in the water column and its concentration is determined by the  
 394 diffusive CH<sub>4</sub> flux passing through the sediment-water interface (acting as a source for each water  
 395 layer), by aerobic CH<sub>4</sub> oxidation in the water column, and by the re-dissolution of the ebullitive CH<sub>4</sub>

396 fluxes during transit through the water column. The mass conservation equation of dissolved CH<sub>4</sub> is  
 397 then given by:

$$398 \quad \frac{\partial[\text{CH}_4]_w}{\partial t} = \frac{\partial}{\partial z} \left( K_{diff} \frac{\partial[\text{CH}_4]_w}{\partial z} \right) + \widetilde{F_{s,diff}}(z) \frac{I}{A(z)dz} - F_{w,AeOM}(z) + F_{diss}(z) \quad (18)$$

399 where [CH<sub>4</sub>]<sub>w</sub> is the pelagic CH<sub>4</sub> concentration (g CH<sub>4</sub> m<sup>-3</sup>) and K<sub>diff</sub> is the eddy diffusion coefficient  
 400 of CH<sub>4</sub> in water (m<sup>2</sup> d<sup>-1</sup>).  $\widetilde{F_{s,diff}}(z) \frac{I}{A(z)dz}$  is the change of CH<sub>4</sub> concentration induced by diffusive  
 401 inputs from the sediment columns, the term A(z)dz being the volume of the water layer connected  
 402 to the corresponding sediment column. F<sub>w,AeOM</sub>(z) is the aerobic CH<sub>4</sub> oxidation rate in the water  
 403 column, and is described through double Michaelis-Menten reaction kinetics (Stepanenko *et al.*,  
 404 2016; Liikanen *et al.*, 2002; Thottathil and Prairie, 2019):

$$405 \quad F_{w,AeOM}(z) = k_{max} Q_{10,ox}^{\frac{T-T_r}{10}} \frac{[\text{CH}_4]_{w,z}}{K_{s,\text{CH}_4} + [\text{CH}_4]_{w,z}} \frac{[\text{O}_2]_z}{K_{s,\text{O}_2} + [\text{O}_2]_z} \quad (19)$$

406 where k<sub>max</sub> is the maximum CH<sub>4</sub> oxidation rate (Liikanen *et al.* 2002), T is the water temperature, T<sub>r</sub>  
 407 is the reference temperature, and Q<sub>10,ox</sub> expresses the temperature dependency of the CH<sub>4</sub> oxidation  
 408 rate. K<sub>s,CH<sub>4</sub></sub> and K<sub>s,O<sub>2</sub></sub> are the half-saturation constants for CH<sub>4</sub> and O<sub>2</sub>, respectively.

409 To constrain the redissolution of gas bubbles (F<sub>diss</sub>(z)), we follow the approach proposed by  
 410 McGinnis *et al.* (2006) where a function (f<sub>bdiss</sub>(z)) is used to represent the fraction of the benthic  
 411 ebullitive CH<sub>4</sub> flux that redissolves in the water column during gas ascent. This fraction is a function  
 412 of water depth and gas bubble diameter, and the latter was set to 5 mm following Delwiche and  
 413 Hemond (2017). With this function f<sub>bdiss</sub>(z), the redissolved CH<sub>4</sub> fluxes from sediment column at  
 414 depth z are assumed to be evenly redistributed in the water layers above the sediment, i.e.,

$$415 \quad f_{rediss}(z) = \frac{f_{bdiss}(z) \widetilde{F_{s,ebul}}(z)}{\int_0^z A(z)dz} \quad (20)$$

416 where  $\int_0^z A(z)dz$  is the water volume above the sediment layer at the depth of interest  $z$ . Then, at  
 417 this particular depth  $z$ , the redissolution flux ( $F_{diss}$ , g CH<sub>4</sub> m<sup>-3</sup> d<sup>-1</sup>) is thus determined as follows:

$$418 \quad F_{diss}(z) = \int_z^{h_{max}} f_{rediss}(z)dz \quad (21)$$

419 where  $\int_z^{h_{max}} f_{rediss}(z)dz$  represents the integral of all re-dissolved ebullitive fluxes from sediment  
 420 columns below  $z$ .

421 By deducing this dissolution flux from the ebullitive flux released from lake sediments, the  
 422 resultant ebullitive flux reaching the atmosphere ( $F_{ebul}$ ; g CH<sub>4</sub> m<sup>-2</sup> d<sup>-1</sup>) is calculated as:

$$423 \quad F_{ebul} = \frac{1}{A_0} \int_0^{h_{max}} (1 - f_{bdiss}(z)) \widetilde{F_{s,ebul}}(z)dz \quad (22)$$

424 where  $A_0$  is the lake surface area, and  $(1 - f_{bdiss}(z)) \widetilde{F_{s,ebul}}(z)$  is the component of ebullitive flux at  
 425 depth  $z$  that reaches the atmosphere.

426 In addition to diffusive and ebullitive pathways, FLAME-v1.0 also calculates a storage flux ( $F_{stor}$ )  
 427 that encapsulates the changes in the total CH<sub>4</sub> mass stored in hypolimnion due to the weakening of  
 428 lake stratification or turnover events when the lake surface temperature ~~erosses~~approaches the  
 429 ~~threshold of critical temperature~~ 4°C (MacKay, 2012; MacKay *et al.*, 2017). This results in a full  
 430 mixing of the lake that releases the previously accumulated CH<sub>4</sub> in the anoxic portion of the lake  
 431 and concomitantly fully aerates the water column. Lake turnovers thus lead to a complete  
 432 homogenization of O<sub>2</sub> and CH<sub>4</sub> concentration across the vertically resolved water column. Before  
 433 lake turnover, the lake water is highly stratified, blocking the material exchange between upper and  
 434 lower water layers, such that bottom water has high CH<sub>4</sub> concentration (even oversaturated) and low  
 435 O<sub>2</sub>, while the upper water has high O<sub>2</sub> concentration and low CH<sub>4</sub> concentration. Upon full mixing,

remobilization of larger CH<sub>4</sub> stocks that accumulated in the hypolimnion abruptly increase the CH<sub>4</sub> concentration near the lake surface, and hence strongly enhance the diffusive flux through the air-water interface. ~~That is, the storage flux in FLAME; in the meantime, O<sub>2</sub> in the upper layers can penetrate to deep water layers and start oxidizing the CH<sub>4</sub> throughout the entire water column. After full mixing, the CH<sub>4</sub> emissions and oxidation are both simulated based on O<sub>2</sub> and CH<sub>4</sub> concentrations within each water layers. That is, the storage flux in FLAME-v1.0~~ is not simulated separately but it is implicitly incorporated into the diffusive flux  $F_{diff}$  which increases dramatically following the formation of a very sharp CH<sub>4</sub> concentration gradient at the lake surface.

#### 2.2.2.3 Oxygen module

The oxygen module is needed to simulate the lake methane processes (section 2.2.2.2). It represents the O<sub>2</sub> cycle within the water column, driven by O<sub>2</sub> production by photosynthesis, O<sub>2</sub> consumption by pelagic and benthic OC mineralization, and aerobic pelagic and benthic CH<sub>4</sub> oxidation. These processes are coupled to the vertical diffusive transport of O<sub>2</sub> through water column (Fig. 4). The one-dimensional conservation equation for O<sub>2</sub> concentration in the water column is thus given by:

$$\frac{\partial [O_2]}{\partial t} = \frac{\partial}{\partial z} (K_{diff} \frac{\partial [O_2]}{\partial z}) + OF_{PP}(z) - OF_{w,Aer}(z) - \frac{I}{A(z)dz} OF_{s,Aer}(z) - OF_{w,AeOM}(z) - OF_{s,AeOM}(z) \quad (23)$$

where [O<sub>2</sub>] is the O<sub>2</sub> concentration in the water (g O<sub>2</sub> m<sup>-3</sup>), and  $K_{diff}$  is the eddy diffusion coefficient of O<sub>2</sub> (m<sup>2</sup> d<sup>-1</sup>), assumed identical to that of CH<sub>4</sub>.  $OF_{PP}(z)$  is the oxygen production through primary production (g O<sub>2</sub> m<sup>-3</sup> d<sup>-1</sup>) at depth  $z$ .  $OF_{w,Aer}(z)$  is the O<sub>2</sub> consumption by heterotrophic respiration (g O<sub>2</sub> m<sup>-3</sup> d<sup>-1</sup>) in the water column at depth  $z$ , while  $OF_{s,Aer}(z)$  is the volume-integrated O<sub>2</sub> consumption by heterotrophic respiration in the sediment (g O<sub>2</sub> m<sup>-3</sup> d<sup>-1</sup>), and  $A(z)dz$  is the volume of the water layer connected to the corresponding sediment column.  $OF_{w,AeOM}(z)$  and  $OF_{s,AeOM}(z)$  are



the aerobic  $\text{CH}_4$  oxidation in the water column and sediment ( $\text{g O}_2 \text{ m}^{-3} \text{ d}^{-1}$ ), respectively, at depth  $z$ .

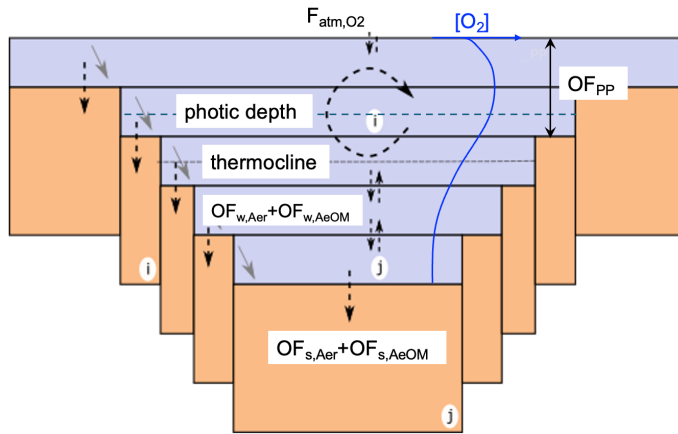

Fig. 4. Illustration of the oxygen ( $\text{O}_2$ ) module in the FLAME-model-v1.0. The  $\text{O}_2$  production due to primary production occurs only in the photic zone ( $\text{OF}_{PP}$ ), while the  $\text{O}_2$  consumption by heterotrophic respiration occurs in both the entire pelagic zone and benthic zone ( $\text{OF}_{w,Aer}$  and  $\text{OF}_{s,Aer}$ ). The  $\text{O}_2$  consumption due to  $\text{CH}_4$  oxidation occurs also in both pelagic and benthic zones ( $\text{OF}_{w,AeOM}$  and  $\text{OF}_{s,AeOM}$ ). In this figure, the dotted arrows crossing the sediment-water interface represent the  $\text{O}_2$  demands in sediments ( $\text{OF}_{s,Aer}$  and  $\text{OF}_{s,AeOM}$ ), the dashed arrows represent the eddy diffusion of  $\text{O}_2$  between water layers and through the water-air interface, and the tilted grey arrows represent the aerobic oxidation of  $\text{CH}_4$  in the water column. As a result, the blue curve depicts a typical vertical profile of  $\text{O}_2$  concentration under lake water stratification.

Photosynthesis occurs only in the photic zone, and the amount of  $\text{O}_2$  produced by primary production  $\overline{\text{OF}_{PP}}$  (volume-integrated value;  $\text{g O}_2 \text{ d}^{-1}$ ) can be determined according to the stoichiometric ratio  $M_{\text{O}_2}/M_C$ , where  $M_{\text{O}_2}$  and  $M_C$  are the molar masses of oxygen and carbon,

472 respectively. To resolve the vertical O<sub>2</sub> profile, the O<sub>2</sub> produced during primary production is  
 473 assumed to be evenly redistributed within the water layers above the photic depth (Fig. 4):

$$474 \quad OF_{PP}(z) = \begin{cases} \overline{F_{PP}} \frac{1}{V_{phot}} \frac{M_{O_2}}{M_C}, & z < z_{phot} \\ 0, & z \geq z_{phot} \end{cases} \quad (24)$$

475 where  $V_{phot}$  is the photic volume.

476 The oxygen consumption induced by CH<sub>4</sub> oxidation in the sediment and water column can be  
 477 calculated from corresponding CH<sub>4</sub> fluxes (Eqs. (15) and (19), respectively) and the stoichiometry  
 478 of the reactions involved:

$$479 \quad OF_{s,AeOM}(z) = \frac{2M_{O_2}}{M_{CH_4}} F_{s,AeOM}(z) \quad (25)$$

$$480 \quad OF_{w,AeOM}(z) = \frac{2M_{O_2}}{M_{CH_4}} F_{w,AeOM}(z) \quad (26)$$

481 As in Eq. (10), a fraction of the mineralized organic carbon (represented by  $f_{mm}$ ) is channeled  
 482 into the methanogenesis pathway according to the data compiled by Hanson *et al.* (2014) and  
 483 Bastviken (2009). Thus, the remaining fraction ( $1-f_{mm}$ ) of the total mineralization  $\overline{F_{Min}}$  is channeled  
 484 into the aerobic metabolic pathway ( $F_{Aer}$ ). As a result, the *bulk volumetric rate* of oxygen  
 485 consumption due to the aerobic metabolic activity ( $OF_{Aer}$ ) can be represented by the fraction  $1-f_{mm}$   
 486 and the volume-integrated mineralization  $\overline{F_{Min}}$ :

$$487 \quad OF_{Aer} = (1-f_{mm}) \overline{F_{Min}} \frac{1}{V_w} \frac{M_{O_2}}{M_C} \quad (27)$$

488 In the sediment, the aerobic mineralization occurs only in the upper oxic layer. The thickness  
 489 of this aerobic layer is limited by the oxygen penetration depth  $z_{ox}$ . Following Ruardij and Van

490 Raaphorst (1995), this depth  $z_{ox}$  can be derived by solving the steady-state reaction-diffusion  
 491 equation for  $O_2$  in the sediment:

$$492 \quad z_{ox} = \sqrt{\frac{2K_{s,diff}}{OF_{s,AeOM} + OF_{Aer}}} \quad (28)$$

493 where  $K_{s,diff}$  is the molecular diffusion coefficient within the sediment, which is dependent on the  
 494 temperature (Ruardij and Van Raaphorst, 1995). The amount of  $O_2$  consumed within the oxic layers  
 495 of the sediment can thus be determined as:

$$496 \quad \widetilde{OF_{s,Aer}}(z) = OF_{Aer} A_s(z) z_{ox} \quad (29)$$

497 where  $A_s(z)$  is the area of the corresponding sediment column at depth  $z$ . To ensure a mass balance,  
 498 the volumetric rate of  $O_2$  consumption due to aerobic metabolism in water can then be calculated  
 499 as follows:

$$500 \quad OF_{w,Aer}(z) = OF_{Aer} - \widetilde{OF_{s,Aer}}(z) \frac{1}{A(z)dz} \quad (30)$$

501 where  $A(z)dz$  is the volume of the water layer connected to the corresponding sediment column, and  
 502 it is used here to convert the sedimentary  $O_2$  consumption into a volumetric rate in the water column.  
 503 Furthermore, following Martin *et al.* (1987), Carlson *et al.* (1994) and Arístegui *et al.* (2003), we  
 504 redistribute the respiration ( $OF_{w,Aer}$ ) within the water column, assuming that 80% of the respiration  
 505 occurs in the photic zone, with the remaining 20%, sustained by the export production, occurs in the  
 506 deeper water layers where it can further degrade.

### 507 2.2.3 Boundary conditions for the transport module

508 The partial differential equations (18) and (23) require boundary conditions to constrain the  
 509 diffusive transport (i.e., the first term on the right-hand side of both equations). At the sediment-

water interface, a zero-flux boundary condition is imposed, because the diffusive exchanges of CH<sub>4</sub> and O<sub>2</sub> between the sediment columns and the overlying waters are already included as source/sink terms in Eq. (18) and (23). This choice was guided by the valley-shape configuration of our lake set-up, and thus by the presence of diffusive CH<sub>4</sub> and O<sub>2</sub> exchange fluxes with sediment in each water layer of our model, a situation in stark contrast from a bucket shape model where only a single sediment column would be connected to the bottom water layer.

At the lake surface ( $z = 0$  m), the boundary conditions are determined by the CH<sub>4</sub> and O<sub>2</sub> exchange fluxes with the atmosphere, as given by (Wanninkhof et al., 2009; Cole and Caraco, 1998):

$$F_{\text{atm,CH}_4} = k_{ge}([CH_4] - f_{CH_4,atm} P_{\text{atm}} M_{CH_4} K_{H,CH_4} \exp(\frac{\partial \ln(K_{H,CH_4})}{\partial T} (\frac{1}{T_l} - \frac{1}{298.15}))) \quad (31)$$

$$F_{\text{atm,O}_2} = k_{ge}([O_2] - f_{O_2,atm} P_{\text{atm}} M_{O_2} K_{H,O_2} \exp(\frac{\partial \ln(K_{H,O_2})}{\partial T} (\frac{1}{T_l} - \frac{1}{298.15}))) \quad (32)$$

where  $F_{\text{atm,CH}_4}$  and  $F_{\text{atm,O}_2}$  are diffusive fluxes of CH<sub>4</sub> (g CH<sub>4</sub> m<sup>-2</sup> d<sup>-1</sup>) and O<sub>2</sub> (g O<sub>2</sub> m<sup>-2</sup> d<sup>-1</sup>) through the air-water interface of the lake, respectively.  $f_{CH_4,atm}$  and  $f_{O_2,atm}$  are molar fractions of CH<sub>4</sub> and O<sub>2</sub> in the atmosphere, respectively, and  $P_{\text{atm}}$  is the atmospheric pressure.  $K_{H,CH_4}$  and  $K_{H,O_2}$  are Henry's constants of CH<sub>4</sub> and O<sub>2</sub> at 298.15 K and  $k_{ge}$  is the piston velocity (m s<sup>-1</sup>), here constrained from the empirical equation reported by Cole and Caraco (1998), as in Tan *et al.* (2015; 2018) and Stepanenko *et al.* (2016):

$$k_{ge} = (C_{k1} + C_{k2} v_{a,10}^n) \sqrt{\frac{600}{S_{CX}}} \quad (33)$$

where  $C_{k1}$ ,  $C_{k2}$  and  $n$  are empirical constants (Cole and Caraco, 1998).  $v_{a,10}$  is the absolute wind velocity measured at 10 m above the lake surface (m s<sup>-1</sup>), and  $S_{c,CH_4}$  and  $S_{c,O_2}$  are the Schmidt number of CH<sub>4</sub> and O<sub>2</sub>, respectively (Wanninkhof *et al.* 2009). Note that more ~~recently~~ ~~new~~ recent

formulations of  $k_{ge}$  have been ~~proposed~~ (published in the last decade (Wanninkhof *et al.* 2014; McIntire *et al.*, 2020) but we here choose to use Eq. (33) ~~following~~to be consistent with previous lake modelling studies (Tan *et al.*, 2015; Stepanenko *et al.* 2016; Tan *et al.*, 2018).

### 2.3 Parameter values

Table 1 summarizes all physical and biogeochemical parameters, their values, as well as the original references from which they were extracted. Most of these parameters were either directly taken from relevant modelling studies or constrained based on comprehensive literature reviews. In addition, several key parameters of the FLame ~~model-v1.0~~, highlighted in Table 1, were adjusted by calibrating the model based on observations of lake C fluxes (i.e.,  $F_{PP}$ , diffusive and ebullitive  $CH_4$  emissions). For instance, the parameters  $P_{Chl,max}$  and  $K_{s,P}$  control the lake primary production and were tuned to reproduce broad global patterns of primary production rates across the full range of lake trophic status (Wetzel, 2001). The mineralization  $k_{20}$  and burial constants  $k_{bur}$  were adjusted based on the observed fraction of  $C_{OC,auto}$  that settles onto the lake sediment, either to be decomposed in ~~an aerobic~~anaerobic or oxic conditions or accumulated in the sediment (Hanson *et al.*, 2011, 2014; Maavara *et al.*, 2019; Mendonça *et al.*, 2017). The temperature dependence of mineralization  $\theta$  was fine-tuned to reproduce the observational ranges of temperature dependence of net- $CH_4$  emissions (Aben *et al.*, 2017).  $f_{mm}$  specifies the fraction of mineralization that channels to the methanogenesis pathway, which is adjusted to produce the observational patterns of  $CH_4$  emissions.  $\alpha_{min}$  is the base value of the exponentially decreasing rate of  $CH_4$  production versus sediment depth, and controls the split of  $CH_4$  production between diffusive and ebullitive pathways, which was calibrated to reproduce observed broad trends of  $F_{tot}$ ,  $F_{ebul}$  and  $F_{diff}$  from the literature (Rinta *et al.*, 2017). The parameter values listed in Table 1 provide the reference setup for the simulation of lake  $CH_4$

emissions, and the sensitivity and uncertainty analyses regarding the key model parameters  
(~~listed~~indicated by asterisks in Table 31) is carried out using wide ranges of values covering most  
possible lake conditions from the real world (see section 3.3.3).

## 2.4 Numerical solution

In FLame-v1.0, the physical (i.e., CSLM) and biogeochemical (OC, CH<sub>4</sub> and O<sub>2</sub>) modules are  
coupled online. For the dynamics of volume-integrated OC and CH<sub>4</sub> in sediments, the involved  
ordinary differential equations are solved using a forward Euler scheme. For the dynamics of  
dissolved O<sub>2</sub> and CH<sub>4</sub> concentrations in the water column, the partial differential equations (Eqs.  
(18) and (23)) are solved numerically using an explicit central difference scheme for depth and Euler  
forward scheme for time. The diffusion coefficient  $K_{diff}$  for both O<sub>2</sub> and CH<sub>4</sub> is ~~set as~~ depth-  
dependent (Table 1) to capture the reduced transport when the temperature gradient from the  
epilimnion, metalimnion and hypolimnion is well pronounced (Dong et al. 2020; Imboden and  
Wuest 1995; Imberger 1985; Boehrer and Schultze 2008).

Table 1. Model parameters of FLAME v1.0 and the choice of their values

| Main processes                              | Key model parameters | Physical meanings (units)                                                                                 | Values                 | Ranges                            | Equations | References                       | 插入的单元格 |
|---------------------------------------------|----------------------|-----------------------------------------------------------------------------------------------------------|------------------------|-----------------------------------|-----------|----------------------------------|--------|
| Lake morphology                             | $s$                  | Steepness of lakebed (-)                                                                                  | 2                      | <u>/</u>                          | (1)       | -                                |        |
| Primary production                          | $P_{chl,max}$        | Maximum carbon fixing rate per unit of Chlorophyll-a (mg C (mg Chl-a) <sup>-1</sup> h <sup>-1</sup> )     | 0.5*                   | <u>0.5–6</u>                      | (3)       | Behrenfeld and Falkowski (1997)  |        |
|                                             | $K_{s,P}$            | Half saturation coefficient of total dissolved phosphorus for the primary production (g m <sup>-3</sup> ) | 0.09*                  | <u>0.006–0.18</u>                 | (3)       | Maavara <i>et al.</i> , (2017)   |        |
|                                             | $Q_{10,prod}$        | Temperature sensitivity for the primary production                                                        | 2                      | <u>1.8–2.25</u>                   | (4)       | Lewis (2001) and Reynolds (2006) |        |
|                                             | $k_c$                | Absorbance of PAR per unit of chlorophyll-a (m <sup>2</sup> (g Chl-a) <sup>-1</sup> )                     | 0.014× 10 <sup>3</sup> | <u>(0.01–0.02)×10<sup>3</sup></u> | (5)       | Lewis (2001) and Reynolds (2006) |        |
|                                             | $PP/RP$              | ratio of maximum gross photosynthesis to respiration per unit chlorophyll-a (-)                           | 15                     | <u>/</u>                          | (5)       | Lewis (2001) and Reynolds (2006) |        |
|                                             | $PAR_k$              | PAR at the onset of photo saturation (μmol m <sup>-2</sup> s <sup>-1</sup> )                              | 120                    | <u>90–250</u>                     | (5)       | Lewis (2001) and Reynolds (2006) |        |
|                                             | $K_{dw}$             | PAR attenuations due to pure water ( <u>m<sup>-1</sup></u> )                                              | 0.13                   | <u>0.12–0.20</u>                  | (5)       | Lewis (2001) and Reynolds (2006) |        |
| Mineralization and burial of organic carbon | $K_{dp}$             | PAR attenuations due to suspended particulate matter ( <u>m<sup>-1</sup></u> )                            | 0.06                   | <u>0.05–4</u>                     | (5)       | Lewis (2001) and Reynolds (2006) |        |
|                                             | $k_{20}$             | Mineralization rate at a reference temperature of 20 °C (d <sup>-1</sup> )                                | 0.008*                 | <u>0.003–0.015</u>                | (7)       | Maavara <i>et al.</i> , (2017)   |        |
|                                             | $\theta$             | Temperature dependence of mineralization                                                                  | 1.02*                  | <u>1.01–1.07</u>                  | (7)       | Maavara <i>et al.</i> , (2017)   |        |

|                                                           |                |                                                                                                                        |                                                                                                       |                                   |               |                                               |
|-----------------------------------------------------------|----------------|------------------------------------------------------------------------------------------------------------------------|-------------------------------------------------------------------------------------------------------|-----------------------------------|---------------|-----------------------------------------------|
|                                                           | $k_{bur}$      | Carbon burial rate in the lake (d <sup>-1</sup> )                                                                      | 0.004*                                                                                                | <u>1/2k<sub>20</sub></u>          | (8)           | Mendonca <i>et al.</i> , (2017)               |
|                                                           | $f_{mm}$       | Fraction of mineralization that channels to the methanogenesis pathway                                                 | 1/4*                                                                                                  | <u>1/6–1/2</u>                    | (10) and (27) | Hanson <i>et al.</i> (2014); Bastviken (2009) |
| CH <sub>4</sub> oxidation                                 | $k_{max}$      | Maximal rate of CH <sub>4</sub> oxidation (g CH <sub>4</sub> m <sup>-3</sup> d <sup>-1</sup> )                         | 0.69                                                                                                  | <u>0.19–7.68</u>                  | (19)          | Liikanen <i>et al.</i> (2002)                 |
|                                                           | $Q_{10,ox}$    | Temperature dependence of CH <sub>4</sub> oxidation (-)                                                                | <u>1.2</u>                                                                                            | <u>1.1–2.0</u>                    | (19)          | Liikanen <i>et al.</i> (2002)                 |
|                                                           | $K_{s,CH4}$    | Half-saturation constant for CH <sub>4</sub> (g CH <sub>4</sub> m <sup>-3</sup> )                                      | 0.6                                                                                                   | <u>/</u>                          | (19)          | Stepanen <i>et al.</i> (2016)                 |
|                                                           | $K_{s,O2}$     | Half-saturation constant for O <sub>2</sub> (g O <sub>2</sub> m <sup>-3</sup> )                                        | 0.67                                                                                                  | <u>/</u>                          | (19)          | Liikanen <i>et al.</i> (2002)                 |
| Shape parameter of sedimentary CH <sub>4</sub> production | $\alpha_{min}$ | Base value of the exponentially decreasing rate of CH <sub>4</sub> production versus sediment depth (m <sup>-1</sup> ) | 10*                                                                                                   | <u>10–70</u>                      | (12)          | Langenegger <i>et al.</i> , (2019)            |
| Gas transport in the water column and exchange with air   | $K_{diff}$     | Depth-dependent eddy-diffusion coefficient (m <sup>2</sup> d <sup>-1</sup> )                                           | 8.64 (epilimnion), 8.64× 10 <sup>-3</sup> at the thermocline, and 8.64×10 <sup>-1</sup> (hypolimnion) | <u>8.64×10<sup>-2</sup>–1.728</u> | (18) and (23) | Stefan and Fang (1994)                        |
|                                                           | $C_{kl}$       | Empirical constant for piston velocity (m s <sup>-1</sup> )                                                            | 5.75×10 <sup>-6</sup>                                                                                 | <u>/</u>                          | (33)          | Cole and Caraco, (1998)                       |
|                                                           | $C_{k2}$       | Empirical constant for piston velocity (m s <sup>-1</sup> )                                                            | 5.97×10 <sup>-7</sup>                                                                                 | <u>/</u>                          | (33)          | Cole and Caraco, (1998)                       |
|                                                           | $n$            | Empirical constant for piston velocity                                                                                 | 1.7                                                                                                   | <u>/</u>                          | (33)          | Cole and Caraco, (1998)                       |
|                                                           | $S_{c,CH4}$    | Schmidt number of CH <sub>4</sub> (-)                                                                                  | 677                                                                                                   | <u>/</u>                          | (33)          | Wanninkhof <i>et al.</i> (2009)               |



|  |                |                                                   |                        |   |      |                                    |
|--|----------------|---------------------------------------------------|------------------------|---|------|------------------------------------|
|  | $S_{c,O_2}$    | Schmidt number of O <sub>2</sub> (-)              | 589                    | / | (33) | Wanninkhof<br><i>et al.</i> (2009) |
|  | $f_{CH_4,atm}$ | Atmospheric molar fractions<br>of CH <sub>4</sub> | $0.18 \times 10^{-13}$ | / | (31) | Lan <i>et al.</i><br>(2024)        |
|  | $f_{O_2,atm}$  | Atmospheric molar fractions<br>of O <sub>2</sub>  | 0.2095                 | / | (32) | Gatley <i>et al.</i><br>(2008)     |

566

567

568

\* indicates that the original parameter values are from the literature, and further adjusted by calibration versus observations. Moreover, their values are varied for the sensitivity analysis in section 3.3.3.

/ indicates that the ranges of the parameter values are not reported.

## 569 2.5 Case studies

570 We implemented three case studies to assess the performance of FLaMe-[v1.0](#) in simulating lake  
571 CH<sub>4</sub> emissions, as well as its application to the European scale. First, we present theoretical  
572 simulations for two representative cases (methodological details in section 2.5.1) to assess the general  
573 behaviors of FLaMe-[v1.0](#) in capturing the physical-biogeochemical patterns of contrasted lakes. Then,  
574 we perform the simulations for four well-surveyed real lakes to assess the model's capability in  
575 capturing the observed temporal variations of CH<sub>4</sub> fluxes (section 2.5.2). Next, we apply FLaMe-[v1.0](#)  
576 to the entire European domain to assess the model's capability in reproducing the spatial patterns and  
577 seasonal variations of CH<sub>4</sub> fluxes at continental scale (section 2.5.3). The European scale application  
578 can be considered as a “proof of concept” in support of our proposed modeling strategy. Finally, we  
579 examine the sensitivity to key model parameters and assess the uncertainty of the continental-scale  
580 emissions using the samples produced by sensitivity analysis, combined with a machine learning  
581 approach (section 2.5.4).

### 582 2.5.1 Two theoretical representative lakes for testing FLaMe-[v1.0](#) performance

583 To test if the FLaMe-~~model~~-[v1.0](#) can capture the contrast [patterns](#) in physical-biogeochemical  
584 behaviors across shallow vs. deep, eutrophic vs. oligotrophic and warm vs. cold lakes, we set-up the  
585 model for two theoretical representative lakes: a “deep oligotrophic” lake ( $h_{max} = 35$  m or  $h_{mean} = 17.5$   
586 m and  $[TP] = 3 \mu\text{g P L}^{-1}$ ) driven by a “cold” climate ( $63.75^\circ\text{N}$ ,  $26.25^\circ\text{E}$ ; Fig. S1) and a “shallow  
587 eutrophic” lake ( $h_{max} = 10$  m or  $h_{mean} = 5$  m and  $[TP] = 80 \mu\text{g P L}^{-1}$ ) driven by a “warm” climate  
588 ( $43.75^\circ\text{N}$ ,  $-6.25^\circ\text{E}$ ; Fig. S2). [The lake areas of these two theoretical lakes were set as 5 km<sup>2</sup>, which](#)  
589 [was tested to have limited effects on the simulation results.](#) For these two theoretical representative  
590 cases, FLaMe-[v1.0](#) simulates the spatio-temporal evolutions of physical and biogeochemical

591 variables and fluxes, including primary production and mineralization fluxes, and labile  
592 autochthonous OC stocks as well as the vertically resolved gradients of temperature, CH<sub>4</sub> and O<sub>2</sub>  
593 concentrations. Furthermore, we also compared the seasonal patterns of CH<sub>4</sub> productions and  
594 emissions for these two ~~contrast~~contrasting lakes. To investigate further how environmental factors  
595 affect the ~~FLaMe~~ model behavior, we further decompose the collective responses of shallow and deep  
596 lakes into individual effects induced by trophic level, climate (Fig. S1–S3) and lake depth using  
597 hypothetical numerical simulations, i.e., (i) changing the maximal lake depth ( $h_{max}$ ) from 5 to 25 m;  
598 (ii) increasing the [TP] levels from 8 to 80  $\mu\text{g P L}^{-1}$ ; and (iii) changing the climate from warm  
599 (43.75°N, -6.25°E; Fig. S1) to cold conditions (63.75°N, 26.25°E; Fig. S2).

## 600 2.5.2 Simulations of temporal patterns for four well-surveyed lakes

601 To evaluate the ability of FLaMe-v1.0 to reproduce the observed temporal patterns of CH<sub>4</sub> fluxes,  
602 we selected four lakes from the Inter-Sectoral Impact Model Intercomparison Project (ISIMIP) lake  
603 datasets for which monthly resolved temporal CH<sub>4</sub> fluxes were available: ~~(Tan et al., 2024)~~. These  
604 lakes cover different lake depths, areas, climate conditions and trophic statuses, as summarized in  
605 Table 2. Since *in-situ* measurements of climatic drivers are not available for these lakes, we extracted  
606 them from the 0.5°x0.5° GSWP3-W5E5 global climate forcings released by the ISIMIP3a project as  
607 an approximation. The measurements of CH<sub>4</sub> fluxes for these lakes were mostly collected during the  
608 first 20 years of the 21<sup>st</sup> century, and we thus selected the climate forcings for the period 1991–2019,  
609 using the period 1991–1999 as spin-up phase. Since the lack of ~~concomitant in-situ measured~~  
610 ~~measurements of~~ climatic drivers, ~~as well as observations of~~ and variations in lake water levels ~~and~~  
611 ~~areas~~, affect the model's ability to capture the full variability in the time-series of observed CH<sub>4</sub>  
612 emission time series, we here focus only your evaluation on the magnitudes and broad seasonal patterns

in observed CH<sub>4</sub> emissions, [following what can be achieved for regional and global scale applications](#).  
 Thus, we evaluated the simulated statistics (mean and SD represented by boxplots) of CH<sub>4</sub> fluxes  
~~within~~ [over](#) the [yearannual cycle](#) against the observational data.

**Table 2. Characteristic information for the four well-surveyed lakes from ISIMIP datasets**

| Lake                | Coordinates         | Lake depth                     | Lake area<br>(km <sup>2</sup> ) | Climate              | Trophic status | <a href="#">DataTemporal coverage</a> | <a href="#">Spatio-temporal resolution</a> |
|---------------------|---------------------|--------------------------------|---------------------------------|----------------------|----------------|---------------------------------------|--------------------------------------------|
| <b>Klöntal</b>      | 47.026N,<br>8.981E  | 21.4m (mean),<br>45m (max)     | 2.25                            | Temperate            | Oligotrophic   | Annual mean                           | <a href="#">Site; monthly</a>              |
| <b>Erssjön</b>      | 58.371N,<br>12.162E | 1.3m<br>(mean), 4.75m<br>(max) | 0.062                           | Temperate-<br>Boreal | Mesotrophic    | 2012–2013                             | <a href="#">Site; bi-weekly</a>            |
| <b>Upper Mystic</b> | 42.434N,<br>71.150W | 11.7m (mean),<br>25m (max)     | 0.58                            | Temperate            | Eutrophic      | 2007–2008                             | <a href="#">Site; weekly</a>               |
| <b>Villasjön</b>    | 68.35N,<br>19.03E   | 1.3 m (max)                    | 0.17                            | Boreal               | Oligotrophic   | 2010–2017                             | <a href="#">Site; daily</a>                |

插入的单元格

### 2.5.3 Implementation of [FLaMe-v1.0](#) at continental scale

To implement the model at the scale of Europe (25°W–60°E, 36°–71°N), we extracted the  
[natural](#) lakes ([type I](#)) within this domain from the HydroLAKES database (Messenger *et al.*, 2016;  
 n=108407, total area = 1.33x10<sup>5</sup> km<sup>2</sup> for lakes with 0.1≤*A*<sub>0</sub>≤1000 km<sup>2</sup> within the European domain).  
 Following our clustering strategy, we subdivided, within each grid cell, all lakes into four classes  
 based on their surface area (0.1 < *A*<sub>0</sub> < 1 km<sup>2</sup>, 1 < *A*<sub>0</sub> < 10 km<sup>2</sup>, 10 < *A*<sub>0</sub> < 100 km<sup>2</sup>, and 100 < *A*<sub>0</sub> < 1000  
 km<sup>2</sup>). As [FLaMe-v1.0](#) was derived from the small lake physics model CSLM, we here only  
 considered the lakes with an area smaller than 1000 km<sup>2</sup>, and excluded the very large lakes (*A*<sub>0</sub> > 1000

627 km<sup>2</sup>) that account for 40% of the total European lake surface area (but only consist of 21 lakes).  
628 Within our model domain, we have 108407 lakes with a surface area larger than 0.1 km<sup>2</sup>, which at  
629 spatial resolution of 2.5 degree (Fig. S4–S5) result in 365 grid cells and 953 representative lakes  
630 (hence reducing computation cost by more than a factor of 100 compared to a case where each  
631 individual lake would be simulated). By parallelizing the model simulations on a high-performance  
632 cluster, the implementation of FLaMe-[v1.0](#) for the entire European domain consumes approximately  
633 365 CPU hours for a single run covering 10 years.

634 The FLaMe-~~model-v1.0~~ was forced by meteorological conditions from the GSWP3-W5E5  
635 reanalysis product under ISIMIP3a (Frieler *et al.*, 2024) (Fig. S6), including shortwave solar  
636 radiation (W m<sup>-2</sup>), longwave solar radiation (W m<sup>-2</sup>), precipitation (mm s<sup>-1</sup>), near surface air  
637 temperature (at 10 m height, °C), specific humidity (kg kg<sup>-1</sup>), near surface wind velocity (at 10m, m  
638 s<sup>-1</sup>), and atmospheric pressure (Pa). As these forcings were provided at a finer spatial resolution of  
639 0.5°, we only applied the values in the central 0.5° grid cell of our larger 2.5° grid. In addition, the  
640 FLaMe-~~model-v1.0~~ was also driven by the [TDPTP](#) in the representative lakes (Fig. S7–S8), which  
641 was estimated by dividing the [TDPTP](#) mass outflow by the water discharge reported in  
642 HydroLAKES, hence assuming that the lake water is well mixed. The TP mass outflow from each  
643 lake in HydroLAKES was obtained by routing the TP loads (extracted from the GlobalNEWS model;  
644 Mayorga *et al.*, (2010)) from the watershed (point and non-point terrestrial sources) into the river  
645 network, following the procedure outlined in Lauerwald *et al.* (2019) and topological information  
646 provided by the HydroSHEDS drainage network. More details related to the TP routing can be found  
647 in Bouwman and Billen (2009), Van Drecht *et al.* (2009), and Mayorga *et al.* (2010).

648 To validate the FLame-v1.0 for European lakes, we will evaluate the simulated  $F_{PP}$  and  $CH_4$   
649 emission rates against the ranges/values reported in the literature and/or from observations. First,  
650 the simulated  $F_{PP}$  will be evaluated against empirical ranges reported by Wetzell (2001) for lakes  
651 from ultraoligotrophic (0–5  $\mu\text{gP L}^{-1}$ ), oligotrophic (5–10  $\mu\text{gP L}^{-1}$ ), mesotrophic (10–30  $\mu\text{gP L}^{-1}$ ), to  
652 eutrophic ( $>30 \mu\text{gP L}^{-1}$ ) conditions. Next, the simulated diffusive and ebullitive  $CH_4$  emission rates  
653 will be evaluated against *in-situ* measurements compiled by Rinta et al. (2017) from 17 boreal lakes  
654 (in southern Finland and Sweden) and 30 central European lakes (in The Netherlands, Germany and  
655 Switzerland). This dataset is adopted because it can not only differentiate the ebullitive and diffusive  
656  $CH_4$  fluxes during late summer (August and September, 2010–2011) but also provides information  
657 regarding environmental conditions of the study area (mean annual air temperature, annual  
658 precipitation, percentage of forests and managed land in the catchment) and water chemistry of the  
659 studied lakes (temperature, conductivity, pH, absorbance, TP and TN in surface water, and average  
660 TP and TN in the water column), which are helpful for understanding the lake methane dynamics  
661 within these two contrasted regions. However, this dataset of 47 lakes still has some important  
662 limitations, in particular as it presents only summer-time observations, and not time-series which  
663 would comprise the full seasonal cycle including turnover events and other hot moments. In addition,  
664 it contains potential biases induced by the calculation methods used for separating the measured  
665  $CH_4$  fluxes into diffusive and ebullitive pathways. In particular, Rinta et al. (2017) used floating  
666 chambers over a relatively short duration (6hr), which might not be able to detect sporadic ebullition  
667 events, and did not employ bubble traps to estimate the ebullitive flux.

#### 668 2.5.4 Sensitivity and uncertainty analysis

669 To explore how model parameterization affects the European-scale assessments of lake CH<sub>4</sub>  
670 emissions, we conducted a sensitivity analysis encompassing the parameters whose variations  
671 induce the largest changes in lake CH<sub>4</sub> dynamics ~~and listed~~(with the involved parameters indicated  
672 ~~by asterisks~~ in Table 3-1). The sensitivity was conducted by varying a parameter once at a time: only  
673 one parameter is varied with the other parameters kept unchanged. All these parameters were  
674 assumed to have Gaussian distributions, with their SDs specified as 50% of their original values,  
675 except the temperature dependency  $Q_{10,ox}$  and  $\theta$  whose SDs were specified as 50% of their deviation  
676 to unity. More specifically, we tested the sensitivity within the ranges of mean $\pm$ SD at four points,  
677 i.e., +SD, +0.5SD, -0.5SD, and -SD.

678 To constrain uncertainties in European scale CH<sub>4</sub> emissions, we complemented the sensitivity  
679 analysis (n=36) with another 28 scenarios under several extreme cases and different combinations  
680 of variations in key parameters. With these 64 assessments taken as samples, we then used a machine  
681 learning approach to assess the uncertainty associated ~~to~~with our estimation of European lake CH<sub>4</sub>  
682 fluxes. Specifically, we trained a Random Forest (RF) model that capture nonlinear relationships  
683 between our key model parameters and European lake CH<sub>4</sub> emissions, i.e., the key parameters are  
684 taken as predictors and the European lake CH<sub>4</sub> emissions are taken as target variable. Next, we  
685 produced 1000 Gaussian-distributed random samples within the parameter space and estimated an  
686 ensemble of CH<sub>4</sub> emissions using the trained RF model.

Table 3 Key model parameters selected for sensitivity and uncertainty analysis

| Main processes                              | Key model parameters | Physical meanings (units)                                                                                  | Values | Ranges      | Eq.       | References                                    |
|---------------------------------------------|----------------------|------------------------------------------------------------------------------------------------------------|--------|-------------|-----------|-----------------------------------------------|
| Primary production                          | $P_{chl,max}$        | Maximum carbon fixing rate per unit of Chlorophyll-a ( $\text{mg C (mg Chl-a)}^{-1}\text{h}^{-1}$ )        | 0.5    | 0.5–6       | (3)       | Behrenfeld and Falkowski (1997)               |
|                                             | $K_{s,p}$            | Half saturation coefficient of total dissolved phosphorus for the primary production ( $\text{g m}^{-3}$ ) | 0.09   | 0.006–0.189 | (3)       | Maavara <i>et al.</i> , (2017)                |
| Mineralization and burial of organic carbon | $k_{20}$             | Mineralization rate at a reference temperature of 20 °C ( $\text{d}^{-1}$ )                                | 0.008  | 0.003–0.015 | (7)       | Maavara <i>et al.</i> , (2017)                |
|                                             | $\theta$             | Temperature dependence of mineralization                                                                   | 1.02   | 1.01–1.07   | (7)       | Maavara <i>et al.</i> , (2017)                |
|                                             | $k_{bur}$            | Carbon burial rate in the lake ( $\text{d}^{-1}$ )                                                         | 0.004  | $1/2k_{20}$ | (8)       | Mendonça <i>et al.</i> , (2017)               |
|                                             | $f_{mm}$             | Fraction of mineralization that channels to the methanogenesis pathway                                     | 1/4    | 1/6–1/2     | (10) (26) | Hanson <i>et al.</i> (2014); Bastviken (2009) |
| CH <sub>4</sub> oxidation                   | $k_{max}$            | Maximal rate of CH <sub>4</sub> oxidation ( $\text{g CH}_4\text{m}^{-3}\text{d}^{-1}$ )                    | 0.69   | 0.19–7.68   | (18)      | Liikanen <i>et al.</i> (2002)                 |
|                                             | $\theta_{0,ox}$      | Temperature dependence of CH <sub>4</sub> oxidation (–)                                                    | 1.2    | 1.1–2.0     | (18)      | Liikanen <i>et al.</i> (2002)                 |
| Base value of the shape parameter           | $\alpha_{min}$       | Exponentially decreasing rate of CH <sub>4</sub> production versus sediment depth ( $\text{m}^{-1}$ )      | 10     | 10–70       | (12)      | Langenegger <i>et al.</i> , (2019)            |



689

### 690 3. Results

#### 691 3.1 Assessing the performance of FLaMe-v1.0 in capturing patterns of CH<sub>4</sub> dynamics across 692 different lake types

693 The FLaMe-model-v1.0 is shown to be able to well capture the typically observed, contrasting  
694 physical and biogeochemical behaviors for two representative cases (Fig. 5 and Fig. S9–17; more  
695 details in Supplementary Text S3): shallow vs. deep, eutrophic vs. oligotrophic and warm vs. cold  
696 lakes. In the deep oligotrophic lake, the mean temperature reveals a lower and narrower seasonal  
697 variability ( $\sim 3\text{--}8^\circ\text{C}$ ) compared to the shallow eutrophic lake ( $5\text{--}15^\circ\text{C}$ ) (Fig. 5a vs. 5b). Large  
698 temperature variations in the latter are mainly driven by the smaller water volume and thus faster  
699 mean temperature response to fluctuations in atmospheric temperature. In addition, the annual  
700 averaged  $F_{PP}$  in the shallow eutrophic lake ( $490\text{ gC m}^{-2}\text{ yr}^{-1}$ ) is approximately 38 times higher than  
701 that in the deep oligotrophic lake ( $13\text{ gC m}^{-2}\text{ yr}^{-1}$ ) (Fig. 5c vs. 5d). This difference can be explained  
702 by the differences in water volume (energy exchange), trophic status, and climate forcings. The higher  
703  $F_{PP}$  of the shallow eutrophic lake also translates into higher  $C_{OC,auto}$  concentration ( $\sim 110$  times) which  
704 persist over longer periods (Fig. 5e vs. 5f), despite substantially higher  $F_{min}$  rates.

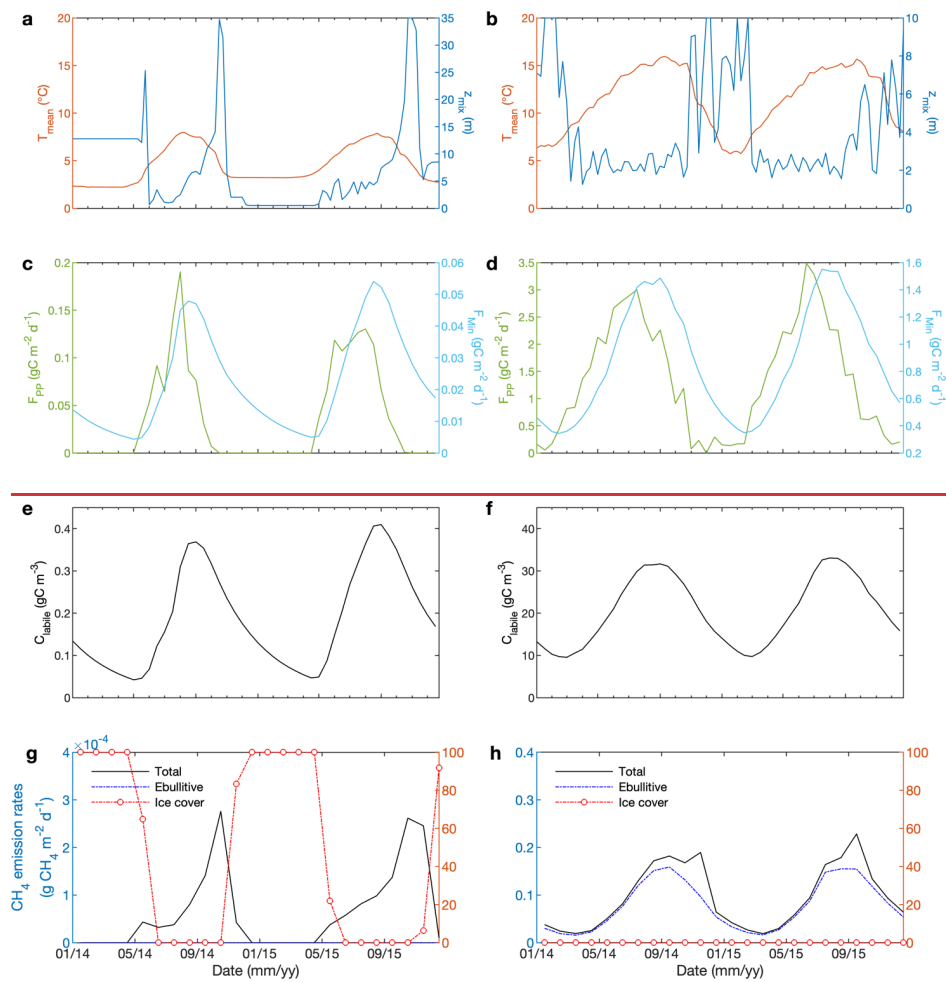

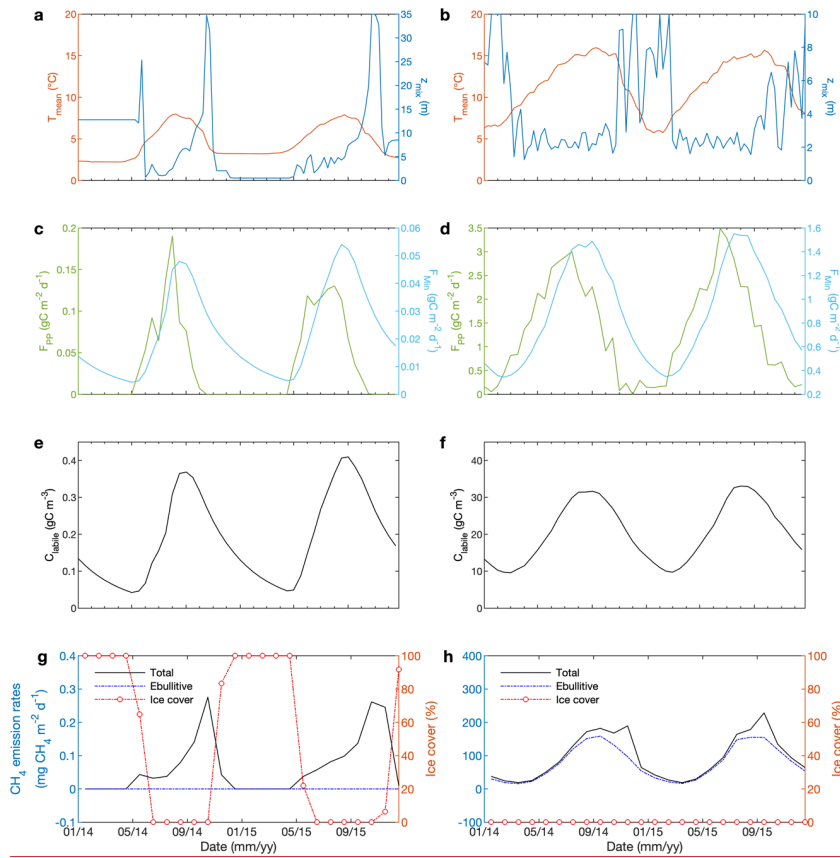

Fig. 5. Depth-integrated temporal evolution of variables and processes in two theoretical representative lakes. The deep oligotrophic lake (left) has a maximal depth of 35 m and  $[TDP_{TP}]$  of  $3 \mu\text{gP L}^{-1}$ , and is driven by the climate forcings at the location of  $63.75^{\circ}\text{N}$ ,  $26.25^{\circ}\text{E}$ . The shallow eutrophic lake (right) has a maximal depth of 10 m and  $[TDP_{TP}]$  of  $80 \mu\text{gP L}^{-1}$ , and is driven by the climate forcings at the location  $43.75^{\circ}\text{N}$ ,  $-6.25^{\circ}\text{E}$ . (a) and (b) show the evolution of lake mean temperature and mixing depth; (c) and (d) show the evolution of primary production ( $F_{PP}$ ) and mineralization rate ( $F_{Min}$ ); (e) and (f) show the evolution of concentration of

713 autochthonous organic carbon ( $C_{OC,auto}$ ); (g) and (h) show the evolution of  $CH_4$  emission rates and ice cover.  
714 Note the difference scales between the left and right panels.

715 In the deep oligotrophic lake, the simulated vertical temperature profiles indicate an almost  
716 permanently maintained stratification that is only interrupted by short but intense turnover events  
717 during late falls (Fig. S9a). Lake stratification (e.g., lake turnover and  $O_2$  concentrations that depend  
718 mostly on solubility and hence, temperature) dominates the spatio-temporal pattern of  $O_2$  such that  
719  $O_2$  concentration is near-saturated during most of the year (Fig. S9c). The oligotrophic status, together  
720 with the well oxygenated conditions, results in extremely low  $CH_4$  concentrations. Higher  $CH_4$   
721 concentrations are only simulated near the lake bottom following the productive season, i.e., late  
722 summer/fall transition (Fig. S9e). In contrast, in the shallow eutrophic lake, the weaker stratification  
723 results in a less pronounced vertical temperature gradient (Fig. S9b). The vertical lake  $O_2$  profile is  
724 not only controlled by the lake physics (temperature and  $O_2$  solubility) but also by intense  
725 biogeochemical processes (Fig. S9d). During summer,  $O_2$  concentrations in the upper portion of the  
726 lake are slightly supersaturated due to photosynthetic activity, followed by a gradual decrease in  $O_2$   
727 concentration as mineralization rates exceed primary production rates. Due to the high primary  
728 production in the eutrophic lake, large amounts of OC are exported below the thermocline, where  
729 heterotrophic activity progressively depletes  $O_2$ , leading to the development of anoxic conditions in  
730 the hypolimnion. The combination of high  $F_{Min}$  and low  $O_2$  concentrations drive the accumulation of  
731  $CH_4$  in late summer at the bottom of the lake (Fig. S9f), with maximal  $CH_4$  concentration ( $3.0 \text{ g } CH_4$   
732  $\text{m}^{-3}$ ) exceeding those simulated in the deep oligotrophic lake by a factor of 600 (Fig. S9e).

733 By aggregating CH<sub>4</sub> fluxes over time, we obtained distinct seasonal patterns of CH<sub>4</sub> production  
 734 and emission for these two representative lakes (Fig. 5g and 5h; Fig. S10). In the cold, deep  
 735 oligotrophic lake (Fig. 5g and Fig. S10a), winter to early spring ice cover (December–April) blocks  
 736 CH<sub>4</sub> emissions such that lake CH<sub>4</sub> emissions are limited to the period between May and November.  
 737 CH<sub>4</sub> production is highest (~~0.8×10<sup>-4</sup> g~~ mg CH<sub>4</sub> m<sup>-2</sup> d<sup>-1</sup>) in August and lowest (~~8.0×10<sup>-5</sup> g~~ 0.08 mg  
 738 CH<sub>4</sub> m<sup>-2</sup> d<sup>-1</sup>) in April. Almost all the produced CH<sub>4</sub> escapes the sediment via diffusion as gas bubbles  
 739 do not form due to low CH<sub>4</sub> production rates and high-water pressure. However, the benthic CH<sub>4</sub> flux  
 740 is subsequently largely oxidized in the well oxygenated deep water column. As a result, total lake  
 741 CH<sub>4</sub> emissions are low (0 to ~~2.4×10<sup>-4</sup> g~~ 0.24 mg CH<sub>4</sub> m<sup>-2</sup> d<sup>-1</sup>) with a slight peak in October. In the  
 742 shallow eutrophic lake (Fig. 5h and Fig. S10b), the warmer climate prevents ice formation on the lake  
 743 surface, leading to an emission season about twice as long as under colder climatic conditions. CH<sub>4</sub>  
 744 production (~~0.0220~~ to ~~0.35 g~~ 350 mg CH<sub>4</sub> m<sup>-2</sup> d<sup>-1</sup>) is >1000 times higher than that in cold, deep  
 745 oligotrophic lake due to the higher nutrient loads, lower O<sub>2</sub> levels, higher irradiance as well as higher  
 746 temperature (Fig. 5b). Higher CH<sub>4</sub> production rates, together with lower water pressure, drive the  
 747 formation of gas bubbles, leading to a higher fraction of CH<sub>4</sub> emissions via the ebullitive pathway.  
 748 The weaker stratification and the shorter transport time scale in the shallow lake limits CH<sub>4</sub> oxidation  
 749 during diffusive transport, leading to ~900 times higher total CH<sub>4</sub> emissions compared to the deep,  
 750 oligotrophic lake. Total lake CH<sub>4</sub> emissions are highest (~~0.21 g~~ 210 mg CH<sub>4</sub> m<sup>-2</sup> d<sup>-1</sup>) in September and  
 751 lowest (~~0.02 g~~ 20 mg CH<sub>4</sub> m<sup>-2</sup> d<sup>-1</sup>) in February.

752 By decomposing the collective responses of shallow and deep lakes into individual effects  
 753 induced by trophic level, climate and lake depth using additional theoretical numerical simulations,  
 754 we found that the trophic level exerts the most important control on CH<sub>4</sub> dynamics, followed by

755 climate, and finally, lake depth (Fig. S11–S14). Specifically, the yearly mean CH<sub>4</sub> production is  
756 increased by a factor of 30 (from ~~0.0033~~ to ~~0.089~~ **g89 mg** CH<sub>4</sub> m<sup>-2</sup> d<sup>-1</sup>), and the yearly mean CH<sub>4</sub>  
757 emission is increased by a factor of 44 (from ~~0.00131.3~~ to ~~0.057~~ **g57 mg** CH<sub>4</sub> m<sup>-2</sup> d<sup>-1</sup>) from  
758 oligotrophic to ~~trophie~~**eutrophic** status (i.e., [TDP] increased by 10 times) (Fig. S12). From cold to  
759 warm climate, the yearly mean CH<sub>4</sub> production and emission increase by a factor of 6 (~~0.00949.4~~ to  
760 ~~0.059~~ **g59 mg** CH<sub>4</sub> m<sup>-2</sup> d<sup>-1</sup>) (Fig. S13), and a factor of 5 (~~0.00575.7~~ to ~~0.0330~~ **g** CH<sub>4</sub> m<sup>-2</sup> d<sup>-1</sup>),  
761 respectively. By increasing lake depth from 15 m to 35 m (Fig. S14), the CH<sub>4</sub> production rates remain  
762 almost the same, i.e., ~~0.02~~ **g20 mg** CH<sub>4</sub> m<sup>-2</sup> d<sup>-1</sup> for the yearly mean and ~~0.06~~ **g60 mg** CH<sub>4</sub> m<sup>-2</sup> d<sup>-1</sup> for  
763 the peak, while the CH<sub>4</sub> emissions are overall lower (~~35 to 22 mg CH<sub>4</sub> m<sup>-2</sup> d<sup>-1</sup> for the peak without~~  
764 ~~considering the storage flux~~) for the deeper lake.

### 765 3.2 Evaluation of simulated temporal lake CH<sub>4</sub> emissions against observations from four well- 766 surveyed lakes

767 In Klöntal and Erssjön Lakes (Table 2, Fig. 6a and 6b), FLaMe-~~v1.0~~ captures the observed  
768 seasonal cycles of CH<sub>4</sub> emissions well, albeit with almost a one-month delay. As a result, the  
769 simulated CH<sub>4</sub> fluxes are slightly lower in the first half of the year and slightly higher in the second  
770 half. This lag between observations and model results is likely due to the use of idealized climate  
771 forcings but could also be attributed to the unresolved changes in water levels and in-lake TDP  
772 dynamics. In the Klöntal Lake (Fig. 6a), the observed CH<sub>4</sub> fluxes are exceptionally high in April (1.64  
773 ~~gmg~~ CH<sub>4</sub> m<sup>-2</sup> d<sup>-1</sup>) and July (5.03 ~~gmg~~ CH<sub>4</sub> m<sup>-2</sup> d<sup>-1</sup>), interrupting the normal seasonal cycles. These  
774 abrupt observed emissions might reflect the contributions from storage fluxes that are not well  
775 captured by FLaMe-~~v1.0~~. Apart from these two months with exceptionally high fluxes, the  
776 observational data indicates peak emissions of 3.18 ~~gmg~~ CH<sub>4</sub> m<sup>-2</sup> d<sup>-1</sup> in August and no emissions

777 during the ice-covered period. FLAME-v1.0 simulates similar fluxes, with a peak of 3.4  $\text{gmg CH}_4 \text{ m}^{-2} \text{ d}^{-1}$  in September (and 3.17  $\text{gmg CH}_4 \text{ m}^{-2} \text{ d}^{-1}$  in August), and a null flux in January–February when  
 778 the model predicts ice formation. In the Erssjön Lake (Fig. 6b), observational data report a peak in  
 779  $\text{CH}_4$  emission reaching 13.48  $\text{gmg CH}_4 \text{ m}^{-2} \text{ d}^{-1}$  in July and no emissions during the ice-covered period,  
 780 whereas FLAME-v1.0 simulates a peak emission of 18.76  $\text{gmg CH}_4 \text{ m}^{-2} \text{ d}^{-1}$  in August (and 12.82  $\text{gmg}$   
 781  $\text{CH}_4 \text{ m}^{-2} \text{ d}^{-1}$  in July), and no flux in February. Moreover, the simulated  $\text{CH}_4$  fluxes are exceptionally  
 782 high in April (11.10  $\text{gmg CH}_4 \text{ m}^{-2} \text{ d}^{-1}$ ) due to the release of a storage fluxes that does not seem to be  
 783 recorded by the observations. These high  $\text{CH}_4$  fluxes attributed to storage and lake turnover are  
 784 usually associated with large variability, i.e., in Klöntal Lake (Fig. 6a), the observed variability  
 785 (standard deviation, SD) in  $\text{CH}_4$  flux in July is almost 8-fold larger than the simulated one, whereas  
 786 in Erssjön Lake (Fig. 6b), the simulated SD in  $\text{CH}_4$  flux in April is almost 6-fold larger than that of  
 787 the observed one. This suggests that both *in-situ* measurements and FLAME-v1.0 struggle to  
 788 accurately capture the storage fluxes. Apart from these storage fluxes, we found that the SDs of  $\text{CH}_4$   
 789 fluxes simulated by FLAME-v1.0 are lower than those observed for most months, indicating a more  
 790 stable behavior in the simulations compared to the observations across the multi-year period  
 791 considered here.

793 For the Upper Mystic and Villasjön Lakes (Fig. 6c and 6d), the observed temporal patterns of  
 794  $\text{CH}_4$  fluxes appear more erratic, either due to the dominant role of short-term water level fluctuations  
 795 or due to the complex ice cover dynamics. For the Upper Mystic Lake (Fig. 6c), the observed  $\text{CH}_4$   
 796 fluxes are irregular or fluctuating (0–17.6  $\text{gmg CH}_4 \text{ m}^{-2} \text{ d}^{-1}$ ) over the year, a pattern which was  
 797 explained by dynamic variations of lake water levels (Varadharajan, 2009). Since *in-situ* water level  
 798 measurements are lacking and the lake area and depth are set as constant in the model, the simulated

799 temporal variations cannot capture these observed erratic patterns well. Our model produces a  
800 smoother seasonal cycle of monthly-mean CH<sub>4</sub> fluxes over the year, i.e., high fluxes (10.02–13.38  
801 [gmg](#) CH<sub>4</sub> m<sup>-2</sup> d<sup>-1</sup>) during the productive season (August–October), and low fluxes (0.02–7.56 [gmg](#)  
802 CH<sub>4</sub> m<sup>-2</sup> d<sup>-1</sup>) during the other months. Moreover, the model predicts a weak storage flux occurring in  
803 November (10.20 [gmg](#) CH<sub>4</sub> m<sup>-2</sup> d<sup>-1</sup>). For the Villasjön Lake (Fig. 6d), the observed CH<sub>4</sub> fluxes are  
804 limited to the period of June–October, due to the long ice cover period induced by the cold climate.  
805 FLAME-[v1.0](#) captures the observed ice-cover period well and produces similar seasonal cycles of CH<sub>4</sub>  
806 fluxes. The simulated means and SDs are very close to observations in June and July, but both, means  
807 and SDs, are much lower than observations in August, September, and October.

808 In summary, despite the use of idealized climatic forcing and neglecting variations in lake area  
809 and water level, FLAME-[v1.0](#) broadly captures the observed temporal patterns of monthly mean  
810 emissions, albeit sometimes with small delays or diverging extents of high emissions periods. The  
811 SDs of simulated CH<sub>4</sub> fluxes are also usually lower than the observed values, which is to be expected  
812 considering that our model is not designed to capture high-frequency fluctuations of CH<sub>4</sub> fluxes. The  
813 largest biases can be found in the estimations of storage fluxes (timing and magnitude), probably due  
814 to 1) the difficulty of capturing these fluxes with existing measurement instruments and techniques,  
815 2) the possibility of methane oxidation with greater than expected values during turnover and ice-out  
816 (Mayr *et al.*, 2020; Zimmermann *et al.*, 2019; Pajala *et al.*, 2022) and 3) the lack of *in-situ*  
817 measurements of climate conditions, dynamical water levels, and dynamic TDP concentrations  
818 (Denfeld *et al.*, 2018). Resolving these issues will require to assemble a much larger dataset of  
819 observed long time-series of CH<sub>4</sub> fluxes and associated physical and biogeochemical variables-, [such](#)  
820 [as those reported by Velasco \*et al.\* \(2024\) and Natchimuthu \*et al.\* \(2016\).](#) To help further calibrate



821 and evaluate the model, this much larger pool of observations should span a broader range of  
822 environmental conditions to be more representative of the lake CH<sub>4</sub> dynamics on the continental to  
823 global scales. Overall, given the scarce spatiotemporal observations and the limited possibility to  
824 validate current knowledge on process regulation in fields, it is difficult for all existing models to  
825 produce the details of the CH<sub>4</sub> dynamics in specific single lakes. Hence, the temporal patterns of CH<sub>4</sub>  
826 fluxes simulated by FLAME-v1.0 are seen as acceptable, as its main focus is to capture the broad  
827 spatio-temporal patterns of CH<sub>4</sub> emissions across the thousands of lakes that need to be accounted for  
828 in large-scale applications (see section 3.3).

829

830

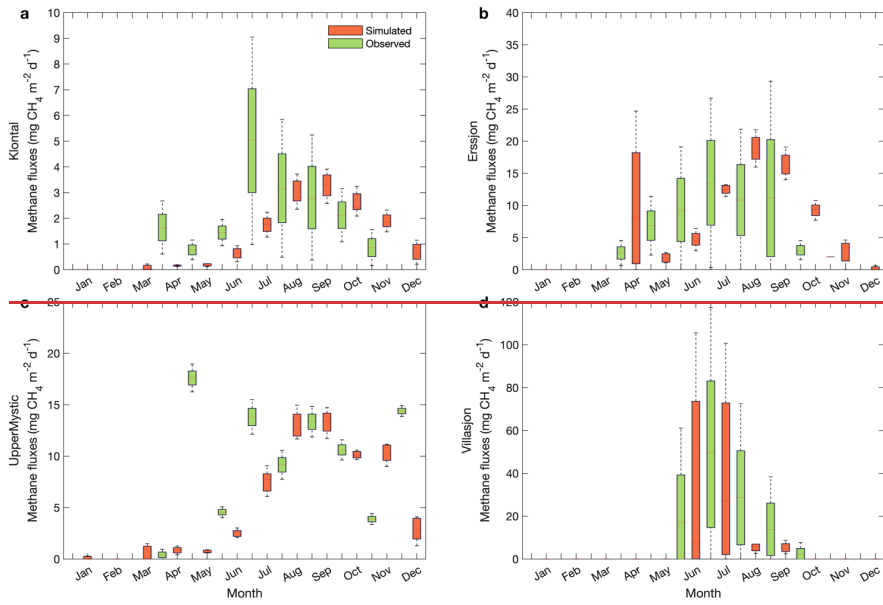

831

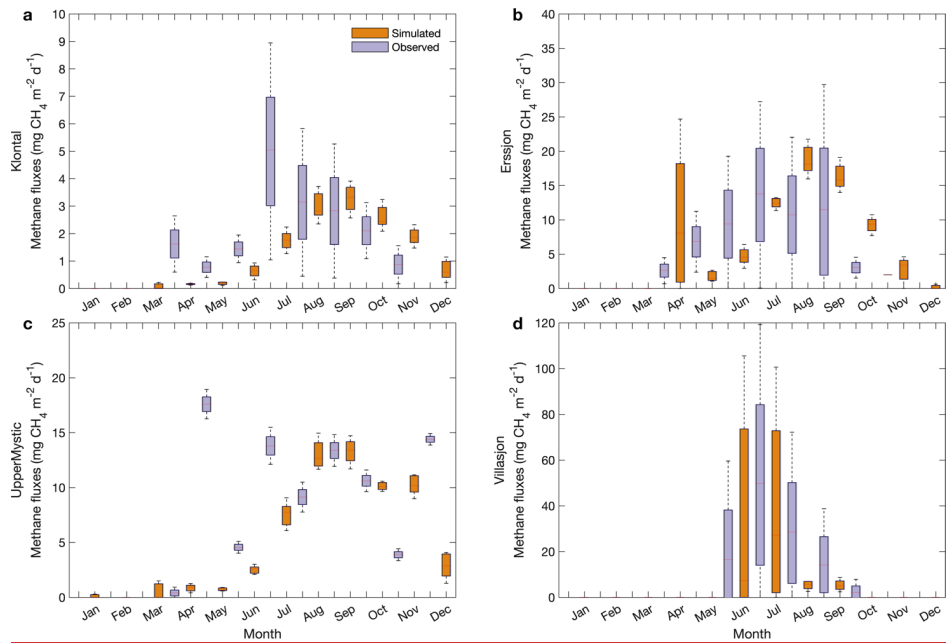

832 Fig. 6. Evaluation of FLaMe-v1.0 against monthly mean CH<sub>4</sub> fluxes recorded in long time-series of  
 833 observations in four real lakes. (a) Klöntal, (b) Erssjön, (c) Upper Mystic, and (d) Villasjön. The detailed  
 834 lake characteristics are listed in Table 2. The climate forcings for these four lakes are extracted from  
 835 GSWP3-W5E5 model from ISIMIP3a. Note the different scales of CH<sub>4</sub> emissions in each lake.

### 836 3.3 FLaMe-v1.0 application on the European domain

#### 837 3.3.1 Evaluation of FLaMe-v1.0 in European lakes

838 In the European scale application of FLaMe-v1.0, we first evaluated the simulated  $F_{PP}$  against  
 839 the empirical ranges reported by Wetzell (2001) for lakes under ultraoligotrophic (0–5  $\mu\text{gP L}^{-1}$ ),  
 840 oligotrophic (5–10  $\mu\text{gP L}^{-1}$ ), mesotrophic (10–30  $\mu\text{gP L}^{-1}$ ), and eutrophic ( $>30 \mu\text{gP L}^{-1}$ ) conditions  
 841 (Fig. 7 and Fig. S18). Figure 7 shows that, under different trophic status, the means and medians of  
 842  $F_{PP}$  simulated by FLaMe-v1.0 (for 953 representative lakes) fall well within the reported ranges.  
 843 Slight deviations could only be observed in ultraoligotrophic lake for which the model tends to  
 844 slightly overestimate  $F_{PP}$  (Fig. 7a). Ultraoligotrophic and oligotrophic lakes reveal very similar mean  
 845 and median of  $F_{PP}$  that fall at the higher ends of the ranges specified by Wetzel (2001) or even exceed  
 846 it in the case of ultraoligotrophic lakes. In turn, mesotrophic and eutrophic lakes reveal mean and  
 847 median  $F_{PP}$  that fall at the lower ends of the ranges specified by Wetzel (2001). This slight difference  
 848 of simulated versus observed  $F_{PP}$  in lakes with different trophic conditions can be explained by the  
 849 relatively low value of  $K_{s,P}$  (90  $\mu\text{g L}^{-1}$ ) compared to the concentration of [TDPTP] (Fig. S7–S8), as  
 850 well as the simplified representation of lake primary production in our model. When extending the  
 851 representative lakes to all real lakes in the European domain ( $n=108407$ ), the median and mean of  
 852 simulated  $F_{PP}$  are still within the specified ranges but are reduced slightly for all trophic status (Fig.

853 S18), attributed to the positively skewed distribution of [~~T~~DPTP] (Fig. S8), i.e., many lakes have a  
854 low [~~T~~DPTP].

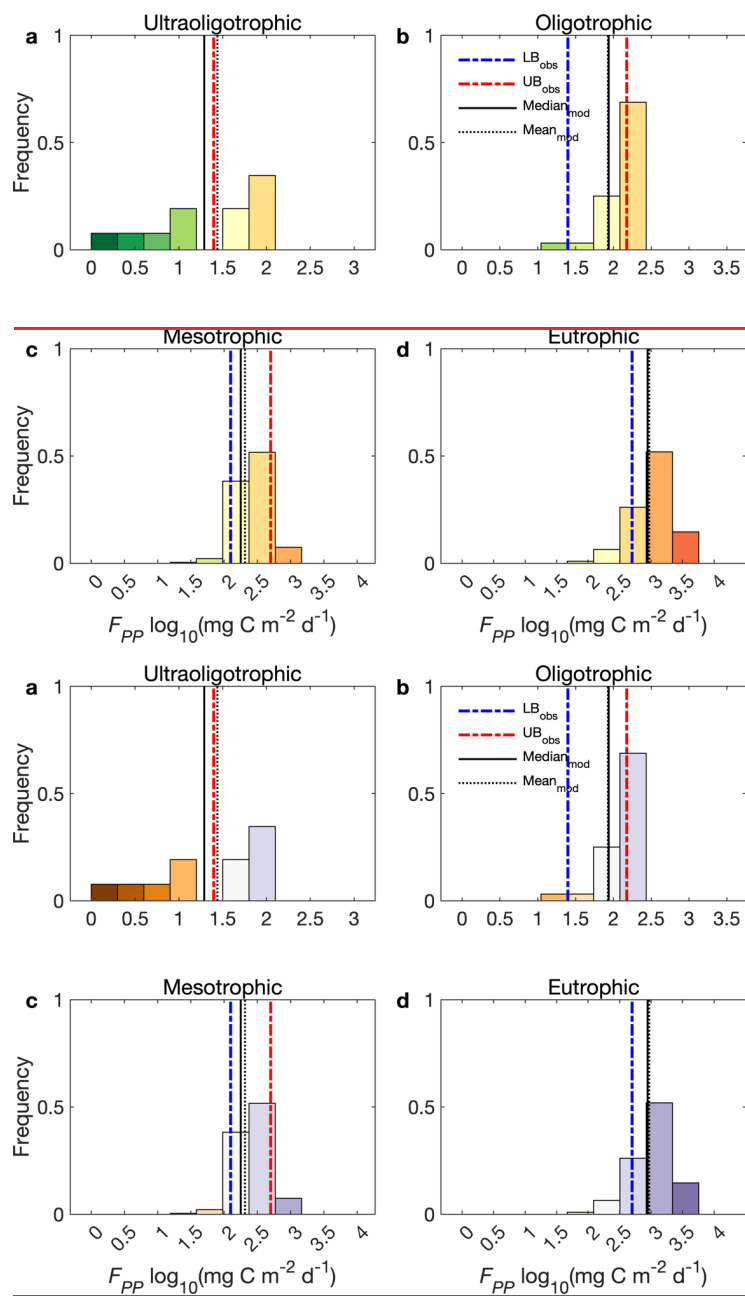

Fig. 7. Comparison of simulated primary production ( $F_{PP}$ ) with empirical estimates reported by Wetzel (2001). The histograms show the frequency distributions of simulated  $F_{PP}$  (log scale) for 953 representative lakes that are grouped into ultraoligotrophic ( $0-5 \mu\text{gP L}^{-1}$ ), oligotrophic ( $5-10 \mu\text{gP L}^{-1}$ ), mesotrophic ( $10-30 \mu\text{gP L}^{-1}$ ), and eutrophic ( $>30 \mu\text{gP L}^{-1}$ ) lakes. In the figure, blue and red dashed lines are the lower and upper bounds ( $LB_{\text{obs}}$  and  $UB_{\text{obs}}$ ), respectively, of empirical ranges reported by Wetzel (2001) in this class of lakes; Black solid and dotted lines are the  $\text{median}_{\text{mod}}$  and  $\text{mean}_{\text{mod}}$ , respectively, of simulated  $F_{PP}$  for this class of lakes.

Next, we evaluated the simulated diffusive and ebullitive  $\text{CH}_4$  emission rates against measurements in boreal and central European regions during late summer (August–September, 2010–2011) synthesized by Rinta *et al.* (2017) (Fig. 8 and Fig. S19). As Rinta *et al.* (2017) compiled *in-situ* measurements of diffusive and ebullitive  $\text{CH}_4$  emission rates from 17 boreal lakes (in southern Finland and Sweden) and 30 lakes of central European lakes (in The Netherlands, Germany and Switzerland), we extracted the mean  $\text{CH}_4$  emission rates during August–September for representative lakes located in the grid cells corresponding to these two regions. Results indicate that the simulated diffusive  $\text{CH}_4$  emissions for boreal European lakes (Fig. 8) agree well with the observations; yet the simulated ebullitive  $\text{CH}_4$  emissions are slightly higher than the observations, leading to slightly higher total emissions. For central European lakes, the simulated diffusive  $\text{CH}_4$  emissions are slightly lower than the observations, while the simulated ebullitive  $\text{CH}_4$  emissions are slightly higher, leading to a good agreement in the total emissions (Fig. 8). Moreover, Rinta *et al.* The slightly higher ebullitive fluxes simulated by FLAME-v1.0 may be attributed to not only the uncertain choice of model

parameters (e.g.,  $\alpha$ ) but also to the systematically lower measured ebullitive fluxes in Rinta *et al.* (2017), where ebullition was separated from diffusion when the measured fluxes produced unreasonably high  $k_{600}$ . Moreover, Rinta *et al.* (2017) reported 6 and 27 times higher diffusive and ebullitive fluxes in central Europe, respectively, while our model simulates a smaller contrast of a 3- and 7-fold difference. This smaller contrast in the simulation can likely be explained by the higher variability in measurements, reflecting diverse climate, light and catchment properties in real lakes, while the variabilities in the simulated fluxes are significantly lower, probably due to more homogeneous representations of environmental conditions in the FLaMe-simulations. Specifically, the large differences in measured CH<sub>4</sub> emissions in boreal and central European lakes are attributed to their distinct characteristics, including climate (colder and dryer in the boreal region), light regime (larger absorbance in the boreal region) and catchment properties, in particular land-use (dominance of forests and smaller fraction of managed agricultural land in the boreal region). However, in FLaMe-v1.0, the catchment properties are not fully captured by our sole, simplified indicator of [TDPTP], such that the differences between boreal and central European lakes are underestimated. The coarse resolution of our model also likely reduces the represented range of climate conditions in our simulations compared to those experienced by the sampled lakes. In the meantime, observations are also associated with uncertainties, because measurements were not continuous in time and might thus not be fully representative of the late summer-early fall period, as well as sampling and measuring CH<sub>4</sub> emissions, in particular via the ebullitive pathway, is all but a trivial task. Nevertheless, the above evaluation of FLaMe-v1.0 against observations overall reveals the ability of our model to reproduce broadly observed patterns in primary production and CH<sub>4</sub> emissions observed across distinct trophic status and landscapes.

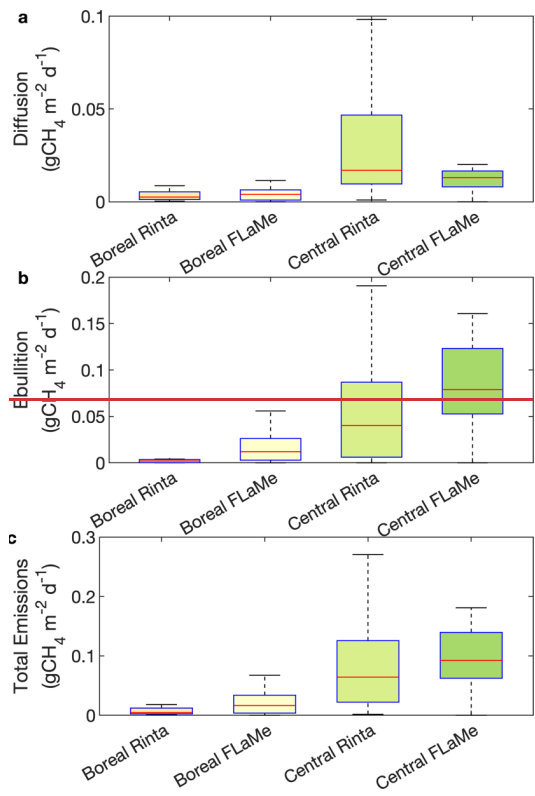



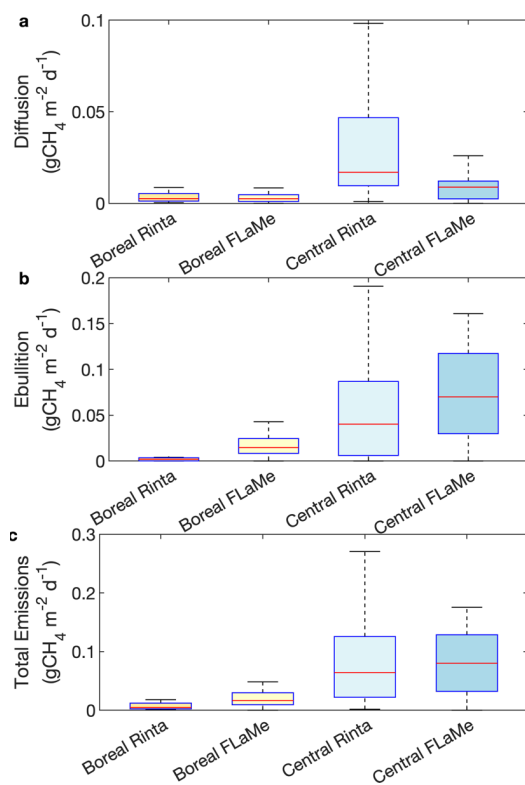

**Fig. 8.** Comparison of simulated diffusive (top), ebullitive (middle) and total (bottom) CH<sub>4</sub> emission rates with the measurements compiled by Rinta *et al.* (2017). The datasets reported by Rinta *et al.* (2017) comprises the diffusive, ebullitive and total emission rates from 17 boreal lakes in Finland and Sweden and 30 lakes of central European lakes in The Netherlands, Germany and Switzerland. The boxes represent the 25% and 75% quartiles, and the whiskers cover the 95% confidence intervals. The same figure with a log scale is presented in Fig. S19.

### 3.3.2 European scale assessment of lake CH<sub>4</sub> emissions

The continental-scale assessment indicates that European lakes smaller than 1000 km<sup>2</sup> have an annual mean emission of 0.97 Tg CH<sub>4</sub> yr<sup>-1</sup> from autochthonous phytoplankton production during the

911 period of 2010–2016, of which 30% and 70% are through diffusive and ebullitive transport pathways,  
912 respectively (Fig. 9 and Fig. S20). Note that, by including the estimated emissions from European  
913 lakes larger than 1000 km<sup>2</sup> with two different strategies (Supplementary Text S5), we provide a back  
914 of the envelope estimate for the mean total annual emission as 1.03–1.10 Tg CH<sub>4</sub> yr<sup>-1</sup>, which falls  
915 within the lower end of a previously reported range (0.9–2.5 Tg CH<sub>4</sub> yr<sup>-1</sup>) (Petrescu *et al.* 2023;  
916 Lauerwald *et al.*, 2023). The mean CH<sub>4</sub> emission rates per unit lake area amounts to 7.39 g CH<sub>4</sub> m<sup>-2</sup>  
917 yr<sup>-1</sup>, while the mean CH<sub>4</sub> emission rates per unit land surface area amounts to 0.054 g CH<sub>4</sub> m<sup>-2</sup> yr<sup>-1</sup>.  
918 Both emission rates decrease from South to North, despite the larger number of lakes and lake surface  
919 area in Northern Europe (Messenger *et al.*, 2016; Fig. S4). This south to north decrease can be  
920 explained by a much higher CH<sub>4</sub> emission rate in the South of Europe (reaching 109.6 g CH<sub>4</sub> m<sup>-2</sup> yr<sup>-1</sup>  
921 <sup>1</sup>) driven by much higher eutrophic status of southern lakes (together with higher temperatures), which  
922 outcompetes the effect of the larger lake area in the Scandinavian region and Finland (which  
923 contribute to ~30% of the European lake area). The ice-cover in northern lakes also contribute to the  
924 south-to-north gradient of CH<sub>4</sub> emission rates, which is tested to decrease the European lake  
925 emissions by 7%. This latitudinal pattern of CH<sub>4</sub> emissions per unit lake area is broadly consistent  
926 with that reported by Johnson *et al.* (2022) based on observations.

927 In terms of seasonal variability, our model results are in full agreement with the sparse data set  
928 of seasonally resolved observations (Tan *et al.*, 2015) and show that European lakes as a whole act  
929 as a continuous CH<sub>4</sub> source including during the winter months. (individual lakes during ice-covered  
930 periods will do not emit CH<sub>4</sub>). Moreover, the simulated CH<sub>4</sub> production and emission reveal a sharp  
931 10-fold increase from late Spring to late Summer that is largely driven by the increase in ambient  
932 temperature and  $F_{pp}$  rates. These findings underscore the importance of accounting for seasonal

933 variations in CH<sub>4</sub> emissions when refining regional methane budgets (Tan *et al.*, 2015; Guo *et al.*,  
934 2020; Johnson *et al.*, 2022; Stavert *et al.*, 2022). A simple extrapolation of observed summer  
935 emissions to the yearly timescale would thus lead to an overestimation of yearly mean fluxes. In  
936 addition, model results also reveal a slight time-lag between the most favorable climate conditions  
937 (air temperature and light) and the maximum CH<sub>4</sub> production. This time lag in the model can be  
938 explained by the cascade of biogeochemical reactions (primary production, mineralization, O<sub>2</sub>  
939 depletion and onset of CH<sub>4</sub> production) that ultimately control benthic CH<sub>4</sub> fluxes, and the timescale  
940 of heat transfer from the lake surface to the deepest portion of our valley-shape lake bottom. This  
941 slight time-lag is further amplified by the time required for the benthic CH<sub>4</sub> to reach the water-air  
942 interface, although this effect is secondary due to the dominance of shallow lakes (with mean depth  
943 <197.8 m for 98.790% of lakes; Messenger *et al.*, 2016) within the European domain. Finally, the  
944 broad seasonal pattern in CH<sub>4</sub> emissions is complicated by the episodic releases of storage fluxes  
945 during lake turnovers which occur during spring (March and April; emissions>production) and fall  
946 (October and November; emission circa 85% of the production). Lake turnovers amplify total  
947 emissions for the duration of these short-lived events.

948

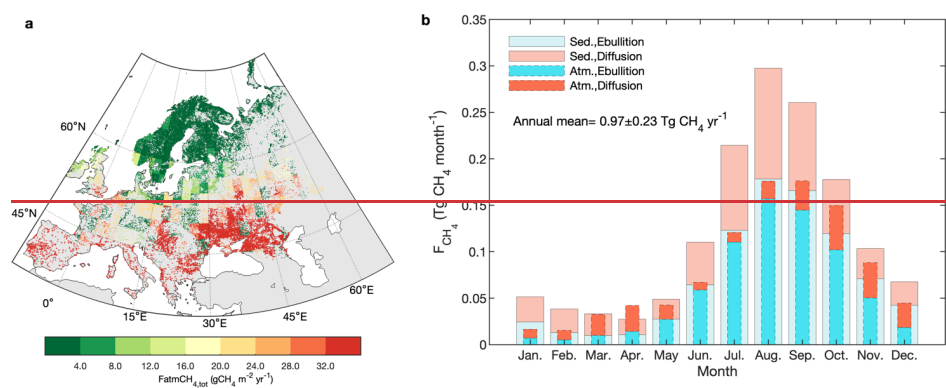

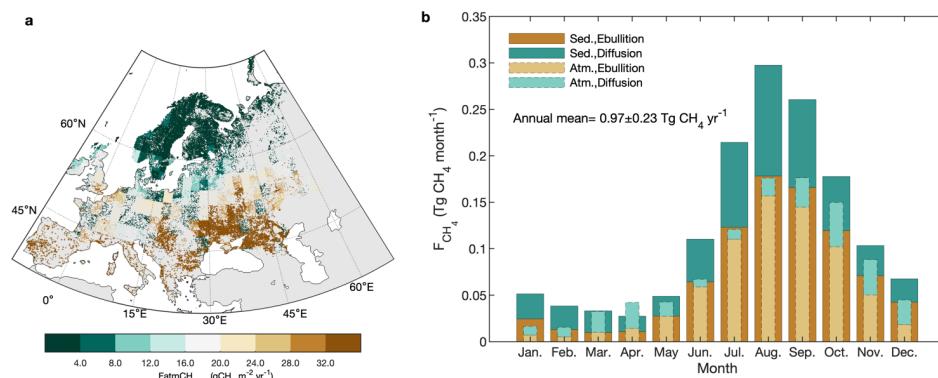

**Fig. 9. Methane (CH<sub>4</sub>) emissions from European lakes. (a) Spatial distribution of annual mean total CH<sub>4</sub> emissions (sum of diffusion and ebullition) for the period of 2010-2016, expressed in per unit of lake area. (b) Seasonality of total CH<sub>4</sub> production (dashed-colors wide bars with full lines) and emission (full-colors narrow bars with dashed lines) fluxes and their split between ebullitive and diffusive pathways (period 2010-2016).**

### 3.3.3 Sensitivity and uncertainty analysis

The sensitivity analysis of annual mean CH<sub>4</sub> emissions from European lakes to key model parameters (listed indicated by asterisks in Table 31) are summarized in Table 43. Table 43 indicates that the fraction of benthic organic matter mineralization channeled to methanogenesis ( $f_{mm}$ ) is the most sensitive parameter, and the increase (decrease) of  $f_{mm}$  by one SD leads to an increase (decrease) of European lake CH<sub>4</sub> emissions by 0.92 Tg CH<sub>4</sub> yr<sup>-1</sup> or 95% (0.67 Tg CH<sub>4</sub> yr<sup>-1</sup> or 69%). This is intuitive as a higher fraction of carbon channeled to methanogenesis will increase the continental scale CH<sub>4</sub> emissions, although the response is nonlinear. This is also supported by the findings of high potential methane production rates in various freshwater systems (including the lakes, reservoirs and rivers) (Bodmer *et al.*, 2025). The second and third most sensitive parameters are the maximum carbon fixation rate per unit of Chlorophyll-a ( $P_{chl,max}$ ) and the half saturation constant of phosphorus

965 ( $K_{s,P}$ ). An increase (decrease) of  $P_{chl,max}$  by one SD could increase (decrease) the European lake CH<sub>4</sub>  
 966 emissions by 0.77 Tg CH<sub>4</sub> yr<sup>-1</sup> or 79% (0.63 Tg CH<sub>4</sub> yr<sup>-1</sup> or 65%). This is again logical as a higher  
 967  $P_{chl,max}$  indicates a stronger capacity of phytoplankton to assimilate carbon, thus resulting in higher  
 968 amounts of organic carbon available for CH<sub>4</sub> production and emissions. The increase (decrease) of  
 969  $K_{s,P}$  by one SD decreases (increases) the European lake CH<sub>4</sub> emissions by 0.46 Tg CH<sub>4</sub> yr<sup>-1</sup> or 48%  
 970 (0.22 Tg CH<sub>4</sub> yr<sup>-1</sup> or 22%), a result which can be explained by a stronger TDP limitation of primary  
 971 production when  $K_{s,P}$  increases, resulting in lower CH<sub>4</sub> production and emissions. The next most  
 972 sensitive parameters are the mineralization and burial rates ( $k_{20}$  and  $k_{bur}$ ), for which an increase  
 973 (decrease) in  $k_{20}$  by one SD result in an increase (decrease) of European lake CH<sub>4</sub> emissions by 0.19  
 974 Tg CH<sub>4</sub> yr<sup>-1</sup> or 20% (0.39 Tg CH<sub>4</sub> yr<sup>-1</sup> or 40%), while an increase (decrease) of  $k_{bur}$  by one SD leads  
 975 to a decrease (increase) of European lake CH<sub>4</sub> emissions by 0.35 Tg CH<sub>4</sub> yr<sup>-1</sup> or 36% (0.21 Tg CH<sub>4</sub>  
 976 yr<sup>-1</sup> or 22%). This is straightforward to interpret as a higher mineralization rate ( $k_{20}$ ) will channel  
 977 more mineralization into methanogenesis (and also via lower O<sub>2</sub> levels in the lake), while a higher  
 978 burial rate ( $k_{bur}$ ) translates to a lower relative amount of organic matter degradation, and thus lower  
 979 CH<sub>4</sub> production and emissions.

980 The other parameters (including the shape parameter of the CH<sub>4</sub> production rate versus sediment  
 981 depth  $\alpha_{min}$ , the temperature dependence of mineralization  $\theta$ , as well as the maximum CH<sub>4</sub> oxidation  
 982 rate  $k_{max}$  and its temperature dependence  $Q_{10,ox}$ ) are less sensitive, with their relative effects on  
 983 European lake CH<sub>4</sub> emissions ranging from 1–20%. The shape parameter  $\alpha_{min}$  can affect the CH<sub>4</sub>  
 984 emissions as it determines the split between diffusive and ebullitive pathways, i.e., a higher  $\alpha_{min}$  favors  
 985 a higher fraction of CH<sub>4</sub> emitted to water and atmosphere through the diffusive pathway, a pathway  
 986 that is more prone to oxidation thus lowering total CH<sub>4</sub> emissions. We also find that a higher

987 temperature dependence of mineralization ( $\theta$ ) results in a lower CH<sub>4</sub> emission. This can be explained  
 988 by the reference temperature of 20°C in the expression of the  $\theta$  function, higher than the mean water  
 989 temperature in most lakes, leading to a faster drop in mineralization for a larger  $\theta$  when temperature  
 990 is lower than 20°C. The parameter  $k_{max}$  barely impacts the total CH<sub>4</sub> emissions, as this parameter  
 991 mostly influences the thickness of the water layers where the profiles of oxygen and methane overlap  
 992 and the oxidation occurs, while the volume-integrated rates remain essentially unaltered (~~Regnier *et*~~  
 993 ~~*al.*, 2011~~; Thullner and Regnier, 2019; Grossart *et al.*, 2011). As for the temperature dependence of  
 994 oxidation ( $Q_{10,ox}$ ), the sensitivity is even weaker because changing the  $Q_{10,ox}$  value has a lower impact  
 995 on the oxidation rates than changing  $k_{max}$ . Compared to other parameters (such as  $f_{mm}$  and  $P_{chl,max}$ ),  
 996 the relatively low effects of  $k_{max}$  and  $Q_{10,ox}$  does not mean that the methane oxidation is not important,  
 997 but highlight the dominant role of organic carbon production and decomposition on lake CH<sub>4</sub>  
 998 emissions, which were seldom simulated in previous models. Note that in our current model version,  
 999 CH<sub>4</sub> oxidation only occurs through the aerobic pathway and thus neglects the potential additional  
 1000 controls induced by anaerobic pathways (Mostovaya *et al.*, 2022; Su *et al.*, 2020).

1001 With the samples produced by the above sensitivity analysis and complemented by samples from  
 1002 additional tests, we utilized a Random Forest (RF) model to assess the uncertainty of European lake  
 1003 CH<sub>4</sub> emissions (see details in section 2.5.4). The RF model has a  $R^2$  of 0.73 and Root of Mean Square  
 1004 Error (RMSE) of 0.24 Tg CH<sub>4</sub> yr<sup>-1</sup> for the train set (Fig. 10a) and a  $R^2$  of 0.52 and RMSE of 0.30 Tg  
 1005 CH<sub>4</sub> yr<sup>-1</sup> for the out-of-bag samples (Fig. 10b), suggesting that ~~the~~ it can capture ~~well~~ the relationship  
 1006 between model parameters and European lake CH<sub>4</sub> emissions well. Using these ensembles of CH<sub>4</sub>  
 1007 emissions, the uncertainty (or SD) of European lake CH<sub>4</sub> emissions associated with the choice of  
 1008 biogeochemical parameter values was estimated as 0.23 Tg CH<sub>4</sub> yr<sup>-1</sup>. Therefore, during the period of

1009 2010-2016, the European lakes (with surface areas between 0.1–1000 km<sup>2</sup>) have an annual mean  
1010 emission of 0.97±0.23 Tg CH<sub>4</sub> yr<sup>-1</sup>.

1011 With the RF model, we can also identify the importance of key model parameters involved as  
1012 predictors (Fig. 10c). We noticed that the first four leading parameters are also the most sensitive  
1013 parameters as identified in Table 43, while the importance of other parameters are slightly different  
1014 from the sensitivity analysis. This slight difference can be attributed to the interactions of model  
1015 parameters that are overlooked in the sensitivity analysis. Overall, from the sensitivity and uncertainty  
1016 analysis, we find that the European lake CH<sub>4</sub> emissions are strongly controlled by the carbon  
1017 biogeochemical dynamics, which, however, was not fully accounted for in previous lake models.

1018 **Table 43** Sensitivity of European lake CH<sub>4</sub> emissions (Tg CH<sub>4</sub> yr<sup>-1</sup>) to key model  
 1019 parameters. Mean and SD are the mean and standard deviation of a particular parameter.  
 1020 Mean±SD indicates that the parameter values are adjusted by ± one SD; Mean±0.5SD  
 1021 indicates that the parameter values are adjusted by ±0.5 SD.

| Parameter setting                 |                 | Mean±SD                 |                    |                         |                    | Mean±0.5SD              |                    |                         |                    |
|-----------------------------------|-----------------|-------------------------|--------------------|-------------------------|--------------------|-------------------------|--------------------|-------------------------|--------------------|
|                                   |                 | -SD                     |                    | +SD                     |                    | -0.5SD                  |                    | +0.5SD                  |                    |
|                                   |                 | <u>Absolute/percent</u> |                    | <u>Absolute/percent</u> |                    | <u>Absolute/percent</u> |                    | <u>Absolute/percent</u> |                    |
| Primary production                | $P_{chl\_max}$  | 0.344                   | <span>▲-65%</span> | 1.743                   | <span>▲+80%</span> | 0.642                   | <span>▲-34%</span> | 1.376                   | <span>▲+42%</span> |
|                                   | $K_{c,P}$       | 1.432                   | <span>▲+48%</span> | 0.754                   | <span>▲-22%</span> | 1.170                   | <span>▲+21%</span> | 0.852                   | <span>▲-12%</span> |
| Mineralization and burial rates   | $k_{20}$        | 0.578                   | <span>▲-40%</span> | 1.164                   | <span>▲+20%</span> | 0.758                   | <span>▲-22%</span> | 1.141                   | <span>▲+18%</span> |
|                                   | $k_{bur}$       | 1.317                   | <span>▲+36%</span> | 0.761                   | <span>▲-22%</span> | 1.107                   | <span>▲+14%</span> | 0.856                   | <span>▲-12%</span> |
|                                   | $\theta$        | 1.028                   | <span>▲+6%</span>  | 0.928                   | <span>▲-4%</span>  | 0.989                   | <span>▲+2%</span>  | 0.968                   | <span>▲0%</span>   |
|                                   | $f_{mm}$        | 0.302                   | <span>▲-69%</span> | 1.888                   | <span>▲+95%</span> | 0.605                   | <span>▲-38%</span> | 1.437                   | <span>▲48%</span>  |
| Methane oxidation                 | $K_{max}k_{mu}$ | 1.057                   | <span>▲+9%</span>  | 0.930                   | <span>▲-4%</span>  | 1.009                   | <span>▲+4%</span>  | 0.953                   | <span>▲-2%</span>  |
|                                   | $\alpha$        | 0.992                   | <span>▲+2%</span>  | 0.983                   | <span>▲+1%</span>  | 0.978                   | <span>▲+1%</span>  | 0.973                   | <span>▲0%</span>   |
| <u>Diffusion coefficient</u>      | $k_{diff}$      | 1.124                   | <span>▲+16%</span> | 1.046                   | <span>▲+8%</span>  | 1.068                   | <span>▲+10%</span> | 1.048                   | <span>▲+8%</span>  |
| Base value of the shape parameter | $\alpha_{min}$  | 1.222                   | <span>▲+26%</span> | 0.840                   | <span>▲-13%</span> | 1.077                   | <span>▲+11%</span> | 0.891                   | <span>▲-8%</span>  |

插入的单元格



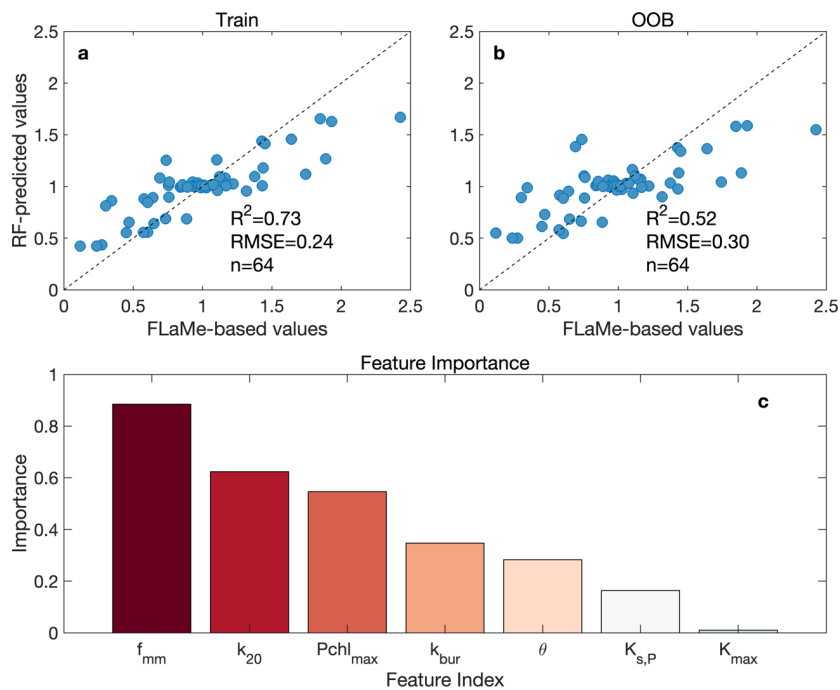

**Fig. 10. Random Forest (RF) model for the uncertainty analysis. (a) and (b) are the train and test (Out-of-Bag prediction) of the RF model. (c) shows the importance of key model parameters. Note that the parameters of  $\alpha_{min}$  and  $Q_{10,ox}$  are excluded from illustration due to their second order of importance (indicated by negative values).**

#### 4. Model limitations

We have illustrated that FLaMe-v1.0 is able to capture complex physical-biogeochemical behaviors for lakes with diverse settings and environmental controls. Specifically, the FLaMe-model-v1.0 has been evaluated against (i) observational temporal variations of  $CH_4$  fluxes at four contrasting, well-surveyed real lakes, (ii) the empirical ranges of primary production under different trophic status reported by Wetzel (2001), and (iii) observational patterns of  $CH_4$  emissions against trophic and

1033 climate gradients spanning the European domain (Rinta *et al.*, 2017). Moreover, the European scale  
1034 simulation produces a spatial pattern of lake CH<sub>4</sub> emission rates consistent with observation-based  
1035 upscaling approaches (Johnson *et al.*, 2022). This continental scale application also demonstrates the  
1036 power of our modelling framework that rests on a lake clustering approach and on a routing of nutrient  
1037 (TDP) inputs from surrounding catchments to lakes that allow to account for eutrophication effects.  
1038 Our results thus suggest that the FLame-v1.0 modelling framework performs well in providing  
1039 reliable spatio-temporal patterns of lake CH<sub>4</sub> emissions at the ~~largeregional~~ scale: ~~(with lake areas~~  
1040 ~~<1000 km<sup>2</sup>).~~ However, the results also pinpoint to several key aspects to be improved in the model  
1041 and highlight critical data gaps that must be addressed in the future.

1042 First, the organic carbon module only accounts for autochthonous OC production as the substrate  
1043 for methanogenesis, but ignores the contribution of allochthonous OC inputs leached from the  
1044 ~~surrounding~~ catchments, rivers and streamflow. This is based on the distinct reactivity of  
1045 autochthonous ~~andvs.~~ allochthonous OC inputs, with the latter being more refractory to ~~microbial~~  
1046 ~~activities (mineralization and decomposition).~~ As a result, FLame-v1.0 may provide conservative  
1047 estimates of CH<sub>4</sub> ~~productionsproduction~~ and ~~emissionsemission~~. However, neglecting the  
1048 allochthonous C inputs may at the same time minimize the feedback of OC on light penetration,  
1049 leading to systematically biased estimates ~~of autochthonous production~~ (section 2.2.2.1). Moreover,  
1050 transient lake phosphorus dynamics and the co-limitations by nitrogen, albeit assumed to be less  
1051 important, are neglected and might increase the uncertainty in the estimates of CH<sub>4</sub> production and  
1052 emission. In addition, our primary production model does not resolve the short-term (e.g., (sub)daily)  
1053 dynamics of algae growth induced by climate variability, rendering model-data comparison more  
1054 difficult. In future model developments, these limitations could be addressed by (i) integrating or

1055 routing the lake water, carbon and nutrient fluxes along the global river network, which would allow  
1056 to simultaneously solve the issue of time-invariant lake water levels in current global lake models  
1057 (Golub *et al.*, 2022), including ours; (ii) refining the carbon module by incorporating more dynamic  
1058 models for algal growth as well as P and N uptake and recycling processes within lakes.

1059 Second, several model assumptions and implementations are based on empirical or theoretical  
1060 knowledge, which may lead to biases in the estimation of CH<sub>4</sub> fluxes. For instance, the present version  
1061 of FLAME (i.e., v1.0) neglects the plant-mediated emission pathway (~~trough-rooted-plant~~) ~~in the~~  
1062 ~~littoral-zone due to the lack of observational data for model calibration. Moreover through aerenchyma~~  
1063 ~~in rooted plant) in the littoral zone (Mayr *et al.*, 2020; Zimmermann *et al.*, 2019) due to the lack of~~  
1064 ~~observational data for model calibration. Moreover, a recently reported process, i.e., the horizontal,~~  
1065 ~~advective littoral-pelagic transport of oxygen and methane (Doda *et al.*, 2024; Bouffard *et al.*, 2025)~~  
1066 ~~was ignored for the following reasons: (1) The current FLAME-v1.0 relies on a 1-D vertical~~  
1067 ~~representation while explicitly accounting for horizontal transport would require a 2-D framework;~~  
1068 ~~and (2) observations related to horizontal transport remain limited, and whether this is an ubiquitous~~  
1069 ~~feature of the CH<sub>4</sub> dynamics across a wide range of lakes will require further observational evidences.~~  
1070 Furthermore, in our model, the lake is assumed to follow a “valley” shape. Although this is an  
1071 advancement from the “bucket” shape used in previous process-based lake models of CH<sub>4</sub> emissions  
1072 (e.g., LAKE 2.0, ABLM, and bLake4Me), it remains a simplified assumption that captures important  
1073 but not all features of a realistic lake geometry. Furthermore, several benthic CH<sub>4</sub> processes are highly  
1074 parameterized. For instance, the split between aerobic and anaerobic decomposition of organic matter  
1075 is represented by a single parameter  $f_{mm}$  and is determined based on the data compilation from  
1076 Bastviken (2022). This simplification leads to the same temperature dependence of CH<sub>4</sub> processes

1077 occurring in the sediment as that of pelagic and benthic mineralization. This is a shortcoming although  
1078 it should be noted that the overall temperature dependence of CH<sub>4</sub> emissions, which results from the  
1079 combined effects of OC production, mineralization, and subsequent CH<sub>4</sub> processes, was found to fall  
1080 well within the observed ranges reported by Aben *et al.* (2017) (Fig. S21). The split of diffusive and  
1081 ebullitive CH<sub>4</sub> fluxes is also currently captured by an empirically determined threshold depth ( $z_{eb,min}$ )  
1082 based on limited observations by Langenegger *et al.* (2019). Moreover, the effects of heat transfer  
1083 and CH<sub>4</sub> bubbles migration in the sediment are not resolved, which may lead to biased simulation of  
1084 CH<sub>4</sub> fluxes especially for the timing. These are simplified representations related to the highly  
1085 complex pathways of CH<sub>4</sub> production and emission, which needs to be improved by more mechanistic  
1086 representations of the biogeochemical processes controlling carbon cycling, CH<sub>4</sub> production and  
1087 transport via diffusion and bubble ascent. In addition, we acknowledge that the fixed grid spacing  
1088 currently limits the model application to very shallow lakes, which could be solved by adopting a  
1089 variable grid spacing scaling to the maximum lake depth.

1090 Third, different modules of the FLaMe-~~model-v1.0~~ could benefit from more comprehensive  
1091 calibration and evaluation but those are limited by data availability. Although FLaMe-v1.0 has been  
1092 evaluated against several timeseries of observed data collected in four well-surveyed lakes with  
1093 contrasted dynamics, a full evaluation in the context of large-scale application would benefit from a  
1094 significantly larger and representative set of observational data. Moreover, the *in-situ* climate  
1095 conditions may vary greatly from the grid-level forcings, and the lake water dynamics may also affect  
1096 the CH<sub>4</sub> fluxes significantly (e.g., Upper Mystic Lake; Varadharajan, 2009). Thus, a full  
1097 comprehensive set of *in-situ* measurements of climate, water level, physical and biogeochemical  
1098 variables would be highly valuable for the purpose of further model development, calibration and

1099 evaluation. At the European scale, we partly circumvented these limitations by evaluating lake  
1100 primary production against the broad ranges reported by Wetzel (2001), and the simulated diffusive  
1101 and ebullitive CH<sub>4</sub> fluxes across the environmental (nutrient and climate) gradients compiled by Rinta  
1102 *et al.* (2017). In this context, complementary time-series of vertically resolved organic carbon, CH<sub>4</sub>  
1103 and O<sub>2</sub> concentrations, as well as high frequency measurements of CH<sub>4</sub> fluxes capturing short-lived  
1104 emissions via the storage and ebullitive pathways and covering heterogeneity of CH<sub>4</sub> fluxes in large  
1105 lakes (Denfeld *et al.*, 2018; Mayr *et al.*, 2020; Zimmermann *et al.*, 2019) would help further calibrate  
1106 and evaluate the FLame-[model-v1.0](#). These measurements should be performed using a sufficiently  
1107 large set of representative lakes covering the full range of lake morphologies, landscape properties,  
1108 and climate.

## 1109 5. Conclusion and outlook

1110 In this study, we developed and tested a new process-based biogeochemical modeling framework  
1111 (FLame-[v1.0](#)) to simulate lake CH<sub>4</sub> fluxes on the large-scale and, as a “proof of concept”, applied the  
1112 model to European lakes. The physical lake model builds on the Canadian Small Lake Model (CSLM)  
1113 and is coupled to a set of novel biogeochemical modules describing lake organic matter, oxygen and  
1114 methane dynamics. We then showcased the abilities and performance of FLame-[v1.0](#) by: (1)  
1115 analyzing the overall behaviors of the coupled C-O<sub>2</sub>-CH<sub>4</sub> dynamics in two representative cases (a  
1116 deep oligotrophic lake driven by cold climate in Northern Europe and a shallow eutrophic lake driven  
1117 by warm climate in Southern Europe) as well as their decomposition, and (2) evaluating simulated  
1118 temporal patterns of CH<sub>4</sub> fluxes against observations at four well-surveyed lakes with long-term  
1119 timeseries. Simulation results were consistent with our common knowledge of lake CH<sub>4</sub> dynamics,  
1120 suggesting that FLame-[v1.0](#) can capture the patterns of CH<sub>4</sub> production and emissions across

1121 different lake types as well as their responses to the changes in environment conditions, despite the  
1122 complexity of underlying biogeochemical processes. Furthermore, by applying the model to boreal  
1123 and central European lakes, we showed that FLaMe-[v1.0](#) captures well the observed magnitudes of  
1124 both diffusive and ebullitive CH<sub>4</sub> fluxes as well as the difference between boreal and central lakes.  
1125 Finally, at the European scale, FLaMe-[v1.0](#) estimates total CH<sub>4</sub> emissions from lakes ~~smaller than~~  
1126 ~~with areas of 0.1–1000~~ km<sup>2</sup> (n=108407, total area = 1.33×10<sup>5</sup> km<sup>2</sup>) as 0.97±0.23 Tg CH<sub>4</sub> yr<sup>-1</sup>. In  
1127 addition, the model resolves spatial patterns and seasonal variations of CH<sub>4</sub> emissions, providing a  
1128 comprehensive view of their contribution to regional methane budgets.

1129 Despite some limitations in its current model configuration, this first version of FLaMe is a  
1130 significant step forward in biogeochemical simulations of lake CH<sub>4</sub> dynamics. The model explicitly  
1131 incorporates the dynamics of depth-integrated organic carbon cycling, such that the responses of  
1132 organic carbon to climate and environmental change can be accounted for in estimating CH<sub>4</sub>  
1133 emissions. We also have incorporated the primary production as a function of total dissolved  
1134 phosphorus loads from the surrounding catchments, allowing us to evaluate for the first time the  
1135 impact of eutrophication on CH<sub>4</sub> emissions in a quantitative way. Moreover, our model is of  
1136 intermediate complexity, and is thus designed for large scale applications. Although the model was  
1137 run here at a coarse spatial resolution, its parallelized version offers the possibility to carry  
1138 simulations at a finer resolution in the future. With these advancements, our model can be used to  
1139 resolve the spatio-temporal variability of CH<sub>4</sub> emissions at regional and global scales under past and  
1140 future climates, and has the potential to be coupled to Earth System Models to investigate the  
1141 feedback between climate warming and global lake CH<sub>4</sub> emissions.

1142 **Data availability**

1143 The methane emission data for the four well-surveyed real lakes (Klöntal, Erssjön, Upper Mystic, and  
1144 Villasjön) were obtained from Tan *et al.* (2024). The *in-situ* measurements of diffusive and ebullitive  
1145 CH<sub>4</sub> emission rates in boreal and central European regions during late summer (August–September  
1146 2010–2011) were obtained from Rinta *et al.* (2017). The lake characteristic information within Europe  
1147 were obtained from the HydroLAKES database (Messenger *et al.* 2016):  
1148 <https://www.hydrosheds.org/products/hydrolakes>. The meteorological variables from GSWP3-  
1149 W5E5 reanalysis product were obtained from Inter-Sectoral Impact Model Intercomparison Project  
1150 (ISIMIP3a): <https://www.isimip.org/gettingstarted/input-data-bias-adjustment/>.

1151

1152 **Code availability**

1153 The source codes for FLAME (Fluxes of Lake Methane) model version 1.0 are available at:  
1154 <https://github.com/myFeng818/FLaMe-model-v1.0.git>. The preprocessing and postprocessing codes  
1155 for the model can be obtained upon request.

1156

1157 **Acknowledgements**

1158 This study was supported by the Fonds National de la Recherche Scientifique of Belgium (F.R.S.–  
1159 FRNS PDR T.0191.23), by the project of CLIMATE-SPACE RECCAP2: Global Land Carbon  
1160 Budget and its Attribution to regional drivers, as well as by the project of ESM2025–Earth System  
1161 Models for the Future (101003536). We acknowledge the climate modelling groups involved in  
1162 ISIMIP3a for producing and making available their model outputs. Computational resources have

1163 been provided by the Consortium des Équipements de Calcul Intensif (CÉCI), funded by the Fonds  
1164 de la Recherche Scientifique de Belgique (F.R.S.-FNRS) under Grant No. 2.5020.11 and by the  
1165 Walloon Region.

1166

#### 1167 **Author contributions**

1168 M.M., M.F. and P.R. designed the study, as well as the overall model strategy. M.M. and M.F. co-  
1169 developed and tested the FLame model. D.B., S.A., R.L., A.J., G.G.L., M.D.M., and Z.T. provided  
1170 plenty of valuable suggestions related to the model development. D.B. and S.A. also provided  
1171 constructive suggestions on model evaluation against measurements and manuscript writing. M.D.M.  
1172 helped us in setting up the CSLM at the beginning of developing FLame, Z.T. provided us the  
1173 methane emission data from ISIMIP lake datasets, and W.T. helped us in collecting climate forcings  
1174 from ISIMIP3a. M.M. and M.F. wrote the first version of the manuscript, and all coauthors helped in  
1175 improving the manuscript.

1176

#### 1177 **Competing interests**

1178 The authors declare no competing interests.

1179

#### 1180 **Additional information**

1181 **Correspondence and requests for materials** should be addressed to M.F. (Maoyuan.feng@ulb.be)

1182



1183 **References**

- 1184 Aben, R.C.H., Barros, N., van Donk, E. *et al.*: Cross continental increase in methane ebullition under climate  
1185 change. *Nat. Commun.*, 8, 1682. <https://doi.org/10.1038/s41467-017-01535-y>, 2017.
- 1186 Aristegui, J., Agustí, S. and Duarte, C. M.: Respiration in the dark ocean, *Geophys. Res. Lett.*, 30, 1041,  
1187 <https://doi.org/10.1029/2002GL016227>, 2003.
- 1188 Bastviken D., Tranvik L. J., Downing, J. A., Crill, P. M., Enrich-Prast, A.: Freshwater methane emissions offset the  
1189 continental carbon sink, *Science*, 331(6013), 50. <https://doi.org/10.1126/science.1196808>, 2011.
- 1190 Bastviken, D. (2022). Methane. In T. Mehner & K. Tockner (Eds.), *Encyclopedia of Inland Waters (Second Edition)*  
1191 (pp. 136-154). Oxford: Elsevier.
- 1192 Bastviken, D., Cole, J., Pace, M., and Tranvik, L.: Methane emissions from lakes: Dependence of lake  
1193 characteristics, two regional assessments, and a global estimate, *Global Biogeochem. Cycles*, 18, GB4009,  
1194 <https://doi.org/10.1029/2004GB002238>, 2004.
- 1195 Behrenfeld, M. J. and Falkowski P. G.: Photosynthetic rates derived from satellite-based chlorophyll  
1196 concentration, *Limnol. Oceanogr.*, 42, <https://doi.org/10.4319/lo.1997.42.1.0001>, 1997.
- 1197 [Bodmer, P., Bors, C., Liu, L. and Lorke, A.: Large sediment methane production potential in reservoirs compared](https://doi.org/10.1002/lno.70063)  
1198 [to lakes and rivers. \*Limnol. Oceanogr.\*, <https://doi.org/10.1002/lno.70063>, 2025.](https://doi.org/10.1002/lno.70063)
- 1199 Boehrer, B. and Schultze, M.: Stratification of lakes, *Rev. Geophys.*, 46, 2006RG000210,  
1200 <https://doi.org/10.1029/2006RG000210>, 2008.
- 1201 [Bouffard, D., Doda, T., Ramón, C. L., Ulloa, H. N.: Thermally driven cross-shore flows in stratified basins: a review](https://doi.org/10.1017/flo.2024.31)  
1202 [on the thermal siphon dynamics. \*Flow\*. 2025;5:E1. doi:10.1017/flo.2024.31](https://doi.org/10.1017/flo.2024.31)
- 1203 Bouwman, A. F., Beusen, A. H. W., Billen G.: Human alteration of the global nitrogen and phosphorus soil  
1204 balances for the period 1970–2050, *Global Biogeochem. Cycles*, 23, GB0A04,  
1205 <https://doi.org/10.1029/2009GB003576>, 2009.
- 1206 Canadell, J. G., Monteiro, P. M. S., Costa, M. H., *et al.*: Global carbon and other biogeochemical cycles and  
1207 feedbacks, Climate Change 2021: The Physical Science Basis: Working Group I Contribution to the Sixth  
1208 Assessment Report of the Intergovernmental Panel on Climate Change, Cambridge University  
1209 Press, Cambridge, United Kingdom and New York, NY, USA, 673-816, 2021.
- 1210 Carlson, C. A., Ducklow, H. W., Michaels, A. F.: Annual flux of dissolved organic carbon from the euphotic zone  
1211 in the northwestern Sargasso Sea, *Nature*, 397, 405–408, 1994
- 1212 Cole, J. J., and Caraco, N. F.: Atmospheric exchange of carbon dioxide in a low-wind oligotrophic lake measured  
1213 by the addition of SF<sub>6</sub>, *Limnol. and Oceanogr.*, 4, <https://doi.org/10.4319/lo.1998.43.4.0647>, 1998.
- 1214 Deemer, B. R., Harrison, J. A., Li, S., *et al.*: Greenhouse Gas Emissions from Reservoir Water Surfaces: A New  
1215 Global Synthesis. *Bioscience*, 66(11), 949-964. <https://doi.org/10.1093/biosci/biw117>, 2016.

Deemer, B. R., & Holgerson, M. A.: Drivers of methane flux differ between lakes and reservoirs, complicating global upscaling efforts. *J. Geophys. Res.-Biogeo.*, 126, e2019JG005600, <https://doi.org/10.1029/2019JG005600>, 2021.

DelSontro, T., Beaulieu, J.J., and Downing, J.A.: Greenhouse gas emissions from lakes and impoundments: Upscaling in the face of global change, *Limnol. Oceanogr. Lett.*, 3, 64-75, <https://doi.org/10.1002/lol2.10073>, 2018

Delwiche, K. and Hemond, H.F.: An enhanced bubble size sensor for long-term ebullition studies. *Limnol. Oceanogr. Methods*, 15, 821-835. <https://doi.org/10.1002/lom3.10201>, 2017

Denfeld, B. A., Baulch, H. M., del Giorgio, P. A., Hampton, S. E., and Karlsson, J.: A synthesis of carbon dioxide and methane dynamics during the ice-covered period of northern lakes, *Limnol. Oceanogr. Lett.*, 3, 117-131. <https://doi.org/10.1002/lol2.10079>, 2018.

Dlugokencky, E. J., Steele, L. P., Lang, P. M., Masarie, K. A.: The growth rate and distribution of atmospheric methane, *J. Geophys. Res.*, 99, 17021–17043, <https://doi.org/10.1029/94JD01245>, 1994.

Doda, T., Ramón, C. L., Ulloa, H. N., Brennwald, M. S., Kipfer, R., Perga M.-E., Wüest, A., Schubert, C. J., Bouffard, D.: Lake surface cooling drives littoral-pelagic exchange of dissolved gases. *Sci. Adv.* **10**, eadi0617(2024). DOI:10.1126/sciadv.adi0617

Frieler, K., *et al.*: Scenario setup and forcing data for impact model evaluation and impact attribution within the third round of the Inter-Sectoral Impact Model Intercomparison Project (ISIMIP3a), *Geosci. Model Dev.*, 17, 1–51, <https://doi.org/10.5194/gmd-17-1-2024>, 2024.

Forster, P. M., *et al.*: Indicators of Global Climate Change 2023: annual update of key indicators of the state of the climate system and human influence, *Earth Syst. Sci. Data*, 16, 2625–2658, <https://doi.org/10.5194/essd-16-2625-2024>, 2024.

Garnaud, C., MacKay, M., & Fortin, V.: A one-dimensional lake model in ECCO's land surface prediction system. *J. Adv. Model. Earth Syst.*, 14, e2021MS002861. <https://doi.org/10.1029/2021MS002861>, 2022.

Gatley, D. P., Herrmann, S., & Kretzschmar, H. J.: A twenty-first century molar mass for dry air, *HVAC&R Research*, 14(5), 655–662. <https://doi.org/10.1080/10789669.2008.10391032>, 2008.

Golub, M., *et al.*: A framework for ensemble modelling of climate change impacts on lakes worldwide: the ISIMIP Lake Sector, *Geosci. Model Dev.*, 15, 4597–4623, <https://doi.org/10.5194/gmd-15-4597-2022>, 2022.

Grasset, C., Mendonça, R., Villamor Saucedo, G., Bastviken, D., Roland, F. and Sobek, S.: Large but variable methane production in anoxic freshwater sediment upon addition of allochthonous and autochthonous organic matter. *Limnol. Oceanogr.*, 63: 1488-1501. <https://doi.org/10.1002/lno.10786>, 2018.

Grossart, H., Frindte, K., Dziallas, C., Eckert, W., Tang, K.W.: Microbial methane production in oxygenated water column of an oligotrophic lake, *Proc. Natl. Acad. Sci. U.S.A.* 108 (49) 19657-19661, <https://doi.org/10.1073/pnas.1110716108>, 2011.

Guillemette, F., von Wachenfeldt, E., Kothawala, D. N., Bastviken, D., Tranvik, L. J.: Preferential sequestration of terrestrial organic matter in boreal lake sediments, *J. Geophys. Res. Biogeosci.*, 122, 863–874, <https://doi.org/10.1002/2016JG003735>, 2017.

Hanson, P. C., Hamilton, D. P., Stanley, E. H., Preston, N., Langman, O. C., Kara, E. L.: Fate of Allochthonous Dissolved Organic Carbon in Lakes: A Quantitative Approach. *PLoS One*, 6(7): e21884, <https://doi.org/10.1371/journal.pone.0021884>, 2011.

Hanson, P. C., Buffam, I., Rusak, J. A., Stanley, E. H., Watras, C.: Quantifying lake allochthonous organic carbon budgets using a simple equilibrium model, *Limnol. Oceanogr.*, 59, <https://doi.org/10.4319/lo.2014.59.1.0167>, 2014

Harrison, J. A., Prairie, Y. T., Mercier-Blais, S., Soued, C.: Year-2020 global distribution and pathways of reservoir methane and carbon dioxide emissions according to the greenhouse gas from reservoirs (G-res) model, *Global Biogeochem. Cycles*, 35, e2020GB006888. <https://doi.org/10.1029/2020GB006888>, 2021.

Holgerson, M., and Raymond, P.: Large contribution to inland water CO<sub>2</sub> and CH<sub>4</sub> emissions from very small ponds. *Nature Geosci.*, 9, 222–226. <https://doi.org/10.1038/ngeo2654>, 2016.

Imberger, J.: The diurnal mixed layer, *Limnol. Oceanogr.*, 30, 737–770, <https://doi.org/10.4319/lo.1985.30.4.0737>, 1985.

Imboden, D.M., and Wüest, A.: Mixing Mechanisms in Lakes. In: Lerman, A., Imboden, D.M., Gat, J.R. (eds) *Physics and Chemistry of Lakes*. Springer, Berlin, Heidelberg. [https://doi.org/10.1007/978-3-642-85132-2\\_4](https://doi.org/10.1007/978-3-642-85132-2_4), 1995.

Lan, X., Thoning, K.W., and Dlugokencky, E.J.: Trends in globally-averaged CH<sub>4</sub>, N<sub>2</sub>O, and SF<sub>6</sub> determined from NOAA Global Monitoring Laboratory measurements. <https://doi.org/10.15138/P8XG-AA10>, 2024

Langenegger, T., Vachon, D., Donis, D., McGinnis, D.F.: What the bubble knows: Lake methane dynamics revealed by sediment gas bubble composition. *Limnol. Oceanogr.*, 64: 1526-1544. <https://doi.org/10.1002/lno.11133>, 2019.

Lauerwald, R., Regnier, P., Figueiredo, V., Enrich-Prast, A., Bastviken, D., Lehner, B.: Natural lakes are a minor global source of N<sub>2</sub>O to the atmosphere. *Global Biogeochem. Cycles*, 33, 1564–1581. <https://doi.org/10.1029/2019GB006261>, 2019.

Lauerwald, R., Allen, G. H., Deemer, B. R., Liu, S., Maavara, T., Raymond, P., *et al.*: Inland water greenhouse gas budgets for RECCAP2: 2. Regionalization and homogenization of estimates. *Global Biogeochemical Cycles*, 37, e2022GB007658, <https://doi.org/10.1029/2022GB007658>, 2023.

1280 Lewis, W. M.: Global primary production of lakes: 19<sup>th</sup> Baldi Memorial Lecture, *Inland Waters*, 1(1), 1–28.  
1281 [https://doi.org/10.5268/IW-1.1.384\\_2011](https://doi.org/10.5268/IW-1.1.384_2011).

1282 Liikanen, A., Murtoniemi, T., Tanskanen, H., Väisänen, T., *Martikainen, P. J.*: Effects of temperature and oxygen  
1283 availability on greenhouse gas and nutrient dynamics in sediment of a eutrophic mid-boreal  
1284 lake, *Biogeochemistry*, 59, 269–286. [https://doi.org/10.1023/A:1016015526712\\_2002](https://doi.org/10.1023/A:1016015526712_2002)

1285 Maavara, T., Lauerwald, R., Regnier, P., Van Cappellen, P.: Global perturbation of organic carbon cycling by river  
1286 damming, *Nat. Commun.* **8**, 15347. [https://doi.org/10.1038/ncomms15347\\_2017](https://doi.org/10.1038/ncomms15347_2017).

1287 Maavara, T., Lauerwald, R., Laruelle, G. G., Akbarzadeh, Z., Bouskill, N. J., Van Cappellen, P., Regnier,  
1288 P. Nitrous oxide emissions from inland waters: Are IPCC estimates too high? *Glob Change Biol.*, 25, 473–  
1289 448. [https://doi.org/10.1111/gcb.14504\\_2019](https://doi.org/10.1111/gcb.14504_2019).

1290 MacIntyre, S., Bastviken, D., Arneborg, L., Crowe, A. T., Karlsson, J., Andersson, A., Gålfalk, M., Rutgersson, A.,  
1291 Podgrajsek, E., Melack, J. M.: Turbulence in a small boreal lake: Consequences for air-water gas exchange,  
1292 *Limnol. Oceanogr.*, 66(3):827–854. [https://doi.org/10.1002/lno.11645\\_2020](https://doi.org/10.1002/lno.11645_2020).

1293 MacKay, M. D., Versegny, D. L., Fortin, V., and Rennie, M. D.: Wintertime simulations of a boreal lake with the  
1294 Canadian Small Lake Model, *J. Hydrometeorol.*, 18, 2143–2160, [https://doi.org/10.1175/JHM-D-16-0268.1\\_2017](https://doi.org/10.1175/JHM-D-16-0268.1_2017).

1296 MacKay, M. D.: A process-oriented small lake scheme for coupled climate modeling applications, *J.*  
1297 *Hydrometeorol.*, 13, 1911–1924, [https://doi.org/10.1175/JHM-D-11-0116.1\\_2012](https://doi.org/10.1175/JHM-D-11-0116.1_2012).

1298 McGinnis, D. F., Greinert, J., Artemov, Y., Beaubien, S. E., Wüest, A.: Fate of rising methane bubbles in stratified  
1299 waters: How much methane reaches the atmosphere? *J. Geophys. Res.*, 111, C09007,  
1300 [https://doi.org/10.1029/2005JC003183\\_2006](https://doi.org/10.1029/2005JC003183_2006)

1301 Mendonça, R., Müller, R.A., Clow, D., Verpoorter, C., Raymond, P., Tranvik, L. J., Sobek, S.: Organic carbon  
1302 burial in global lakes and reservoirs, *Nat. Commun.*, 8, 1694, [https://doi.org/10.1038/s41467-017-01789-6\\_2017](https://doi.org/10.1038/s41467-017-01789-6_2017)

1304 Messenger, M., Lehner, B., Grill, G., Nedeva, I., Schmitt, O.: Estimating the volume and age of water stored in global  
1305 lakes using a geo-statistical approach. *Nat. Commun.*, 7, 13603, [https://doi.org/10.1038/ncomms13603\\_2016](https://doi.org/10.1038/ncomms13603_2016).

1306 Martin, J. H., Knauer, G. A., Karl, D. M., Broenkow, W. W.: VERTEX: carbon cycling in the northeast Pacific,  
1307 *Deep. Sea. Res. A.*, 34, 2, 267–285, [https://doi.org/10.1016/0198-0149\(87\)90086-0\\_1987](https://doi.org/10.1016/0198-0149(87)90086-0_1987).

1308 Mayorga, E., Seitzinger, S. P., Harrison, J. A., Dumont, E. Beusen, A. H. W., Bouwman, A. F., Fekete, B. M.,  
1309 Kroeze, C., Van Drecht, G.: Global Nutrient Export from WaterSheds 2 (NEWS 2): Model development and  
1310 implementation, *Environ. Model. Softw.*, 25, 7, 837–853, [https://doi.org/10.1016/j.envsoft.2010.01.007\\_2010](https://doi.org/10.1016/j.envsoft.2010.01.007_2010).

1311 Mayr, M. J., Zimmermann, M., Dey, J., *et al.*: Growth and rapid succession of methanotrophs effectively limit  
1312 methane release during lake overturn. *Commun. Biol.*, 3, 108. [https://doi.org/10.1038/s42003-020-0838-z\\_2020](https://doi.org/10.1038/s42003-020-0838-z_2020).

2020.

Mostovaya, A., Wind-Hansen, M., Rousteau, P., Bristow, L.A. and Thamdrup, B.: Sulfate- and iron-dependent anaerobic methane oxidation occurring side-by-side in freshwater lake sediment. *Limnol Oceanogr*, 67, 231–246. <https://doi.org/10.1002/lno.11988>, 2022

Jackson, R., Saunio, M., Bousquet, P., Canadell, J. G., Poulter, B., Stavert, A. R., Bergamaschi, P., Niwa, Y., Segers, A., Tsuruta, A.: Increasing anthropogenic methane emissions arise equally from agricultural and fossil fuel sources, *Environ. Res. Lett.*, 15, 071002, <https://doi.org/10.1088/1748-9326/ab9ed2>, 2020.

Johnson, M. S., Matthews, E., Du, J., Genovese, V., Bastviken, D.: Methane emission from global lakes: New spatiotemporal data and observation-driven modeling of methane dynamics indicates lower emissions, *J. Geophys. Res.-Biogeo.*, 127, e2022JG006793. <https://doi.org/10.1029/2022JG006793>, 2022.

Pajala, G., Sawakuchi, H. O., Rudberg, D., *et al.*: The effects of water column dissolved oxygen concentrations on lake methane emissions—Results from a whole-lake oxygenation experiment. *J. Geophys. Res.: Biogeo.*, 128(11), e2022JG007185. doi:10.1029/2022jg007185, 2023.

Petrescu, A. M. R., Qiu, C., Ciais, P., *et al.*: The consolidated European synthesis of CH<sub>4</sub> and N<sub>2</sub>O emissions for the European Union and United Kingdom: 1990–2017, *Earth Syst. Sci. Data*, 13, 2307–2362, <https://doi.org/10.5194/essd-13-2307-2021>, 2021.

Petrescu, A. M. R., Qiu, C., McGrath, M. J., *et al.*: The consolidated European synthesis of CH<sub>4</sub> and N<sub>2</sub>O emissions for the European Union and United Kingdom, 1990–2019, *Earth Syst. Sci. Data*, 15, 1197–1268, <https://doi.org/10.5194/essd-15-1197-2023>, 2023.

Rinta, P., Bastviken, D. Schilder, J., van Hardenbroek, M., Stötter, T., Heiri, O.: Higher Late Summer Methane Emission from Central Than Northern European Lakes, *J. Limnol.*, 76 (1), <https://doi.org/10.4081/jlimnol.2016.1475>, 2016, 2017.

Regnier, P., Dale, A.W., Arndt, S., LaRowe, D.E., Mogollón, J., Van Cappellen, P.: Quantitative analysis of anaerobic oxidation of methane (AOM) in marine sediments: A modeling perspective, *Earth-Sci. Rev.*, 106, 1–2, 105–130, <https://doi.org/10.1016/j.earscirev.2011.01.002>, 2011.

Reynolds, C. S.: The ecology of phytoplankton, Cambridge University Press, 2006

Rosentreter, J. A., Borges, A. V., Deemer, B. R., *et al.*: Half of global methane emissions come from highly variable aquatic ecosystem sources, *Nat. Geosci.*, 14(4), 225–230, <https://doi.org/10.1038/s41561-021-00715-2>, 2021.

Ruardij, P. & Van Raaphorst, W.: Benthic nutrient regeneration in the ERSEM ecosystem model of the North Sea, *Neth. J. Sea Res.*, 33, 3–4, 453–483, [https://doi.org/10.1016/0077-7579\(95\)90057-8](https://doi.org/10.1016/0077-7579(95)90057-8), 1995.

Saunio, M., Bousquet, P., Poulter, B., *et al.*: The global methane budget 2000–2012, *Earth Syst. Sci. Data*, 8, 697–751, <https://doi.org/10.5194/essd-8-697-2016>, 2016.

1346 Saunio, M., Stavert, A. R., Poulter, B., *et al.*: The Global Methane Budget 2000–2017, *Earth Syst. Sci. Data*, 12,  
1347 1561–1623, <https://doi.org/10.5194/essd-12-1561-2020>, 2020.

1348 Saunio, M., Martinez, A., Poulter, B., *et al.*, Global Methane Budget 2000–2020, *Earth Syst. Sci. Data Discuss.*,  
1349 <https://doi.org/10.5194/essd-2024-115>, in review, 2024.

1350 Stavert, A. R., Saunio, M., Canadell, J. G., *et al.*: Regional trends and drivers of the global methane  
1351 budget, *Glob. Change Biol.*, 28, 182–200. <https://doi.org/10.1111/gcb.15901>, 2021.

1352 Stepanenko, V., Mammarella, I., Ojala, A., Miettinen, H., Lykosov, V., and Vesala, T.: LAKE 2.0: a model for  
1353 temperature, methane, carbon dioxide and oxygen dynamics in lakes, *Geosci. Model Dev.*, 9, 1977–2006,  
1354 <https://doi.org/10.5194/gmd-9-1977-2016>, 2016.

1355 [Su, G., Zopfi, J., Yao, H., Steinle, L., Niemann, H. and Lehmann, M.F.: Manganese/iron-supported sulfate-](#)  
1356 [dependent anaerobic oxidation of methane by archaea in lake sediments. \*Limnol. Oceanogr.\*, 65, 863-875.](#)  
1357 <https://doi.org/10.1002/lno.11354>, 2020.

1358 Tan, Z., Zhuang, Q., and Anthony, K. W.: Modeling methane emissions from arctic lakes: Model development and  
1359 site-level study, *J. Adv. Model. Earth Syst.*, 7, 459–483, <https://doi.org/10.1002/2014MS000344>, 2015.

1360 Tan, Z., Yao, H., Melack, J., Grossart, H.-P., Jansen, J., Balathandayuthabani, S., *et al.*  A lake biogeochemistry  
1361 model for global methane emissions: Model development, site-level validation, and global applicability. *J. Adv.*  
1362 *Model. Earth Syst.*, 16, e2024MS004275. <https://doi.org/10.1029/2024MS004275>, 2024.

1363 Thottathil, S. D., Reis, P. C. J., Prairie, Y. T.: Methane oxidation kinetics in northern freshwater  
1364 lakes. *Biogeochemistry*, 143(1), 105–116. <https://www.jstor.org/stable/48701400>, 2019.

1365 Thullner, M., Regnier, P.: Microbial controls on the biogeochemical dynamics in the subsurface. *Rev. Mineral.*  
1366 *Geochem.*, 85 (1): 265–302. <https://doi.org/10.2138/rmg.2019.85.9>, 2019.

1367 Van Drecht, G., Bouwman, A. F., Harrison, J., Knoop, J. M.: Global nitrogen and phosphate in urban wastewater  
1368 for the period 1970 to 2050, *Global Biogeochem. Cycles*, 23, GB0A03,  
1369 <https://doi.org/10.1029/2009GB003458>, 2009.

1370 Varadharajan, C.: Magnitude and spatio-temporal variability of methane emissions from a eutrophic freshwater lake,  
1371 Thesis (Ph. D.)--Massachusetts Institute of Technology, Dept. of Civil and Environmental Engineering, 2009.

1372 Verseghy, D. L., and MacKay, M. D.: Offline Implementation and Evaluation of the Canadian Small Lake Model  
1373 with the Canadian Land Surface Scheme over Western Canada. *J. Hydrometeor.*, 18, 1563–  
1374 1582, <https://doi.org/10.1175/JHM-D-16-0272.1>, 2017.

1375 [Wanninkhof, R., Relationship between wind speed and gas exchange over the ocean revisited, \*Limnol. Oceanogr.\*](#)  
1376 [Methods](#), 12, doi:10.4319/lom.2014.12.351, 2014.

1377 [Wanninkhof, R., Asher, W. E., Ho, D. T., Sweeney, C., McGillis, W. R.: Advances in quantifying air-sea gas](#)  
1378 [exchange and environmental forcing, \*Ann. Rev. Mar. Sci.\*, 1, 213-44, https://doi.org/](#)

1379 10.1146/annurev.marine.010908.163742, 2009.

1380 Wetzel, R.G.: Limnology: Lake and River Ecosystems. Third Edition, Academic Press, San Diego, p389, 2001.

1381 William, R., Georgiy, K., Matti, L.: Basin-scale circulation and heat fluxes in ice-covered lakes, *Limnol.*  
1382 *Oceanogr.*, 59, <https://doi.org/10.4319/lo.2014.59.2.0445>, 2014.

1383 Zhuang, Q., Guo, M., Melack, J.M., Lan, X., Tan, Z., Oh, Y., Leung, L. R.: Current and future global lake methane  
1384 emissions: A process-based modeling analysis. *J. Geophys. Res.- Biogeo.*, 128,  
1385 e2022JG007137, [https://doi.org/10.1029/2022JG007137\\_2023](https://doi.org/10.1029/2022JG007137_2023).

1386 Zimmermann, M., Mayr, M. J., Bouffard, D., Eugster, W., Steinsberger, T., Wehrli, B., Brand, A. Bürgmann,  
1387 H.: Lake overturn as a key driver for methane oxidation, preprint, <https://doi.org/10.1101/689182>, 2019.
